# Supplementary material for: Synthetic Design and Biological Evaluation of New p53-MDM2 Interaction Inhibitors Based on Imidazoline Core
Source: MDPI journal article supplement (doi:10.3390/ph15040444), 2022-04-02

# Supplementary Materials

**Daniil R. Bazanov <sup>1,†</sup>, Nikolay V. Pervushin <sup>2,†</sup>, Egor V. Savin <sup>2</sup>, Michael D. Tsymliakov <sup>1</sup>, Anita I. Maksutova <sup>1</sup>, Victoria Yu. Savitskaya <sup>1</sup>, Sergey E. Sosonyuk <sup>1</sup>, Yulia A. Gracheva <sup>1</sup>, Michael Yu. Seliverstov <sup>1</sup>, Natalia A. Lozinskaya<sup>† 1\*</sup> and Gelina S. Kopeina<sup>† 2\*</sup>.**

<sup>1</sup> Department of Chemistry, M. V. Lomonosov Moscow State University, 1, Leninskie Gory, 119992 Moscow, Russian Federation

<sup>2</sup> Department of Medicine, M. V. Lomonosov Moscow State University, 1, Leninskie Gory, 119991 Moscow, Russian Federation

[†] and [‡] these authors contributed equally to this work

✉ Gelina S. Kopeina    lirroster@gmail.com    Natalia A. Lozinskaya    natalylozinskaya@mail.ru

**Synthetic design and biological evaluation of new p53-MDM2 interaction inhibitors based on imidazoline core.**

*Pharmaceuticals* 2022, 15, 444. <https://doi.org/10.3390/ph15040444>

# Molecular docking

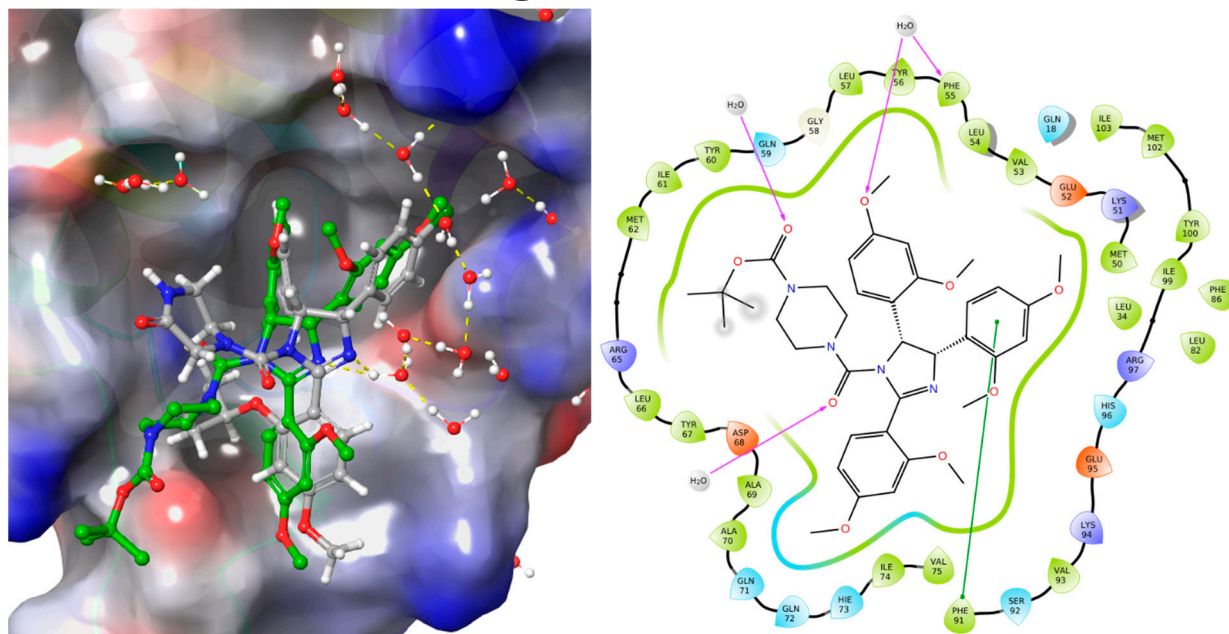

**Supplementary Figure S1** The docked pose (on the left) for **2m** (green) in p53 binding site of MDM2 protein in comparison to nutlin-3a (grey), as well as its ligand-protein interaction map (on the right)

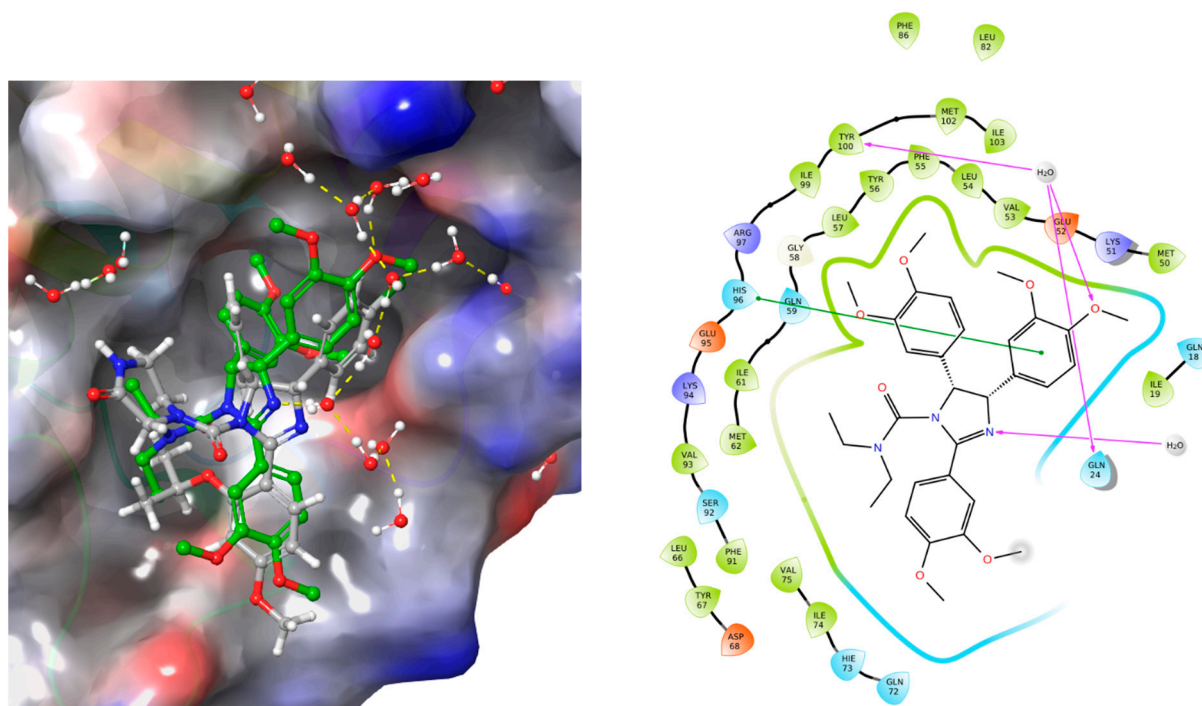

**Supplementary Figure S2** The docked pose (on the left) for **2n** (green) in p53 binding site of MDM2 protein in comparison to nutlin-3a (grey), as well as its ligand-protein interaction map (on the right).

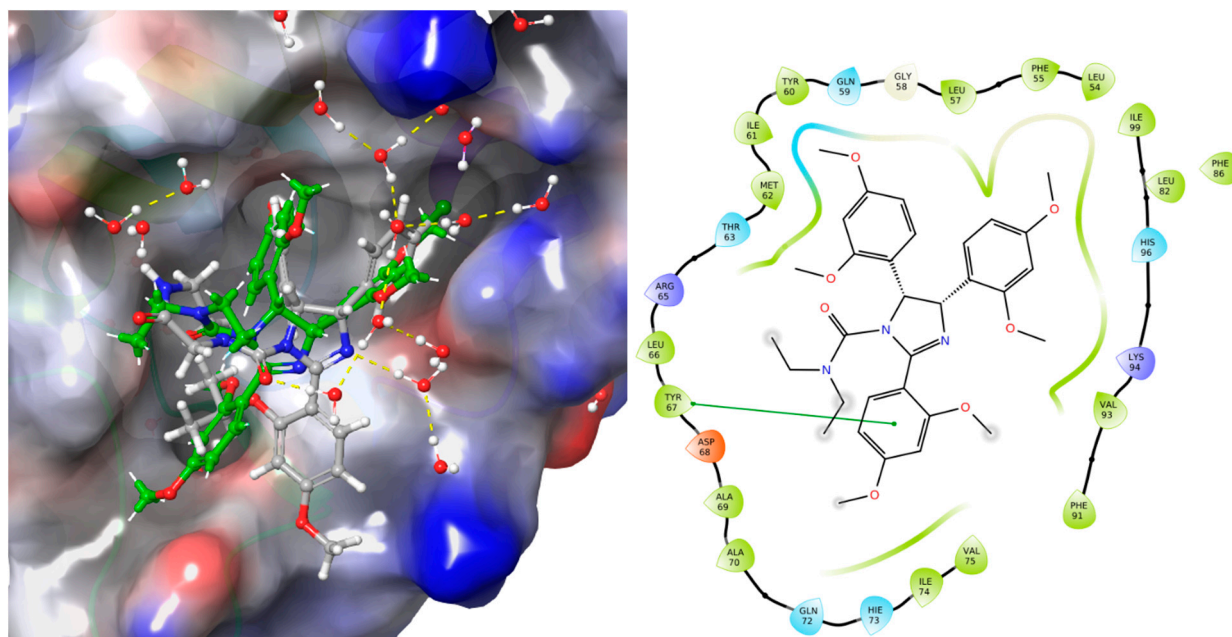

**Supplementary Figure S3** The docked pose (on the left) for **2i** (green) in p53 binding site of MDM2 protein in comparison to nutlin-3a (grey), as well as its ligand-protein interaction map (on the right).

## Biology

**Supplementary Table S1.** Cytotoxicity of synthesized 2,4,5-triaryl cis-imidazoline derivatives to HCT-116 cell line.

| 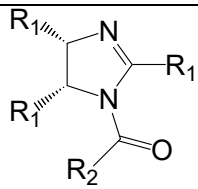 |                                                                                     |                                                                                     |                       |           |                                                                                      |                                                                                       |                       |
|-------------------------------------------------------------------------------------|-------------------------------------------------------------------------------------|-------------------------------------------------------------------------------------|-----------------------|-----------|--------------------------------------------------------------------------------------|---------------------------------------------------------------------------------------|-----------------------|
| ID                                                                                  | R1                                                                                  | R2                                                                                  | IC <sub>50</sub> , μM | ID        | R1                                                                                   | R2                                                                                    | IC <sub>50</sub> , μM |
| <b>2a</b>                                                                           |  |  | 54                    | <b>2o</b> |  |  | 131                   |
| <b>2b</b>                                                                           |  |  | >200                  | <b>2p</b> |  |  | 102                   |
| <b>2c</b>                                                                           |  |  | 54                    | <b>2q</b> |  |  | 112                   |
| <b>2d</b>                                                                           |  |  | 38                    | <b>2r</b> |  |  | >200                  |

|           |                                                                                     |                                                                                     |     |            |                                                                                      |                                                                                       |      |
|-----------|-------------------------------------------------------------------------------------|-------------------------------------------------------------------------------------|-----|------------|--------------------------------------------------------------------------------------|---------------------------------------------------------------------------------------|------|
| <b>2e</b> | 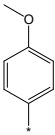   |    | 115 | <b>2s</b>  |    |    | 77   |
| <b>2f</b> |    |    | 27  | <b>2t</b>  |    |    | >200 |
| <b>2g</b> |    |    | 41  | <b>2u</b>  |    |    | 9    |
| <b>2h</b> |    |    | 59  | <b>2v</b>  |    |    | 98   |
| <b>2i</b> |   |    | 30  | <b>2w</b>  |    |    | 65   |
| <b>2j</b> |  |  | 126 | <b>2x</b>  |   |  | 11   |
| <b>2k</b> |  |  | 23  | <b>2y</b>  |  |  | 24   |
| <b>2l</b> |  |  | 16  | <b>2z</b>  |  |  | 17   |
| <b>2m</b> |  |  | 13  | <b>2aa</b> |  |  | 21   |
| <b>2n</b> |  |  | 51  |            |                                                                                      |                                                                                       |      |

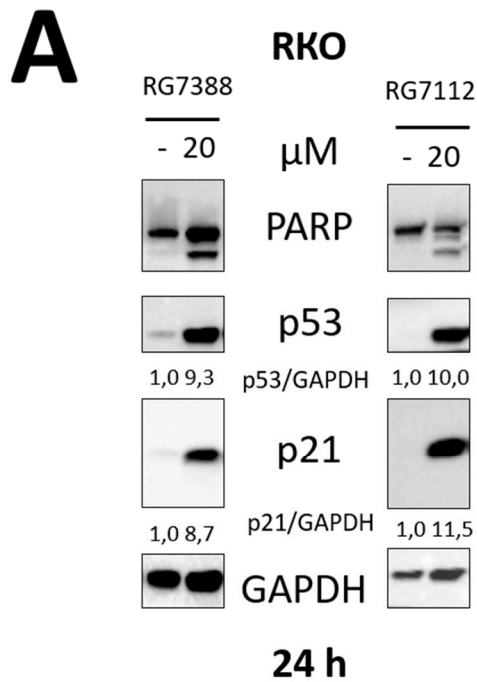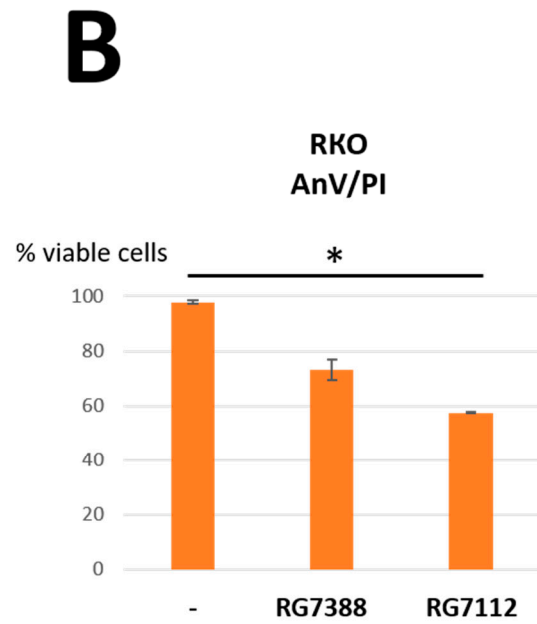

**Supplementary Figure S4** A. Western Blot analysis of total cellular lysates from RKO cells upon treatment with RG7388 and RG7112. B. The histograms of flow cytometry (FC) analysis data for RKO cells using Annexin V-FITC / PI staining, % viable cells – cells negative for both Annexin V-FITC and propidium iodide (PI). Data from  $n = 3$  biological replicates were shown as mean  $\pm$  s.d., \*  $p < 0.05$ , n.s. – not significant. PARP – poly (ADP-ribose)-polymerase; GAPDH – glyceraldehyde 3-phosphate dehydrogenase; p53/GAPDH and p21/GAPDH – densitometric analysis of p53 or p21 bands normalized to GAPDH, h – hours.

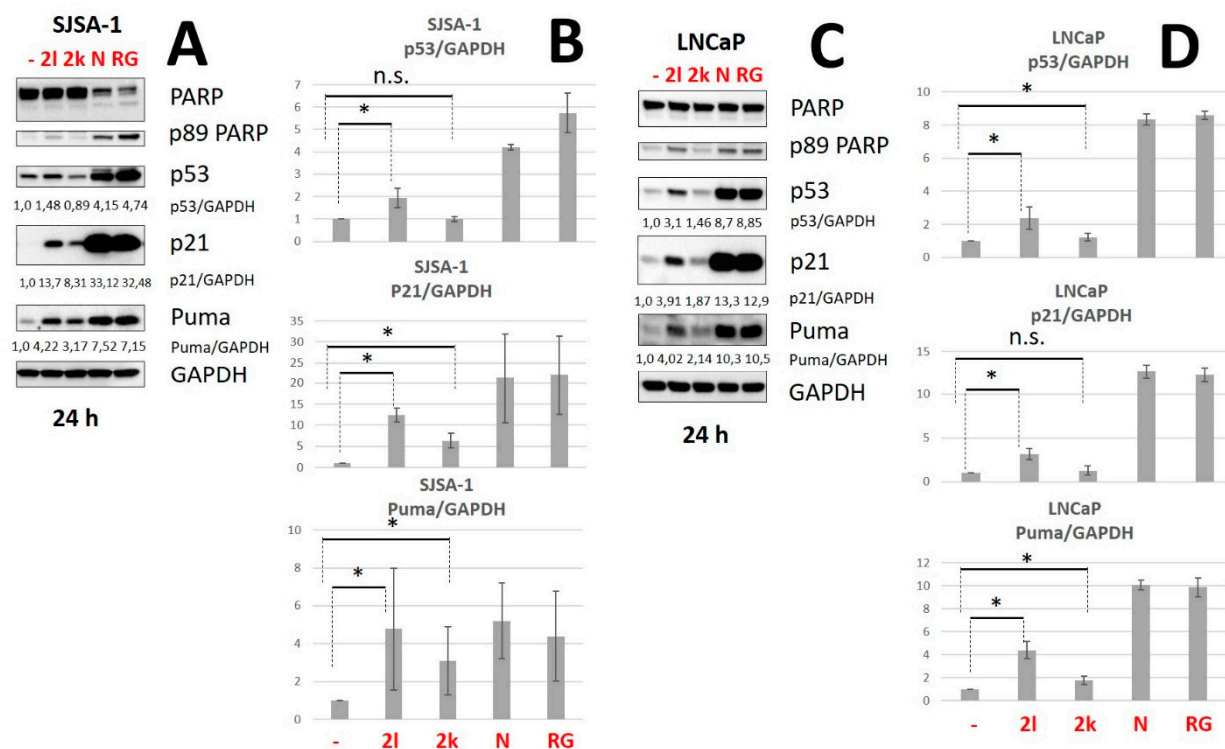

**Supplementary Figure S5 A, C.** Western Blot analysis of total cellular lysates from SJSA-1 (A) and LNCaP (C) cells upon treatment with compounds **2I**, **2k**, Nutlin-3a and RG7388. B, D - Densitometric analysis of p53, p21 and Puma bands normalized to GAPDH in SJSA-1 (B) and LNCaP (D) cells. Data from n = 3 biological replicates were shown as mean  $\pm$  s.d., \* p < 0.05, n.s. – not significant. PARP – poly (ADP-ribose)-polymerase; GAPDH – glyceraldehyde 3-phosphate dehydrogenase; p53/GAPDH, p21/GAPDH and Puma/GAPDH – densitometric analysis of p53, p21 and Puma bands normalized to GAPDH, h – hours, N - Nutlin-3a (10  $\mu$ M), R – RG7388 (5  $\mu$ M).

# Chemistry (1H and 13C NMR data for compounds 2a-2aa)

**1H NMR** *Cis-N,N*-diethyl-2,4,5-*tris*(4-methoxyphenyl)-4,5-dihydro-1H-imidazole-1-carboxamide (2a)

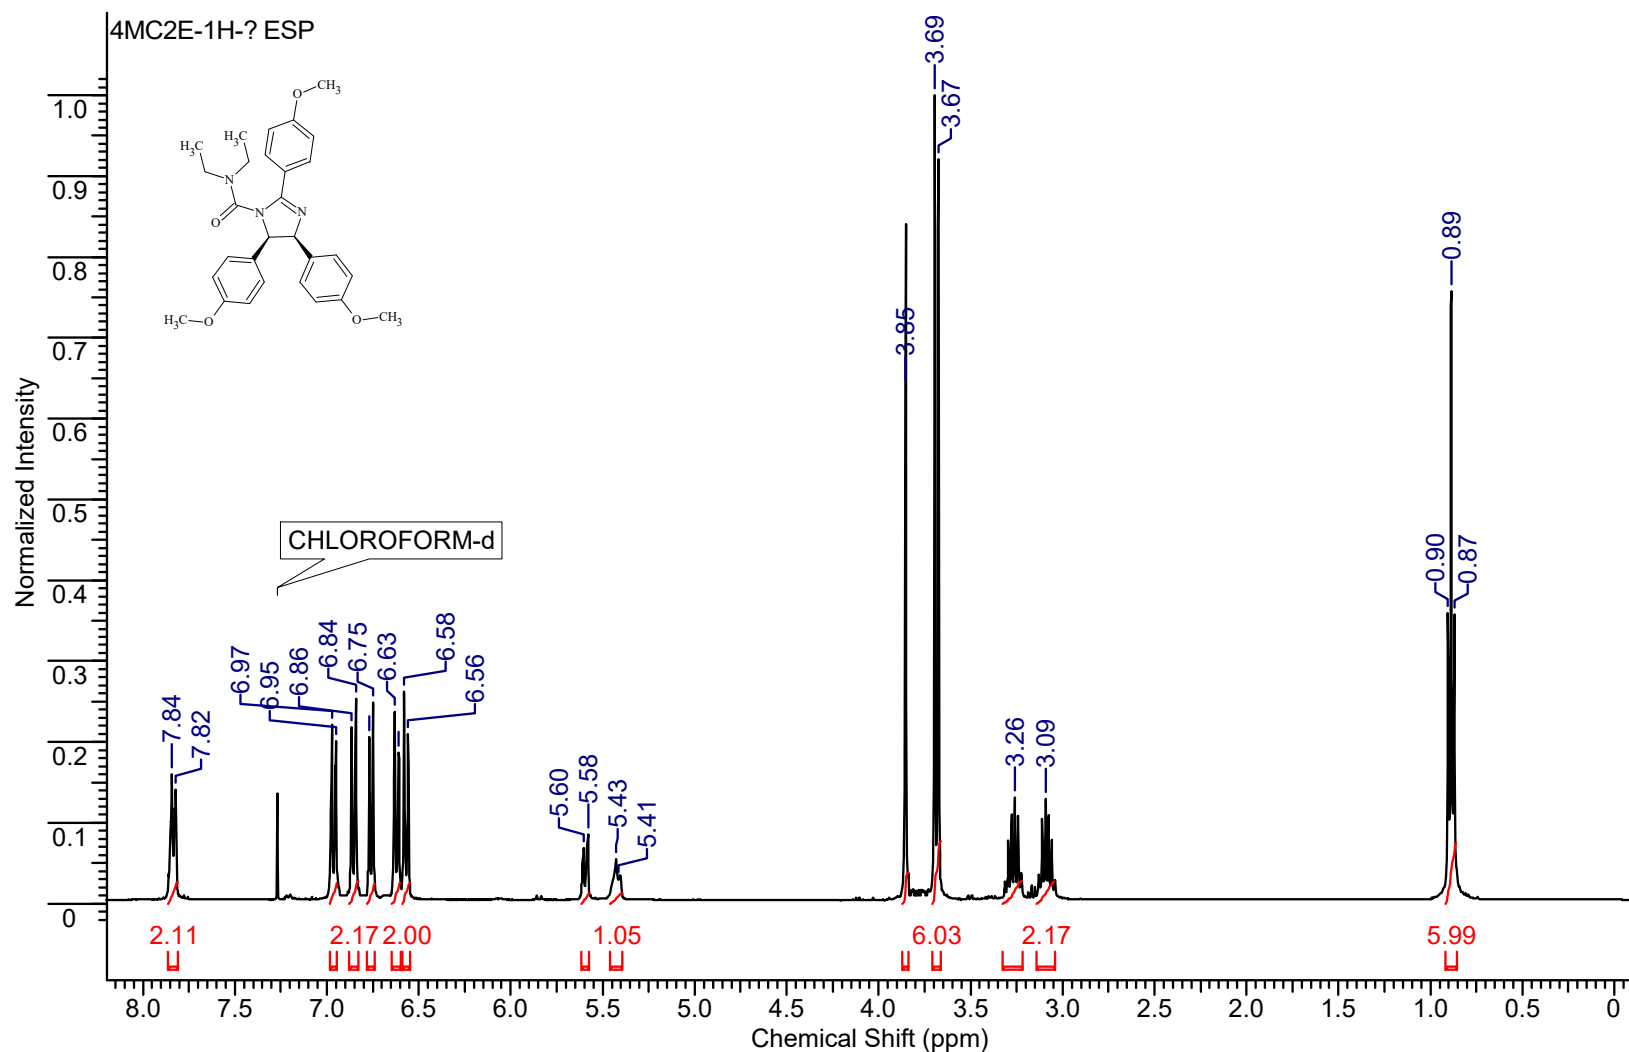

***<sup>13</sup>C NMR*** *Cis-N,N*-diethyl-2,4,5-*tris*(4-methoxyphenyl)-4,5-dihydro-1*H*-imidazole-1-carboxamide (2a)

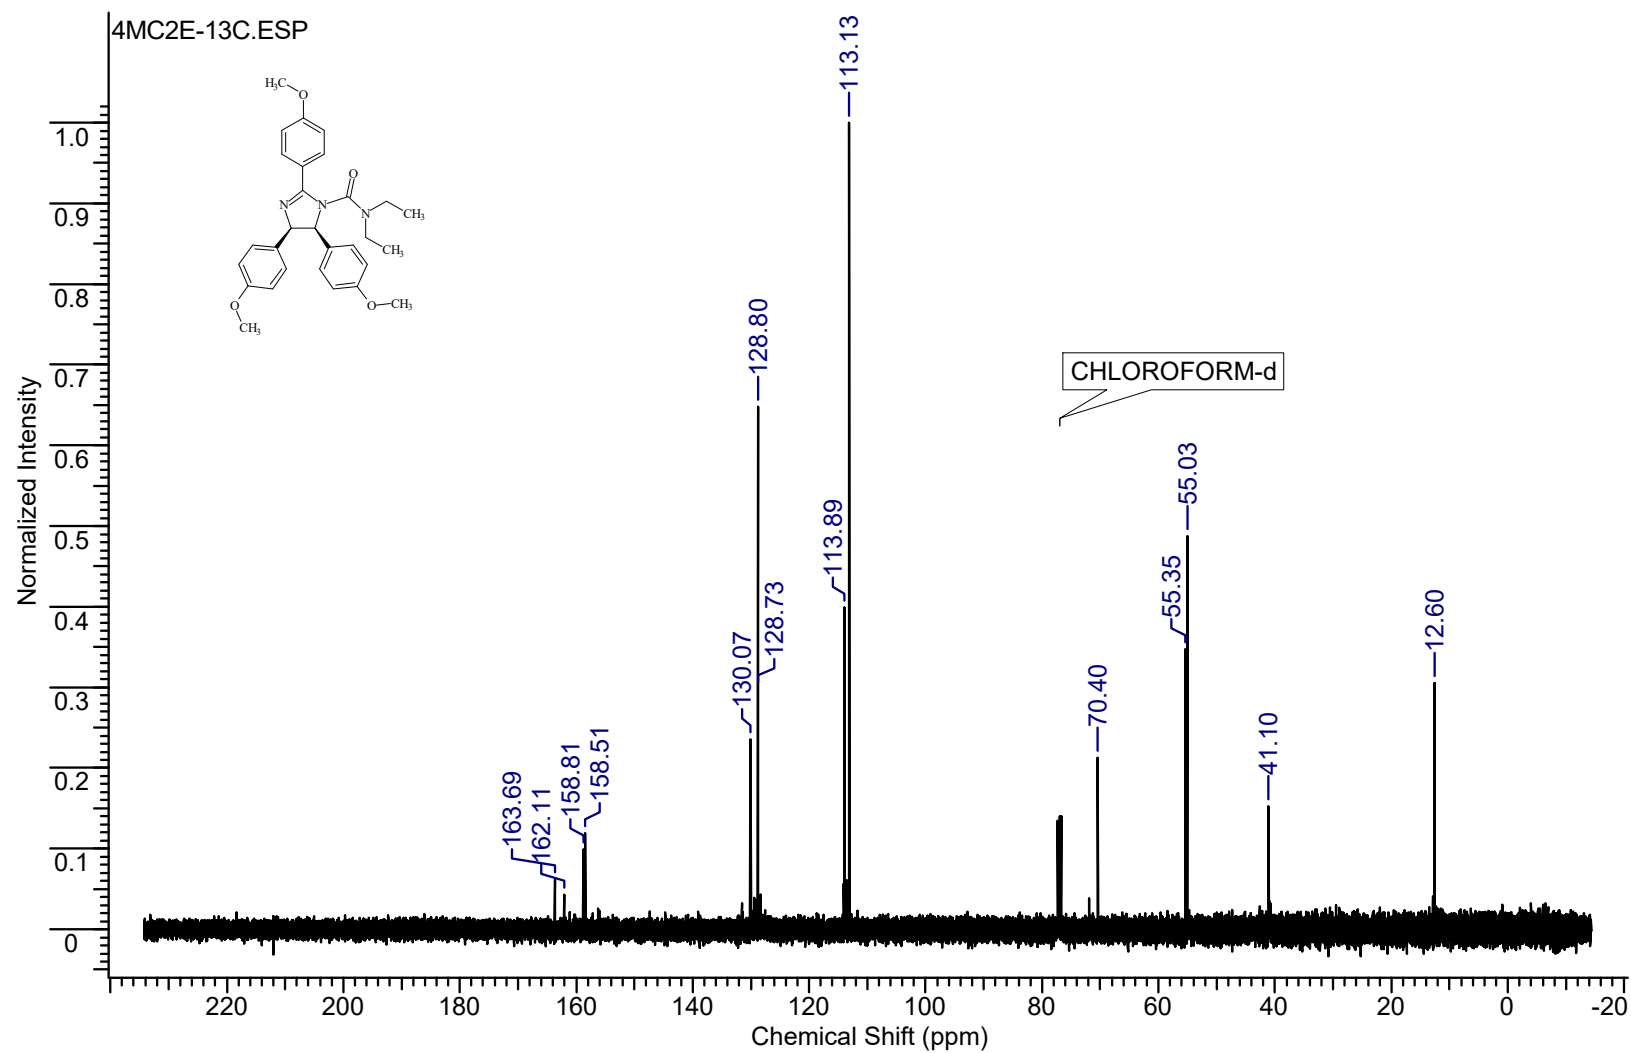

**<sup>1</sup>H NMR 4-[[*Cis*-2,4,5-*tris*(4-methoxyphenyl)-4,5-dihydro-1H-imidazol-1-yl]carbonyl]morpholine (2b).**

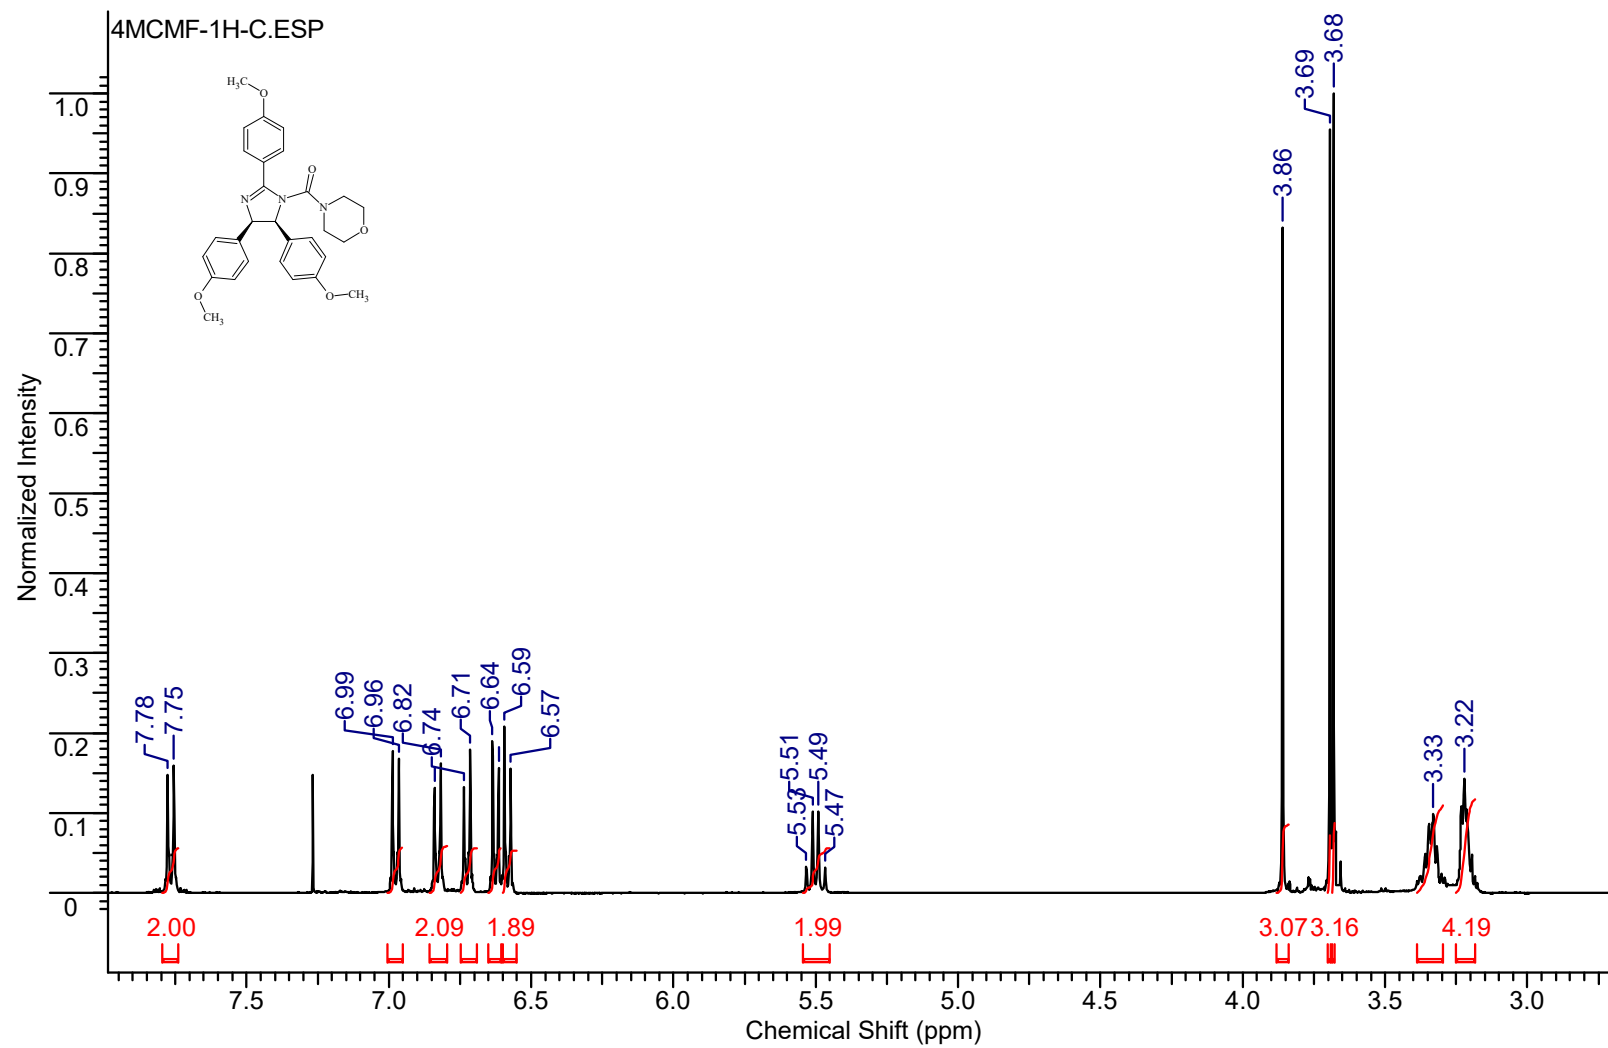

**<sup>13</sup>C NMR 4-[[*Cis*-2,4,5-*tris*(4-methoxyphenyl)-4,5-dihydro-1H-imidazol-1-yl]carbonyl]morpholine (2b).**

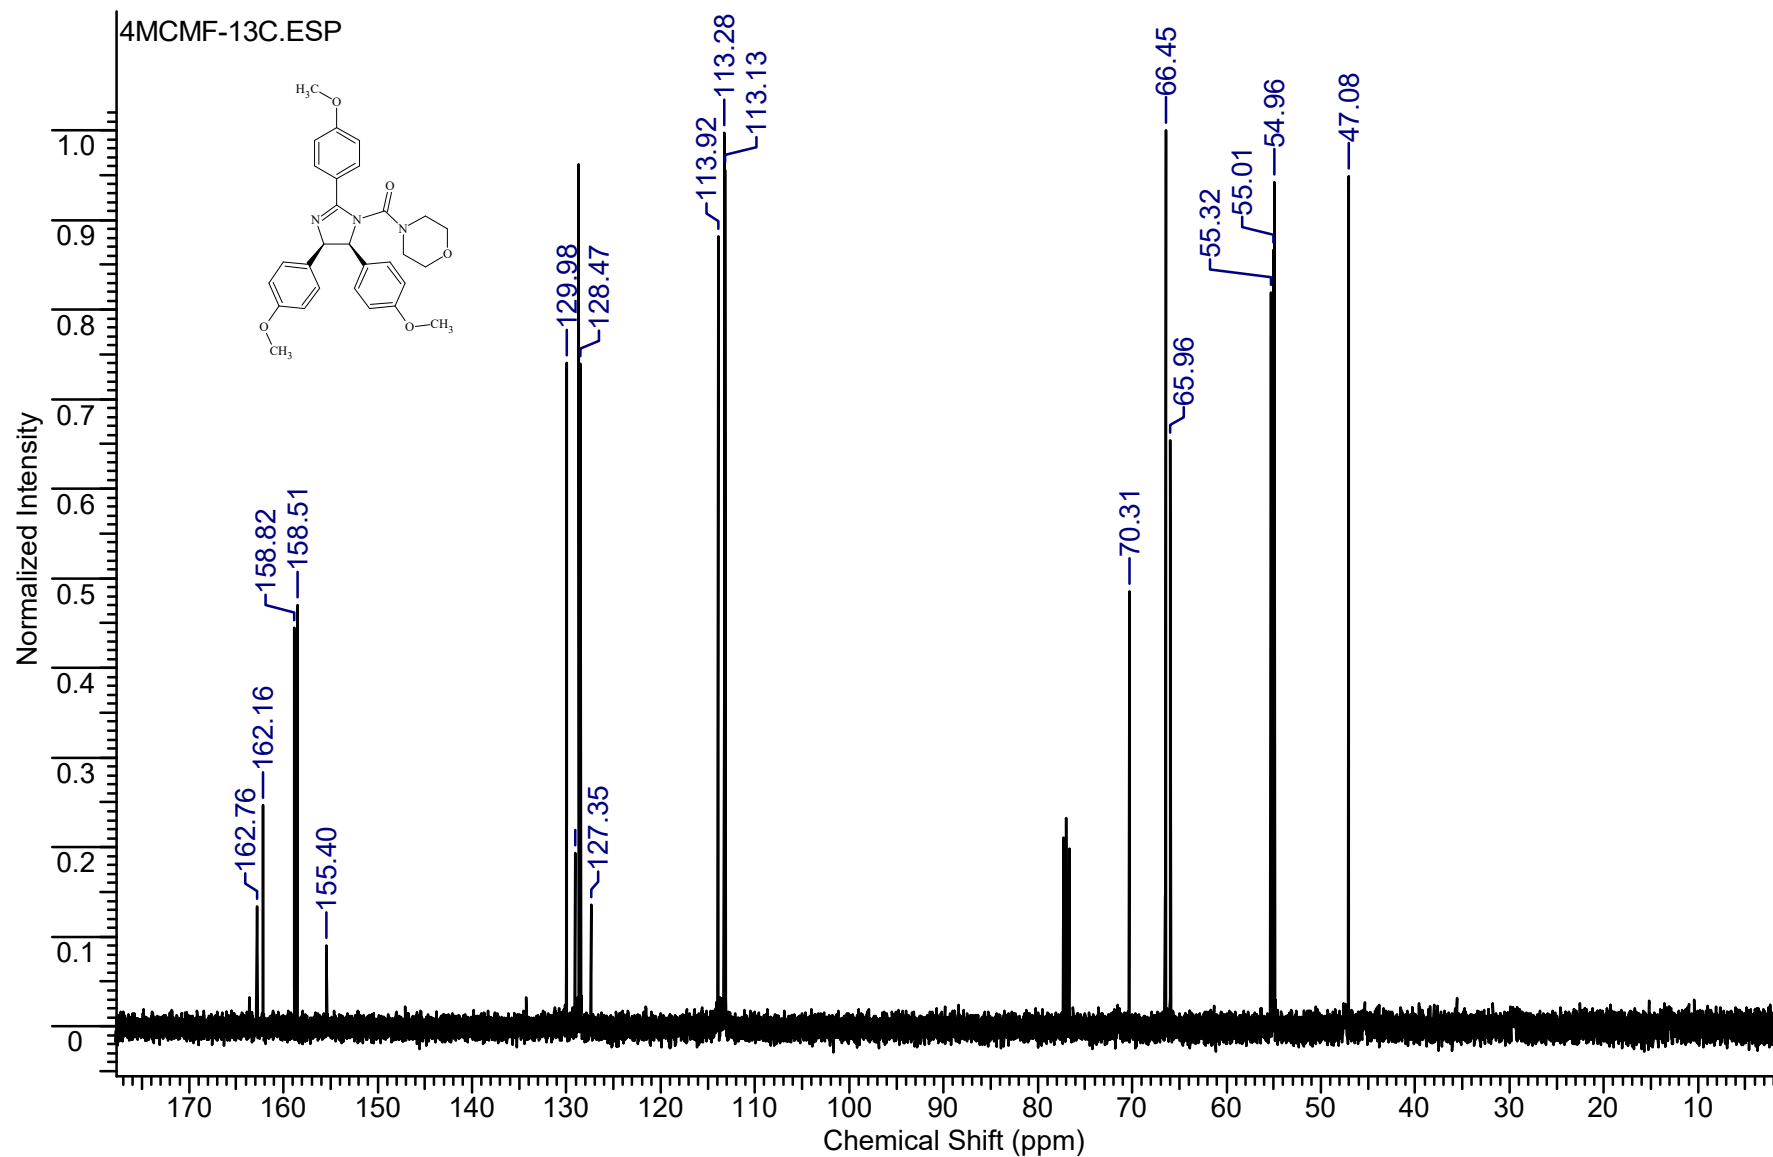

**<sup>1</sup>H NMR Piperidin-1-yl(*cis*-2,4,5-*tris*(4-methoxyphenyl)-4,5-dihydro-1*H*-imidazol-1-yl)methanone (2c).**

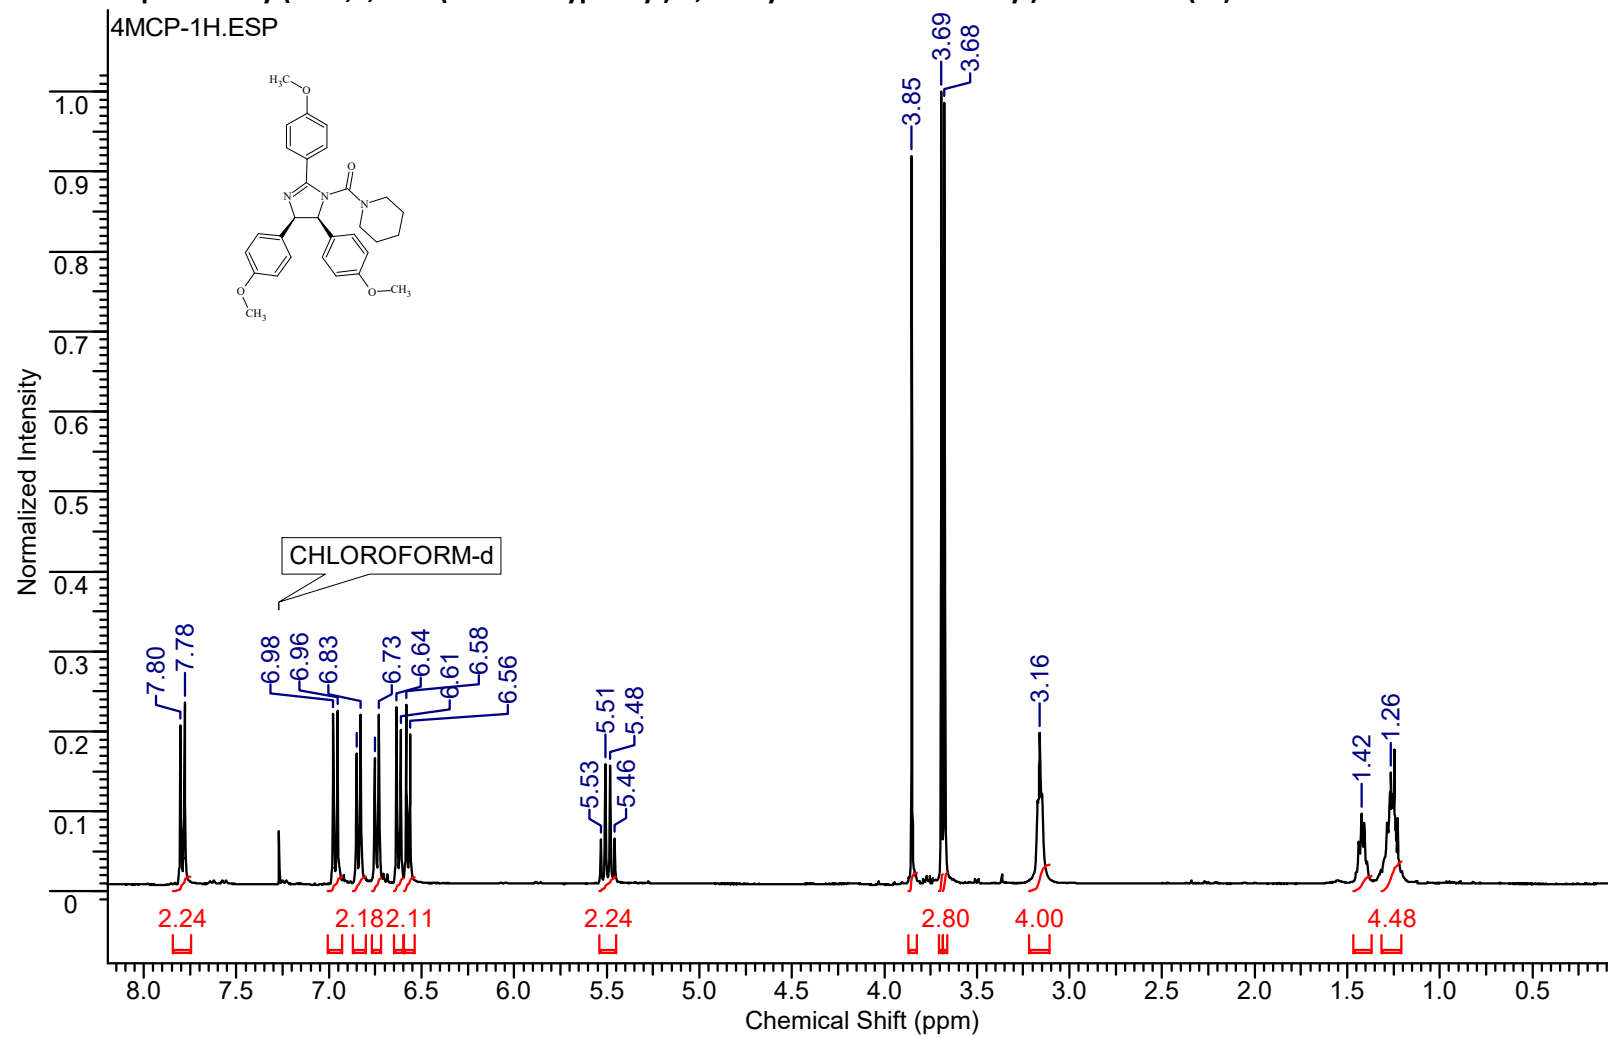

**<sup>13</sup>C NMR Piperidin-1-yl(*cis*-2,4,5-*tris*(4-methoxyphenyl)-4,5-dihydro-1*H*-imidazol-1-yl)methanone (2c).**

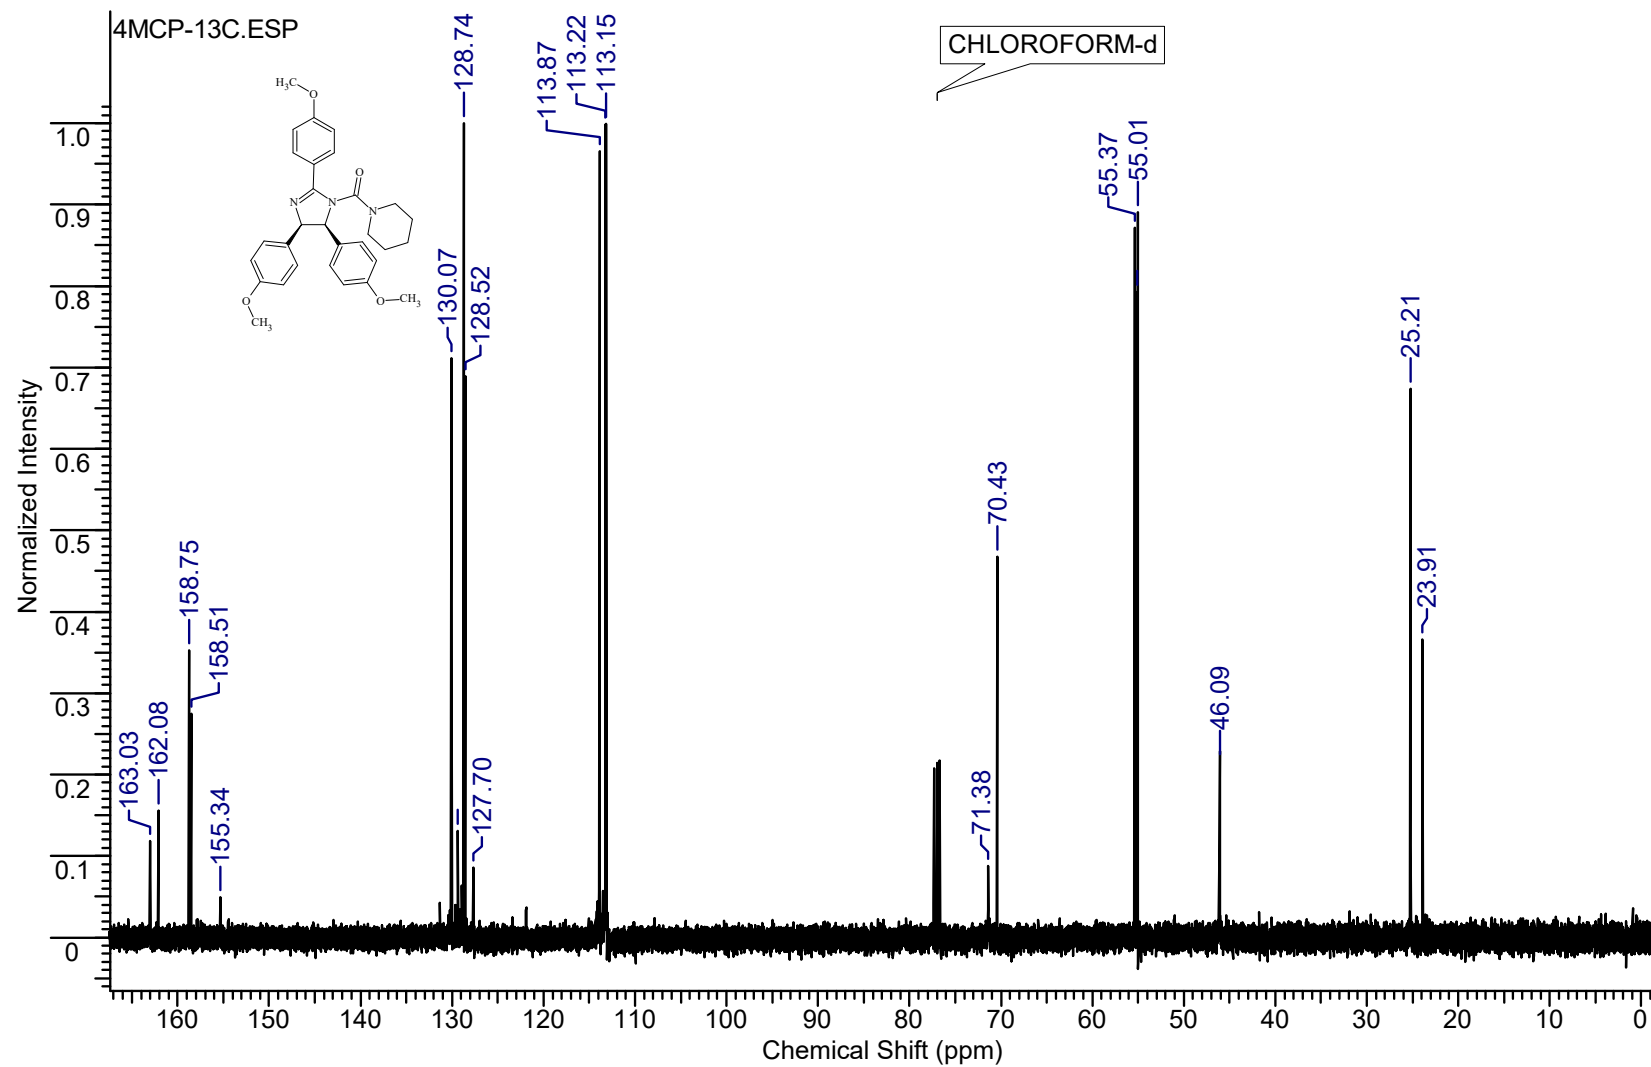

**<sup>1</sup>H NMR (4-Methylpiperidin-1-yl) (*cis*-2,4,5-*tris*(4-methoxyphenyl)-4,5-dihydro-1*H*-imidazol-1-yl)methanone (2d).**

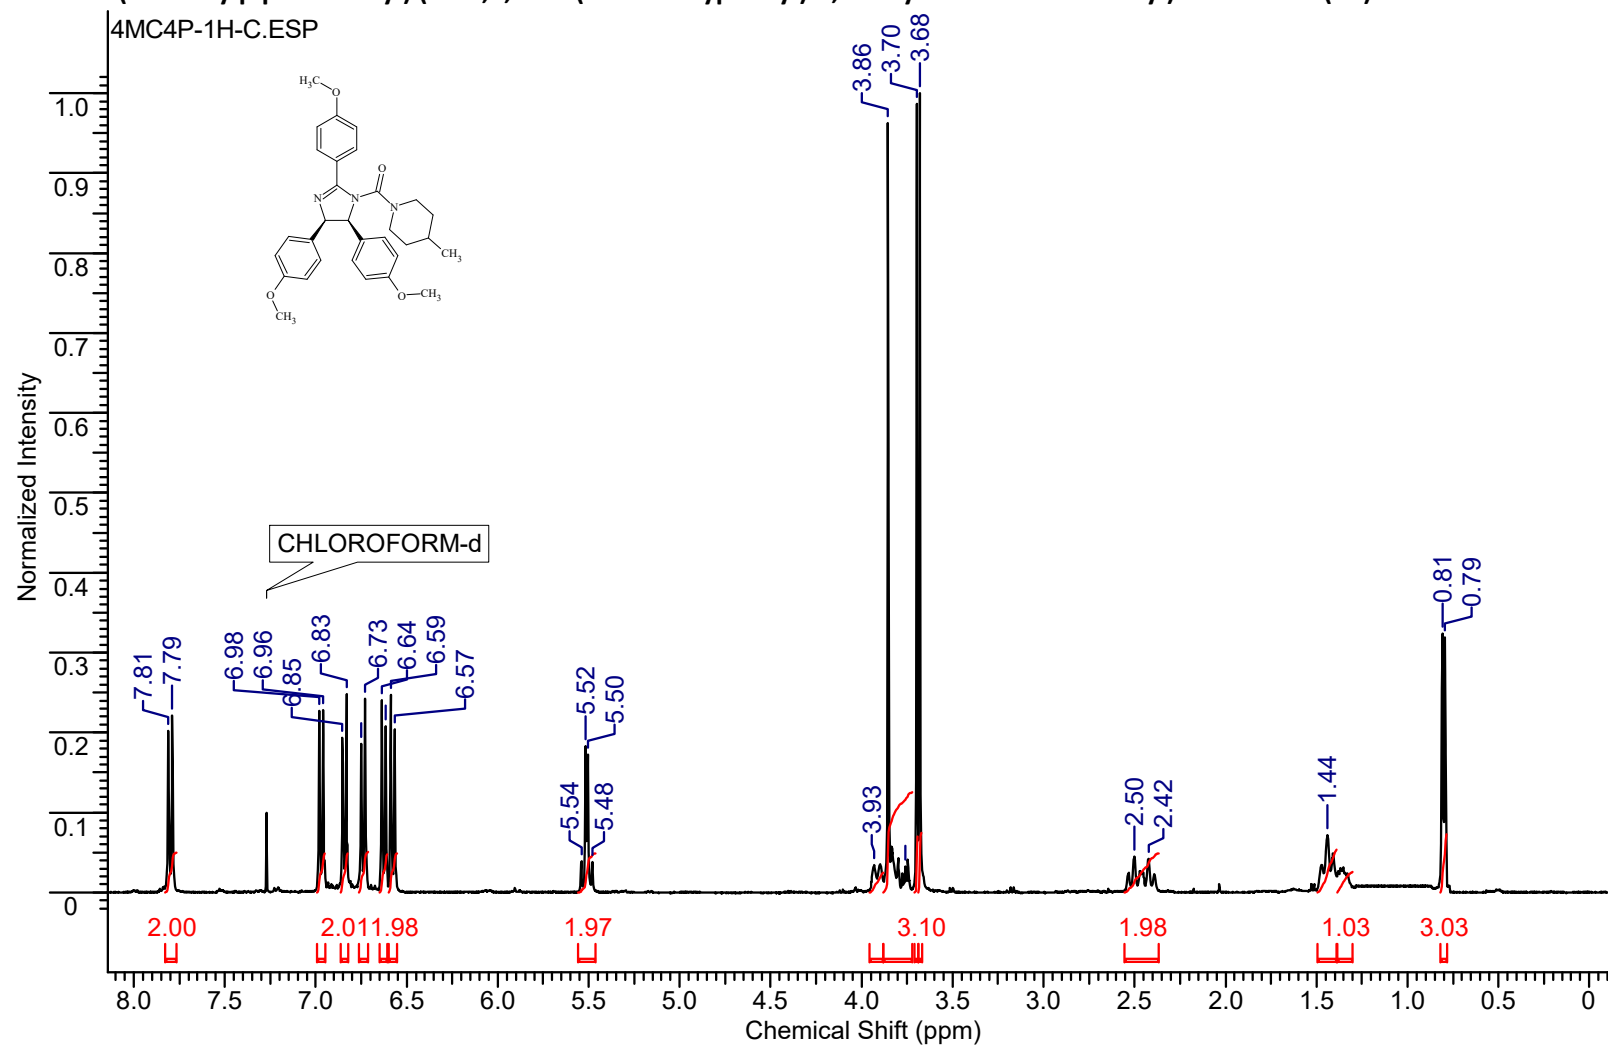

**<sup>13</sup>C NMR (4-Methylpiperidin-1-yl) (*cis*-2,4,5-*tris*(4-methoxyphenyl)-4,5-dihydro-1*H*-imidazol-1-yl)methanone (2d).**

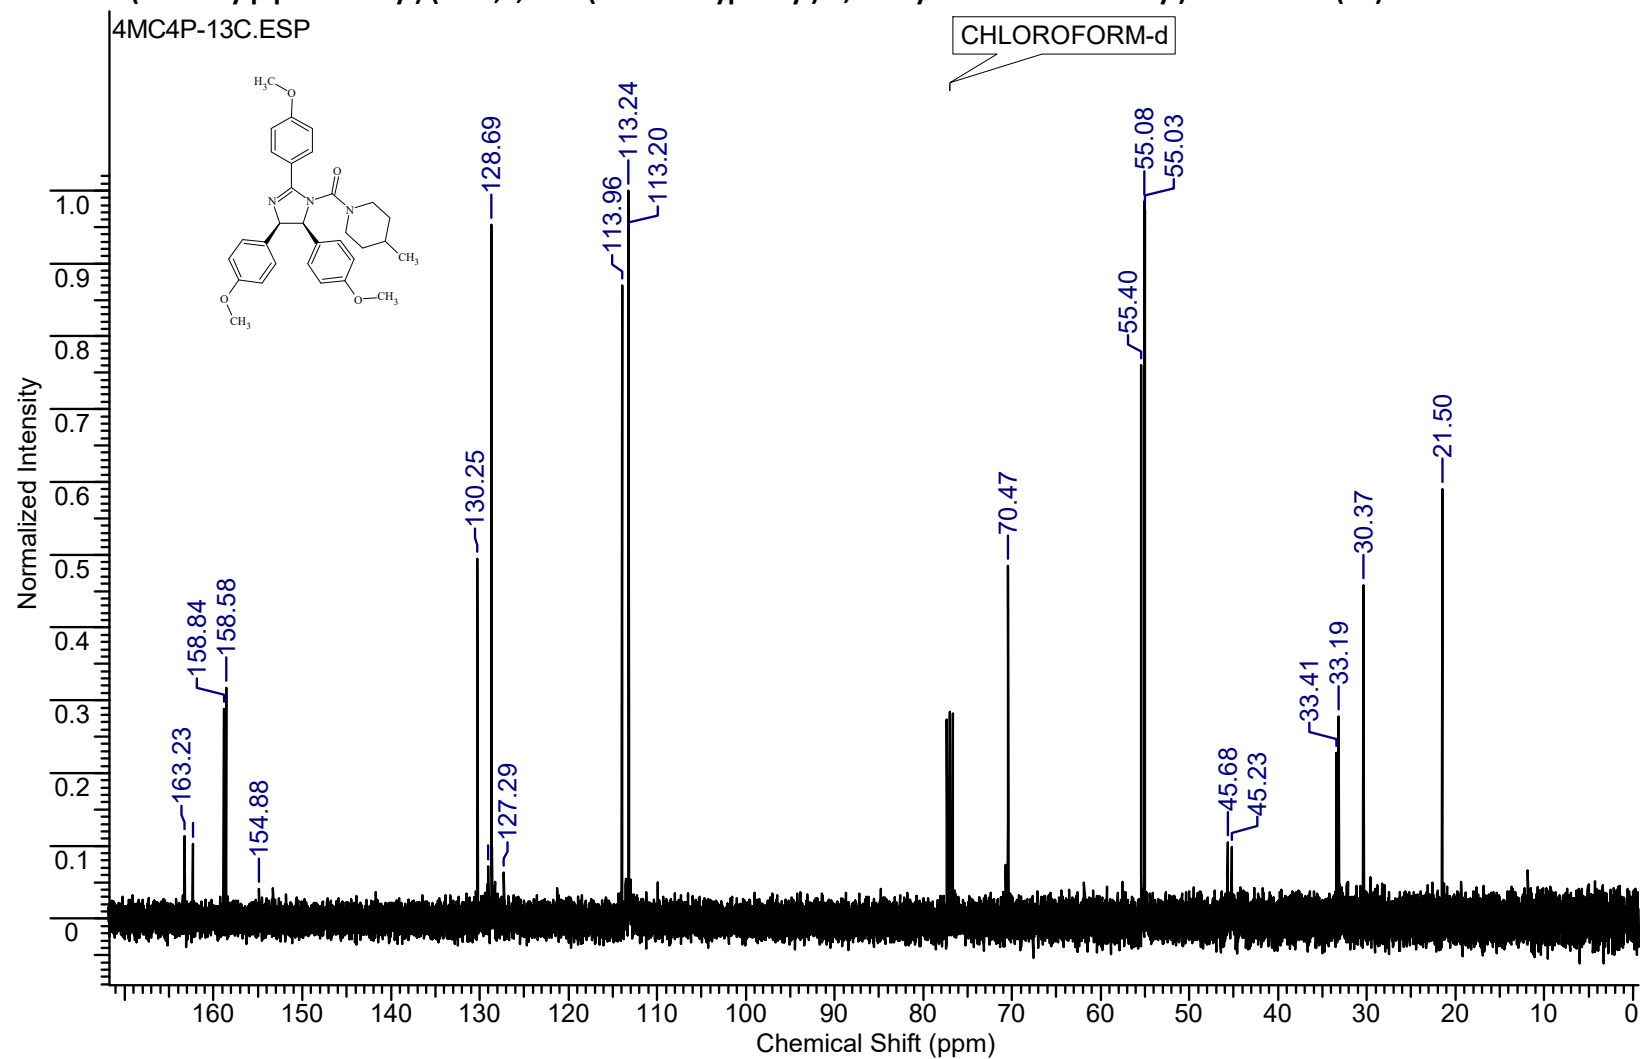

**<sup>1</sup>H NMR Pyrrolidin-1-yl(*cis*-2,4,5-*tris*(4-methoxyphenyl)-4,5-dihydro-1*H*-imidazol-1-yl)methanone (2e).**

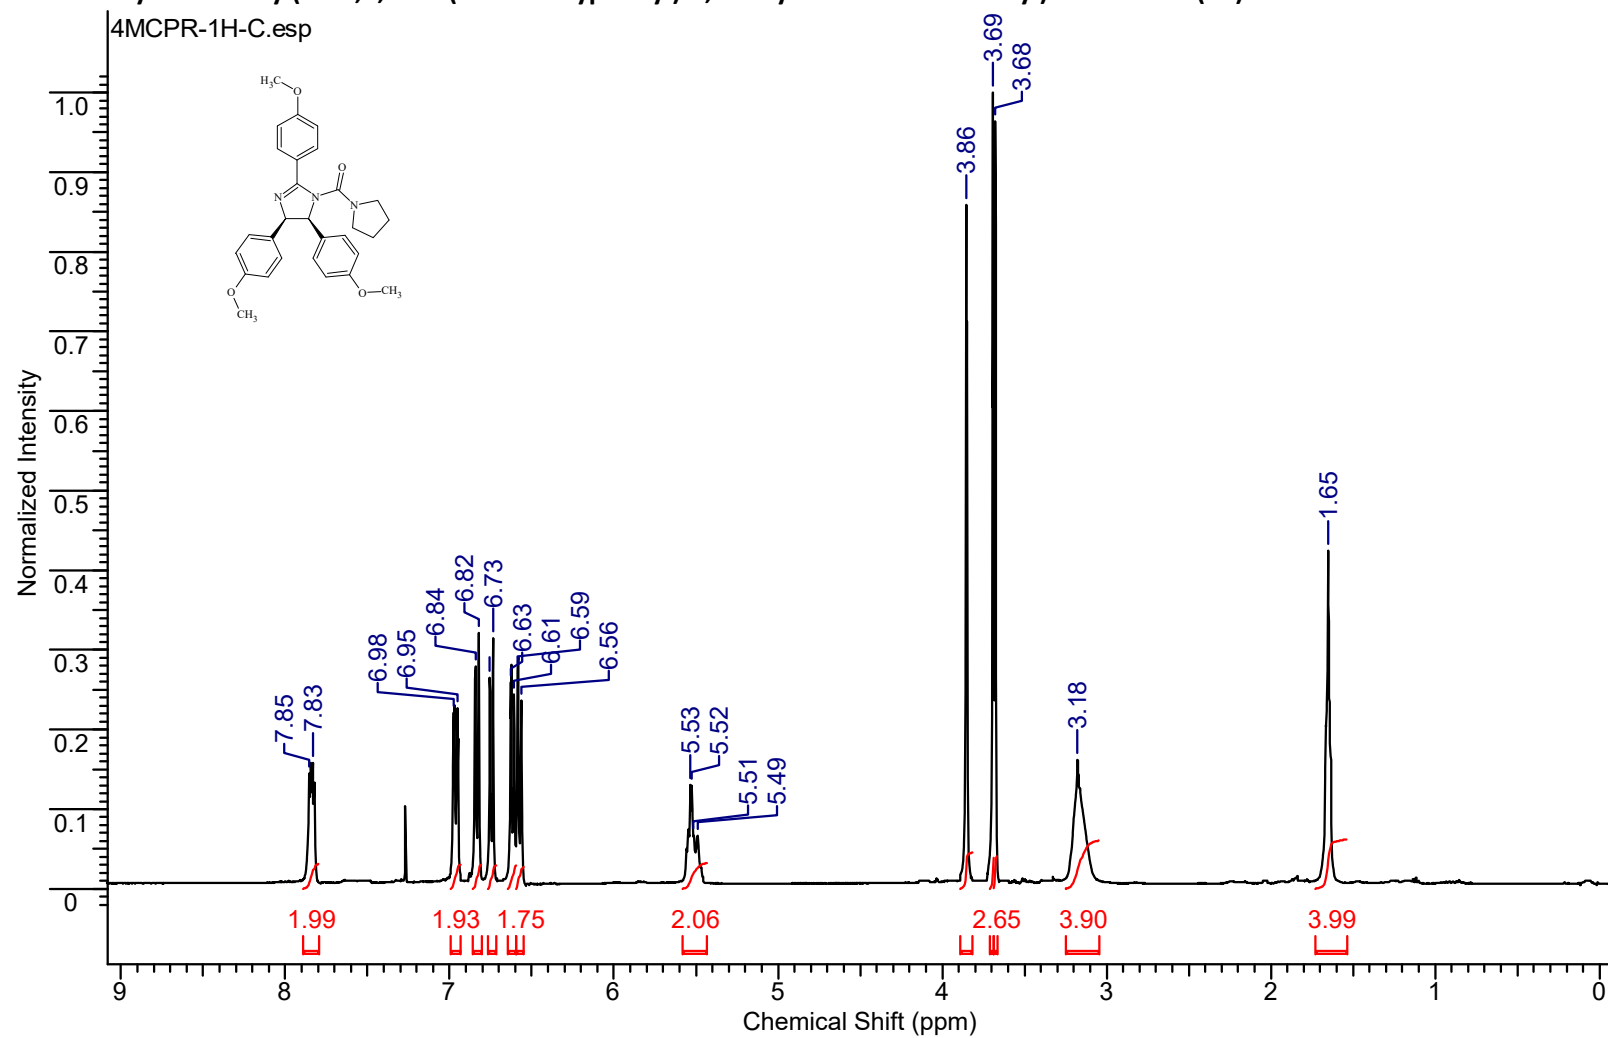

**<sup>13</sup>C NMR Pyrrolidin-1-yl(*cis*-2,4,5-*tris*(4-methoxyphenyl)-4,5-dihydro-1*H*-imidazol-1-yl)methanone (2e).**

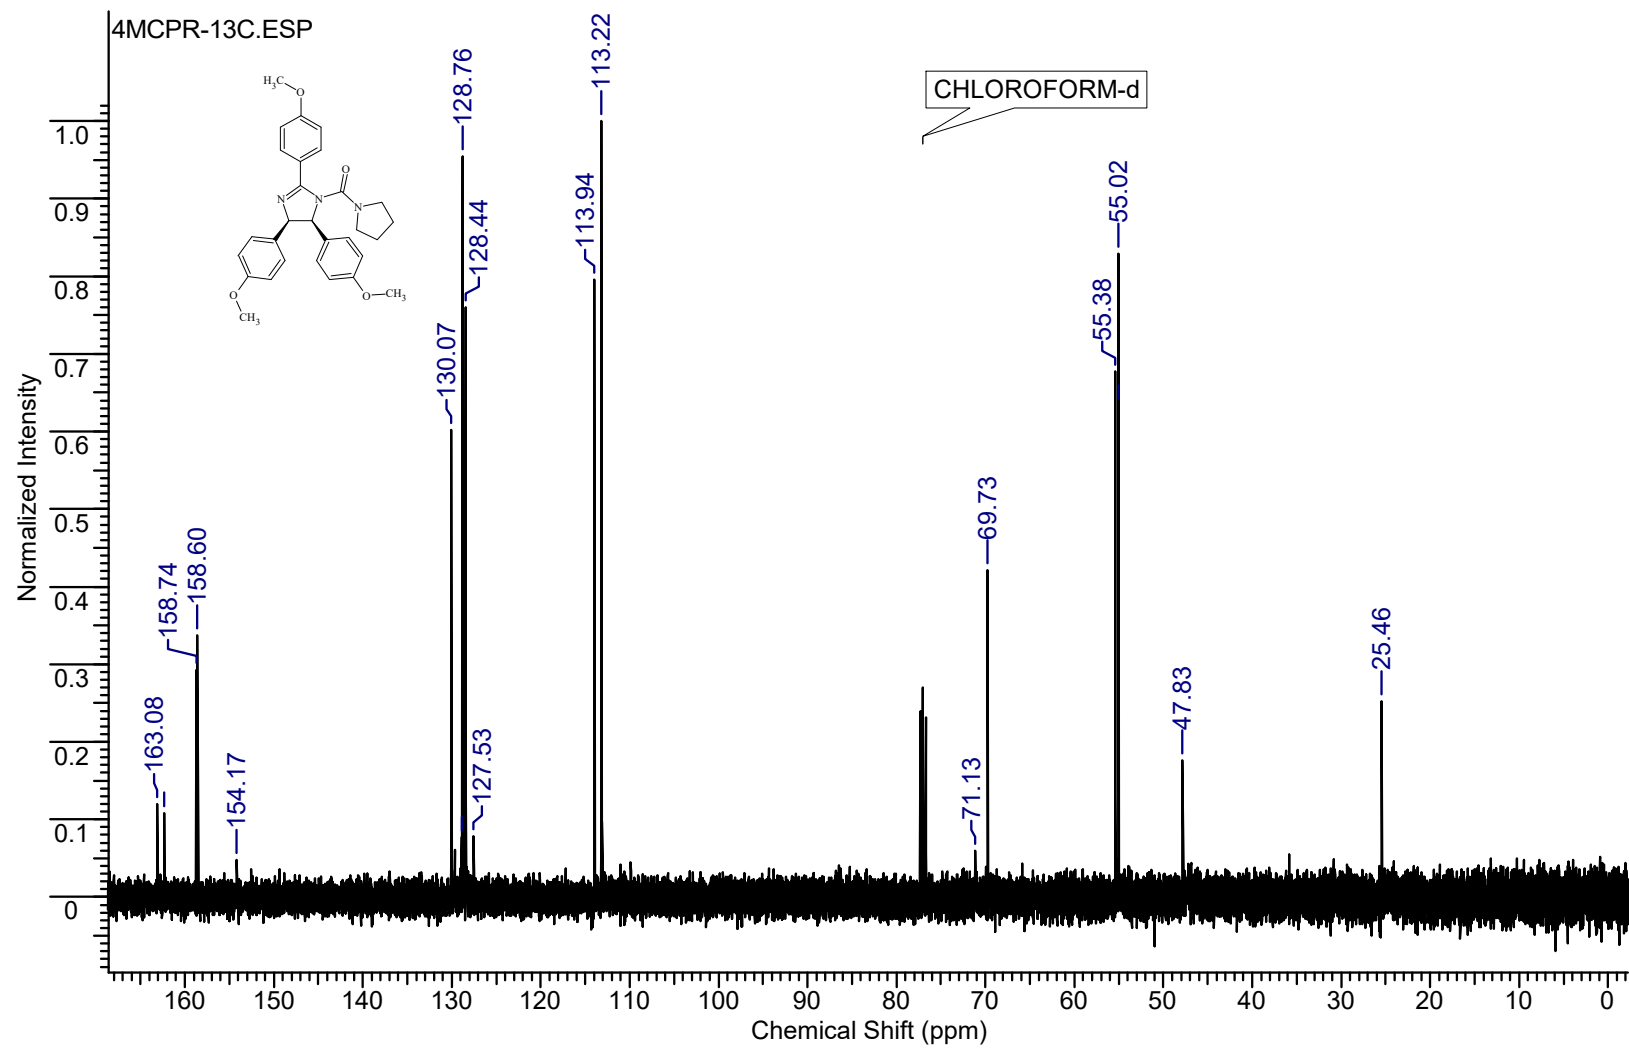

**<sup>1</sup>H NMR Azepan-1-yl(*cis*-2,4,5-*tris*(4-methoxyphenyl)-4,5-dihydro-1*H*-imidazol-1-yl)methanone (2f).**

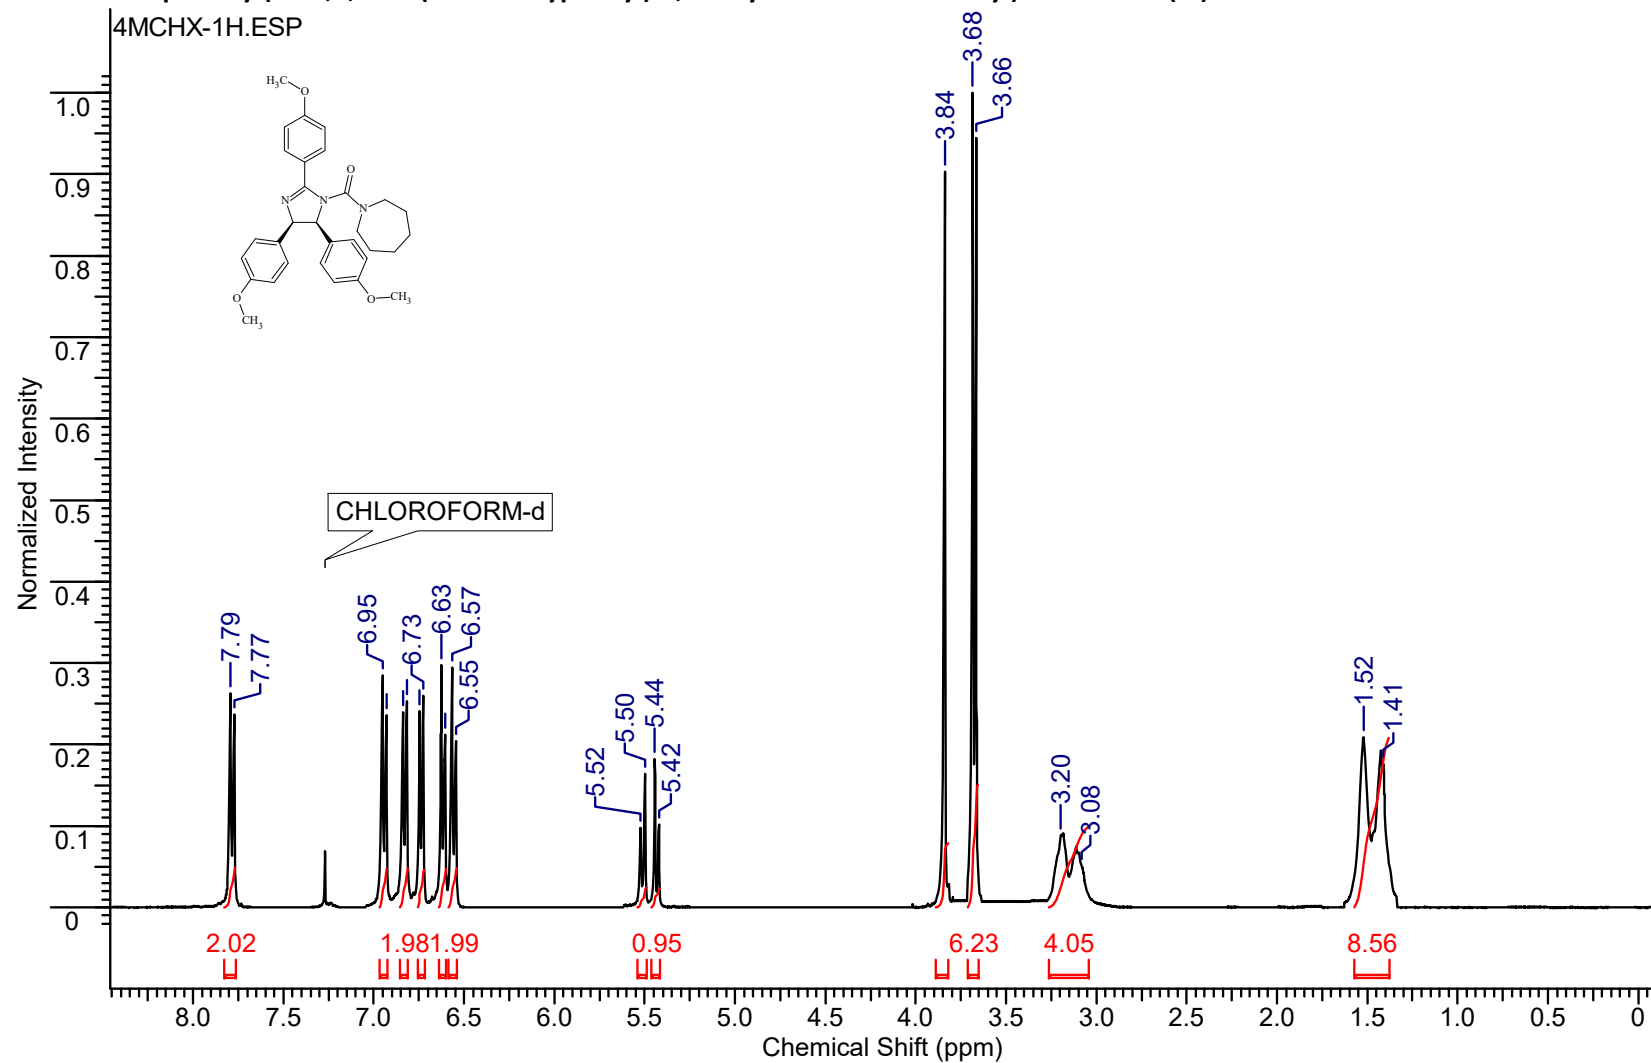

**<sup>13</sup>C NMR Azepan-1-yl(*cis*-2,4,5-*tris*(4-methoxyphenyl)-4,5-dihydro-1*H*-imidazol-1-yl)methanone (2f).**

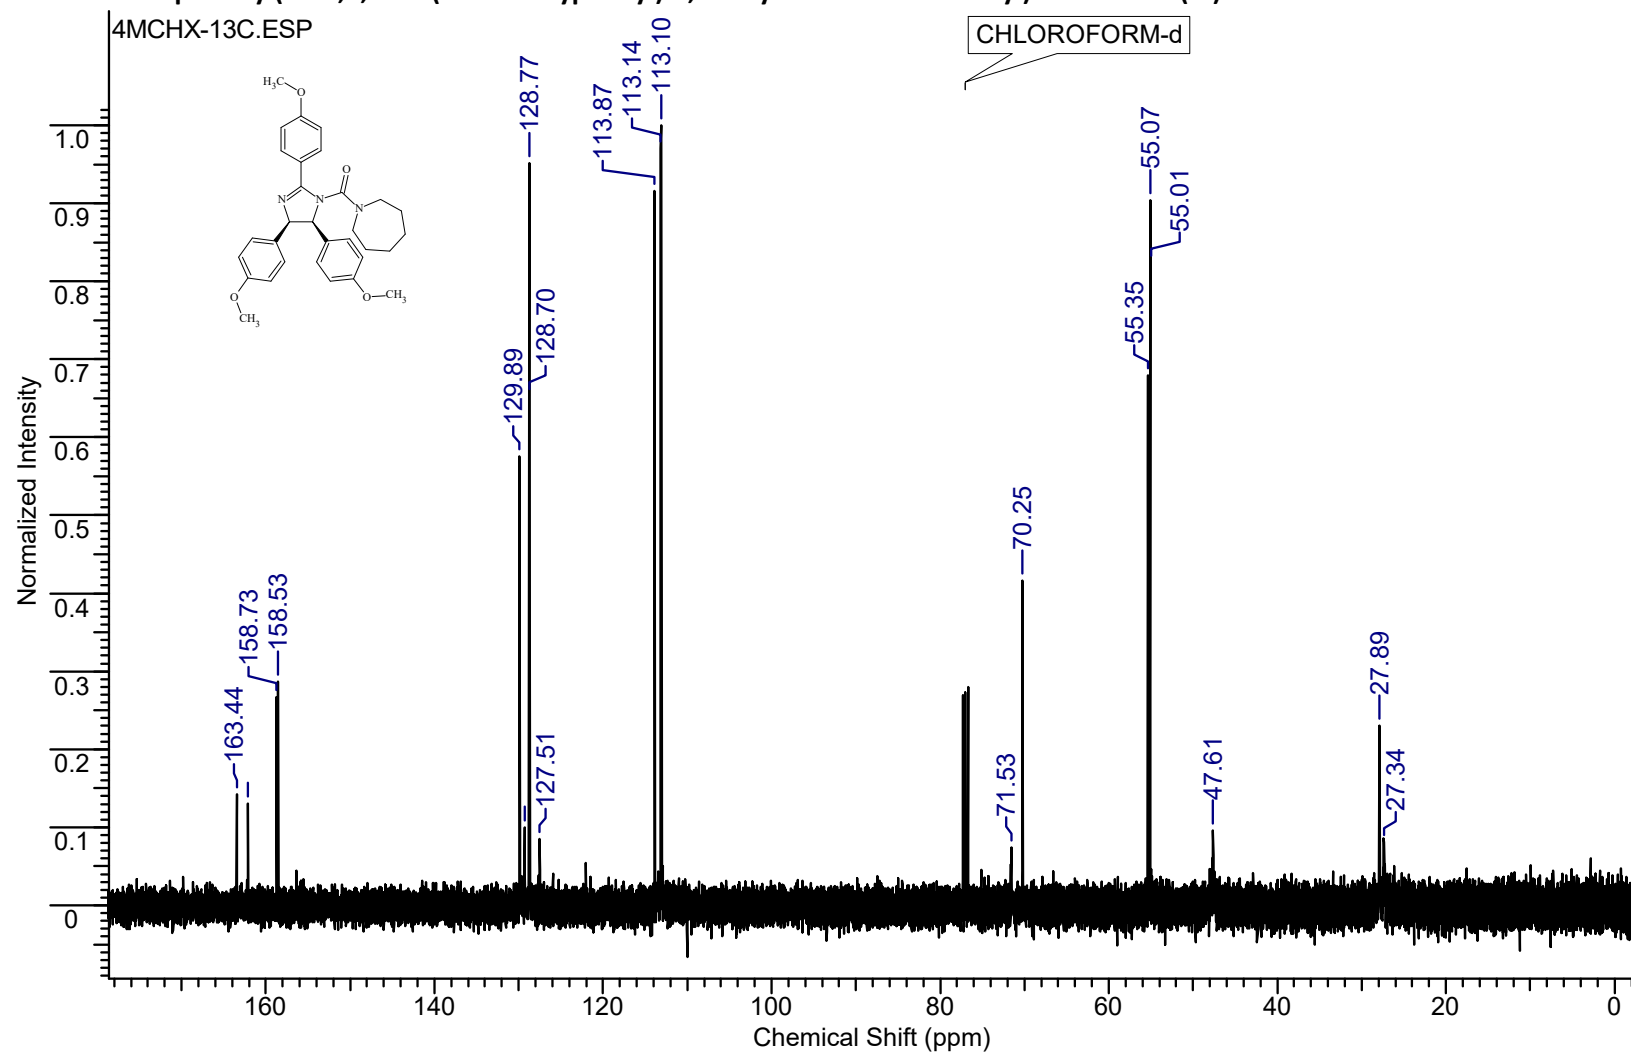

**<sup>1</sup>H NMR *tert*-Butyl 4-(*cis*-2,4,5-*tris*(4-methoxyphenyl)-4,5-dihydro-1*H*-imidazole-1-carbonyl)piperazine-1-carboxylate (2g).**

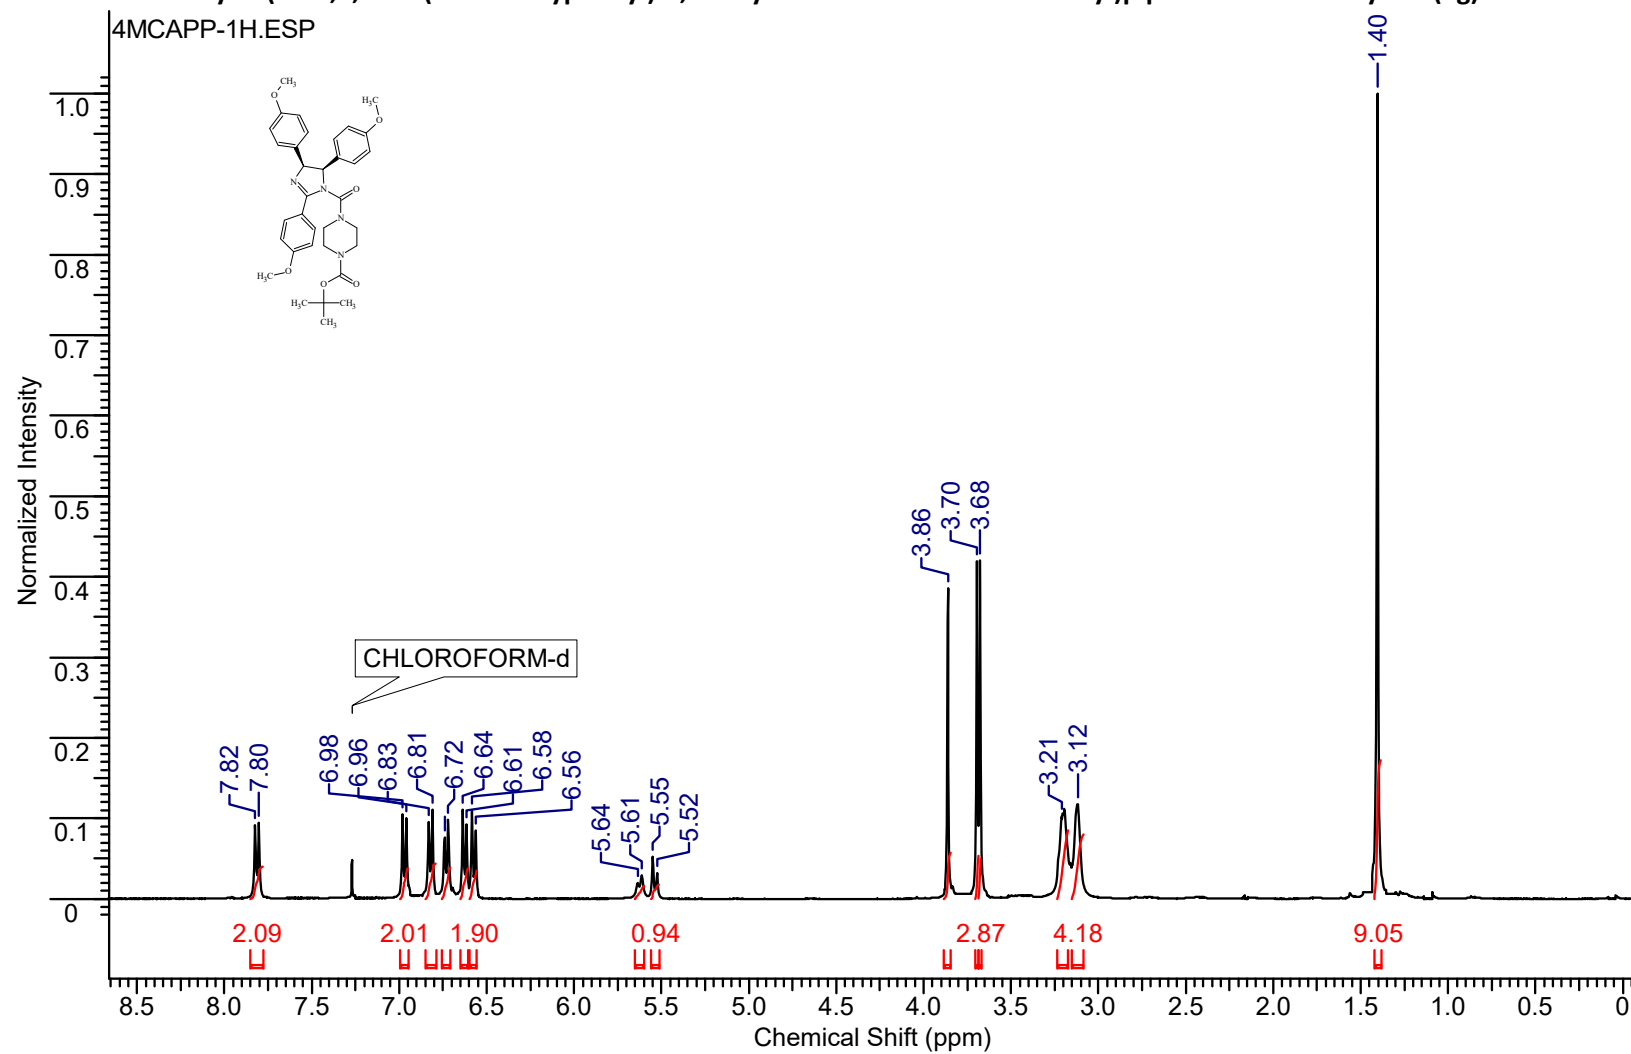

**<sup>13</sup>C NMR *tert*-Butyl 4-(*cis*-2,4,5-*tris*(4-methoxyphenyl)-4,5-dihydro-1*H*-imidazole-1-carbonyl)piperazine-1-carboxylate (2g).**

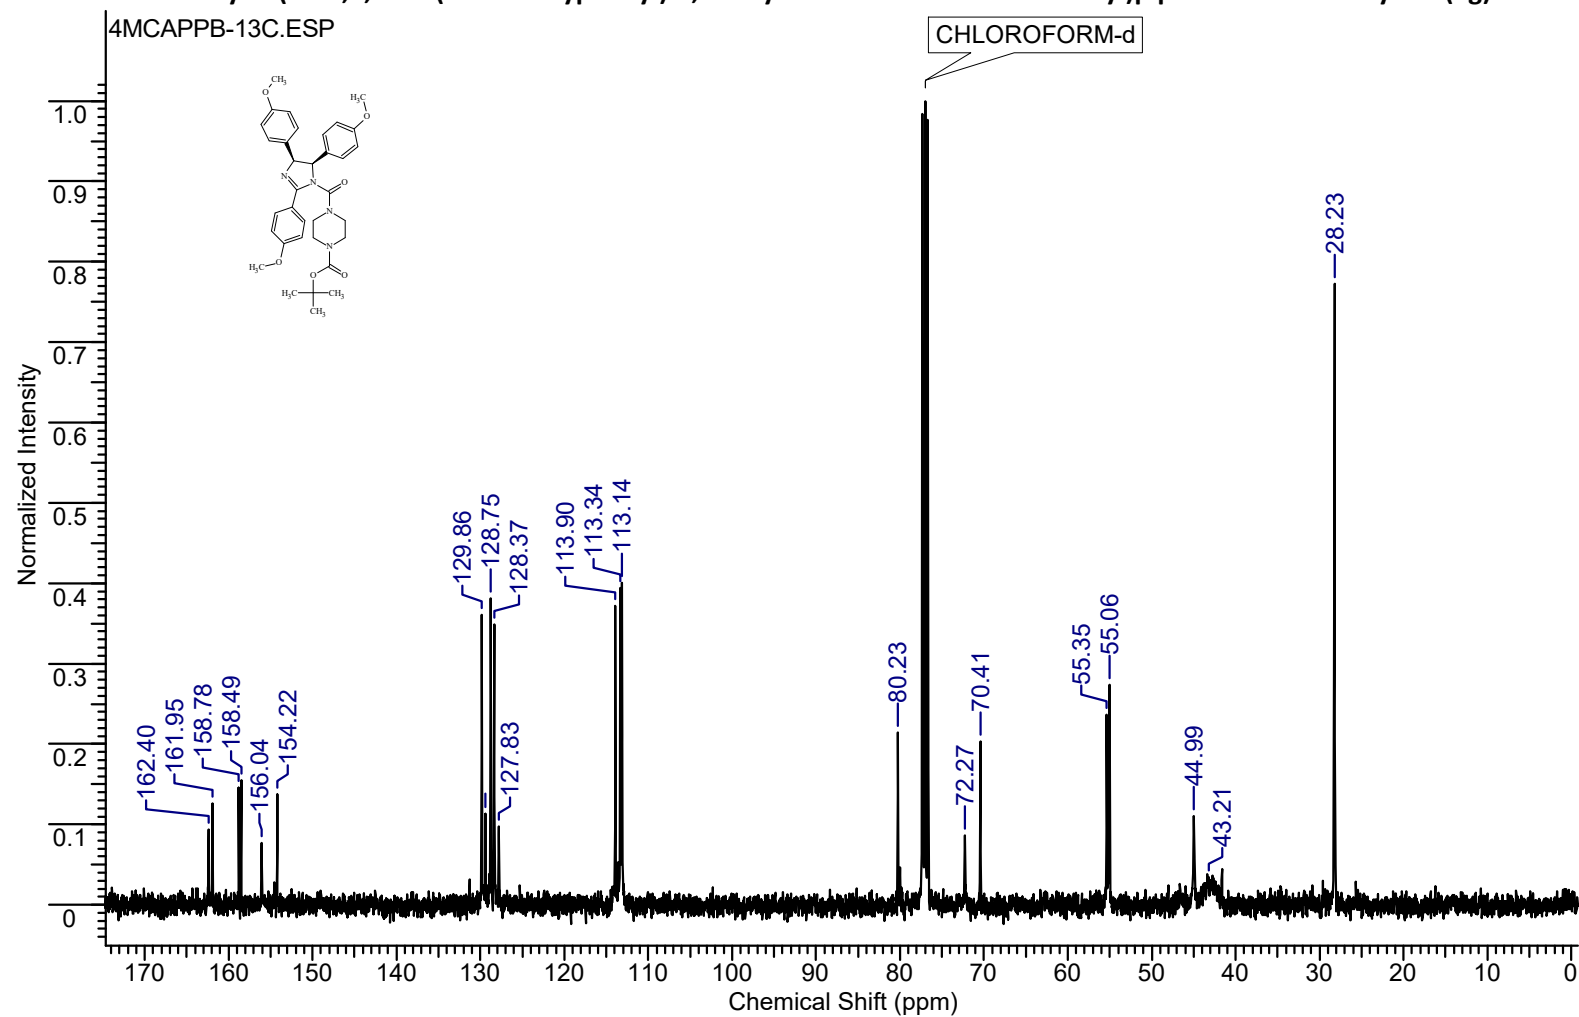

**<sup>1</sup>H NMR Piperidin-1-yl(*cis*-2,4,5-*tris*(2-methoxyphenyl)-4,5-dihydro-1*H*-imidazol-1-yl)methanone (2h).**

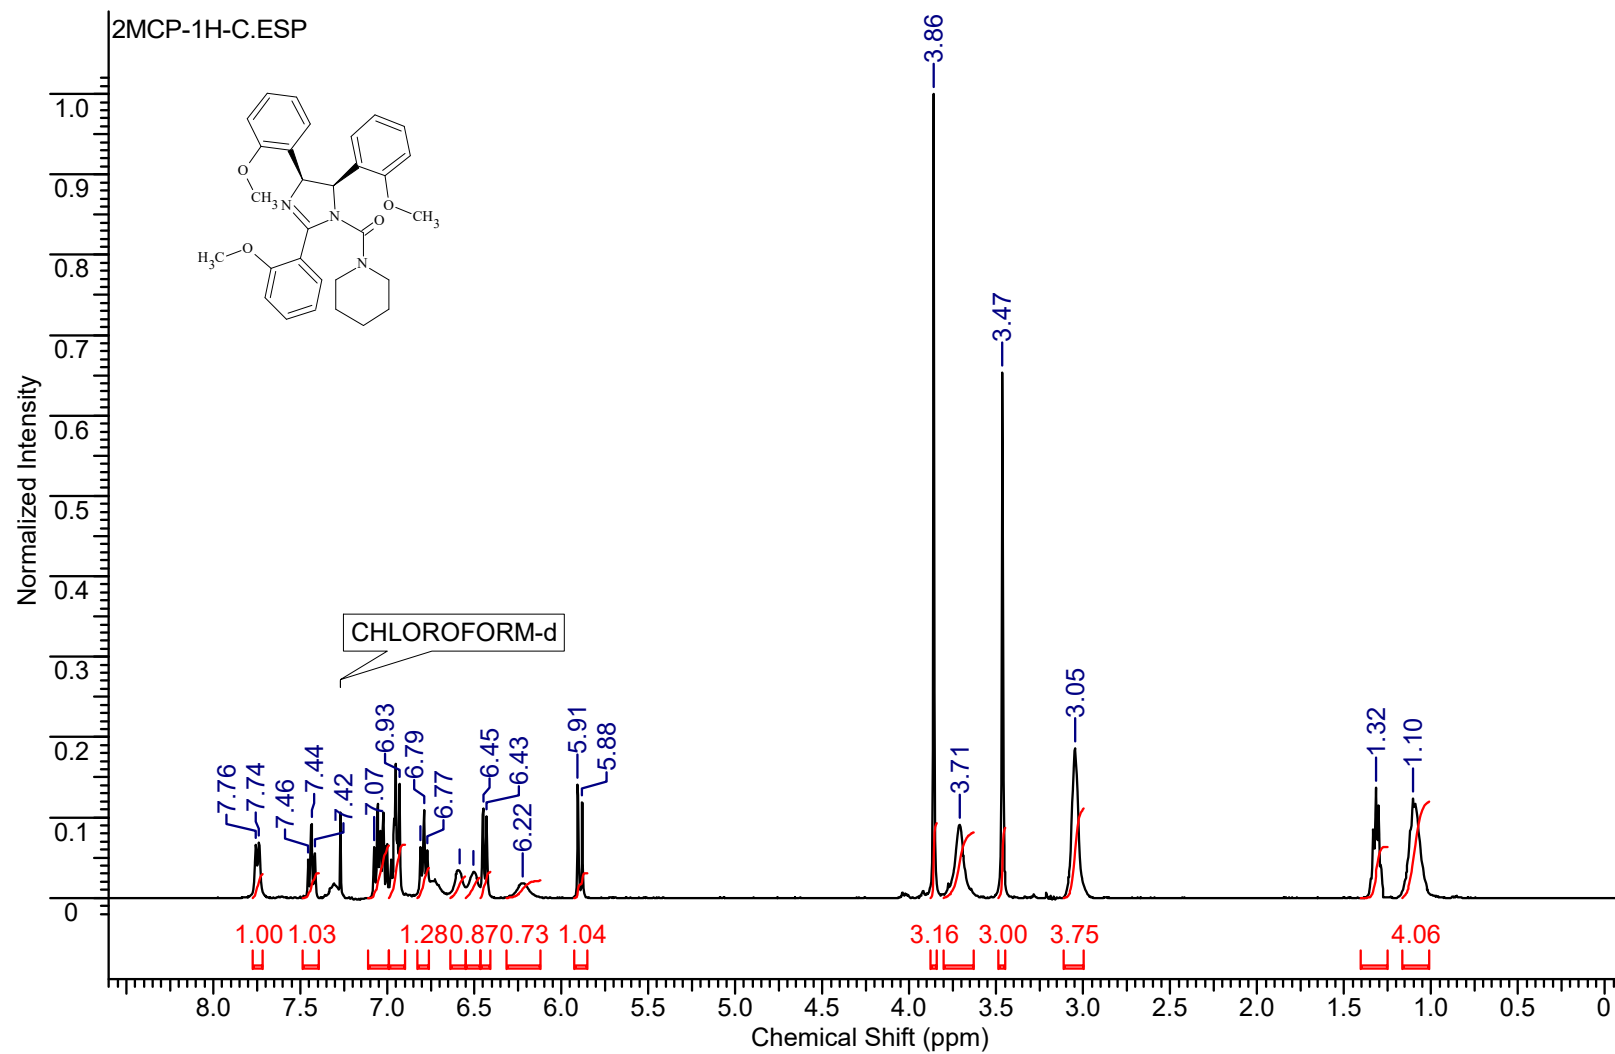

**<sup>13</sup>C NMR Piperidin-1-yl(*cis*-2,4,5-*tris*(2-methoxyphenyl)-4,5-dihydro-1*H*-imidazol-1-yl)methanone (2h).**

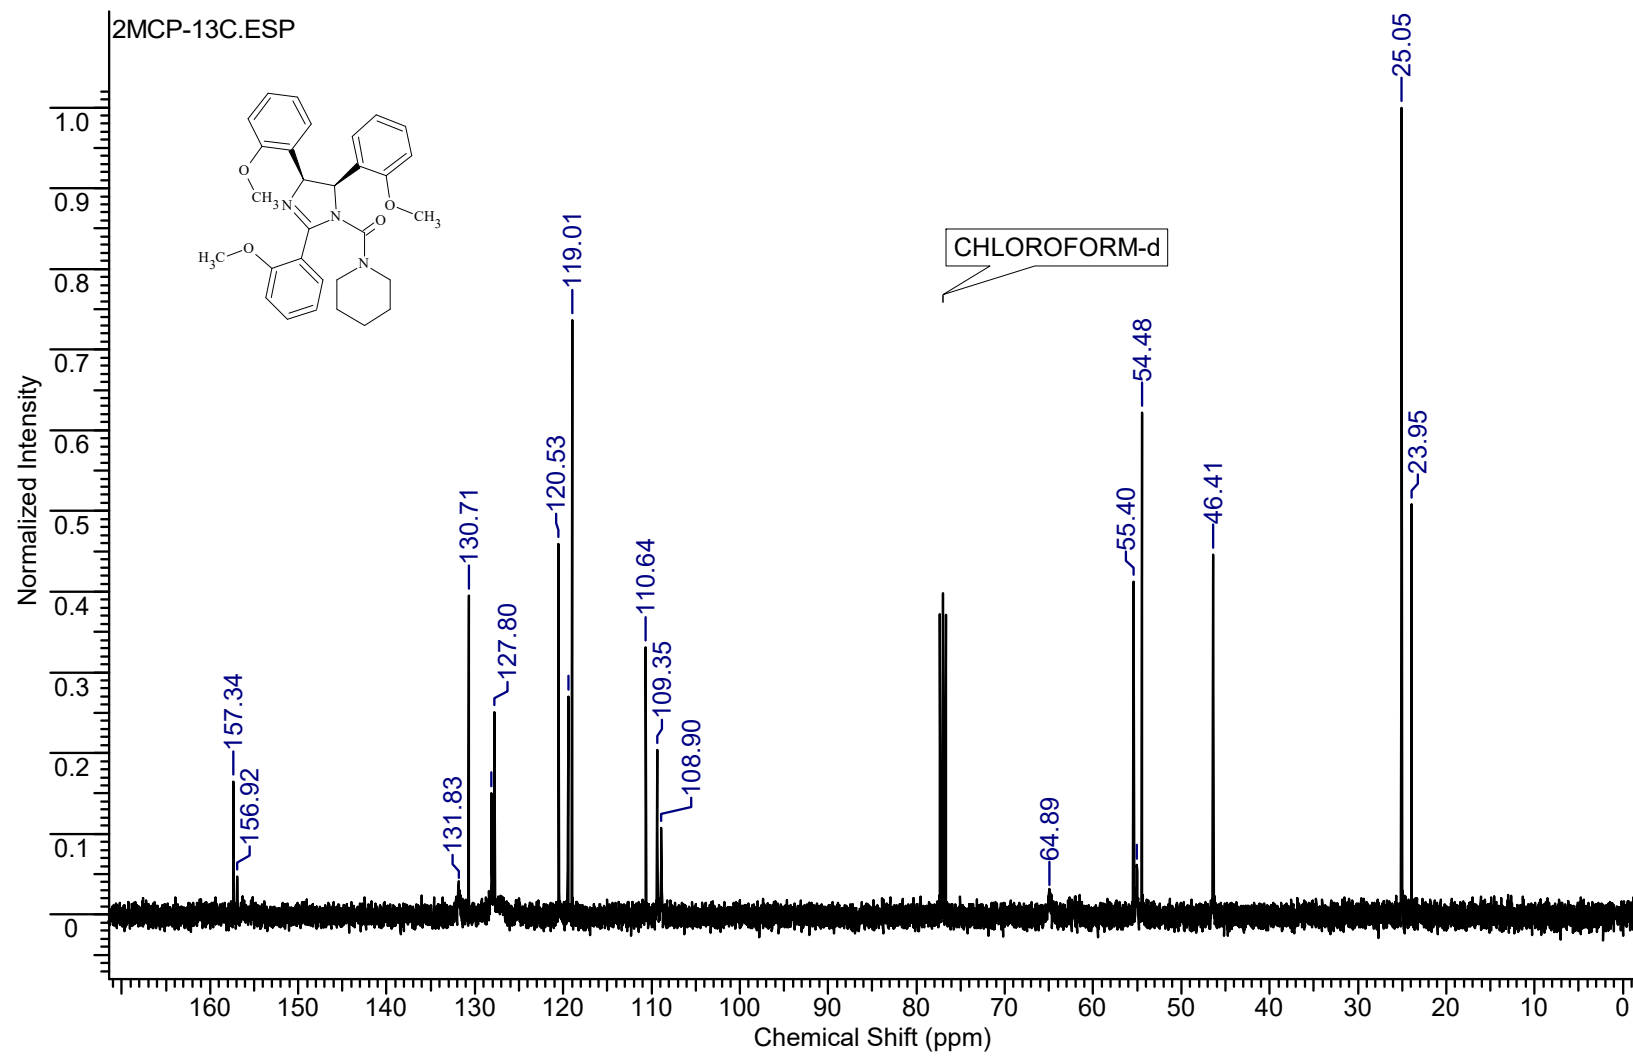

**<sup>1</sup>H NMR *Cis-N,N*-diethyl-2,4,5-*tris*(2,4-dimethoxyphenyl)-4,5-dihydro-1*H*-imidazole-1-carboxamide (2i).**

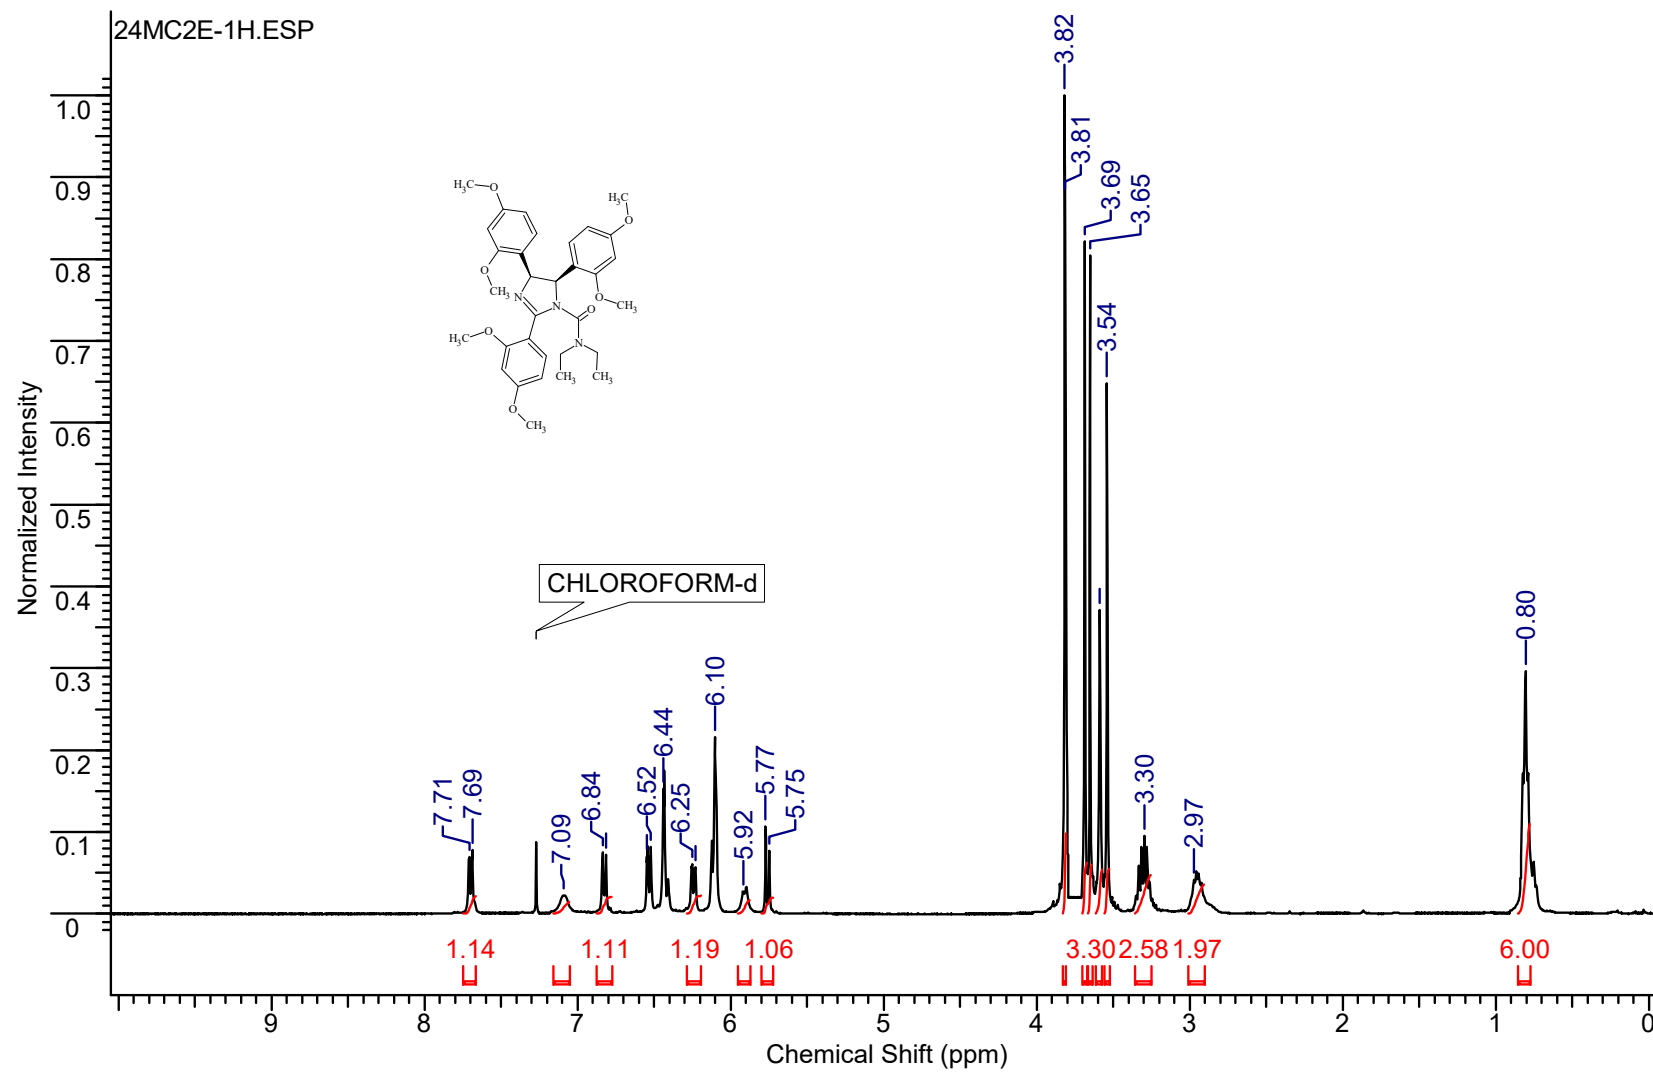

**<sup>13</sup>C NMR *Cis-N,N*-diethyl-2,4,5-*tris*(2,4-dimethoxyphenyl)-4,5-dihydro-1*H*-imidazole-1-carboxamide (2i).**

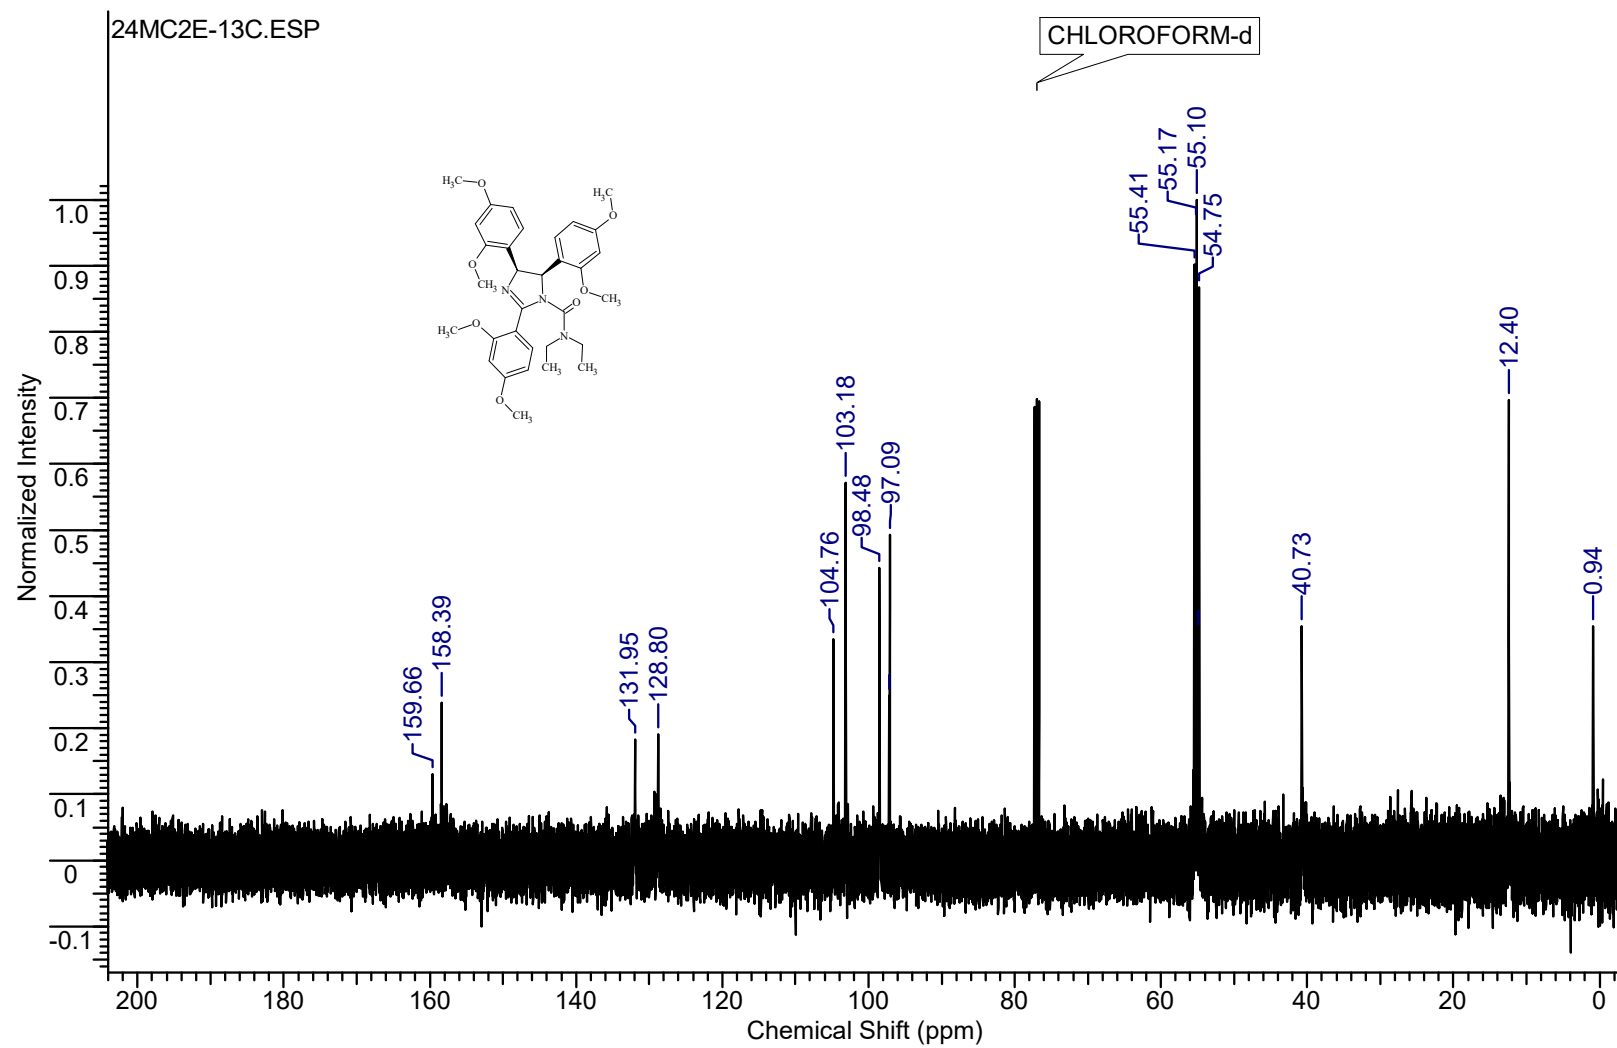

**<sup>1</sup>H NMR 4-[[*Cis*-2,4,5-*tris*(2,4-dimethoxyphenyl)-4,5-dihydro-1*H*-imidazol-1-yl]carbonyl]morpholine (2j).**

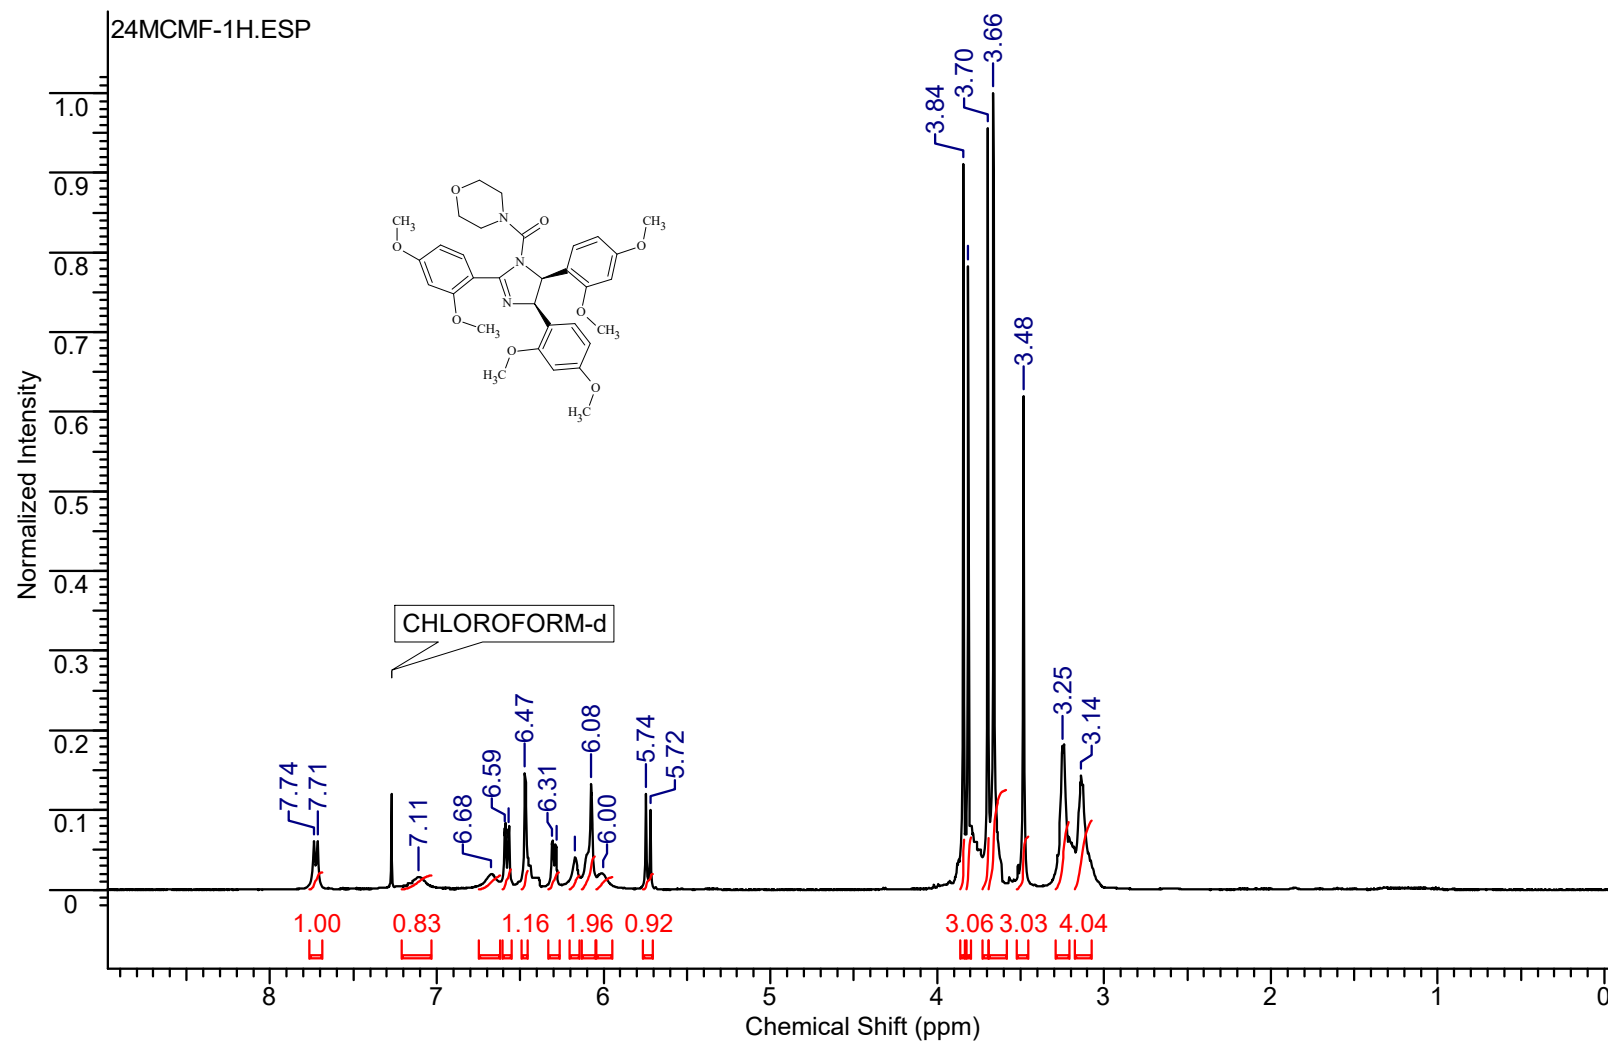

**<sup>13</sup>C NMR 4-*[(Cis-2,4,5-tris(2,4-dimethoxyphenyl)-4,5-dihydro-1H-imidazol-1-yl)carbonyl]morpholine (2j)*.**

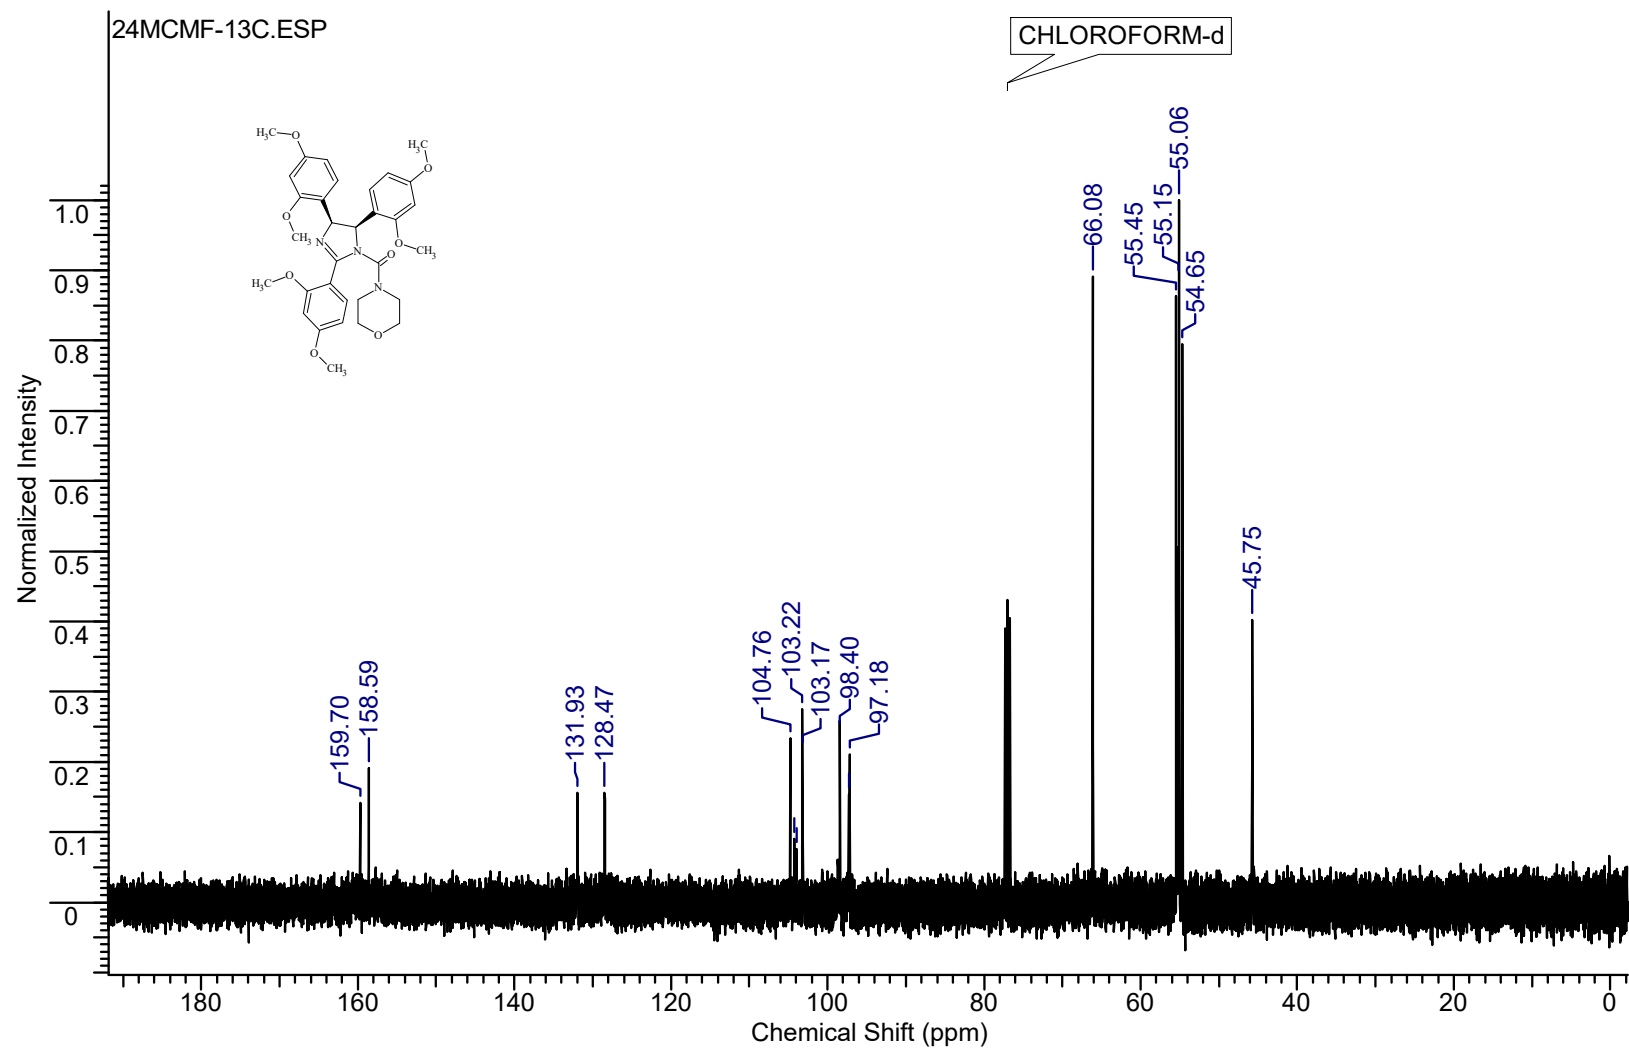

**<sup>1</sup>H NMR Piperidin-1-yl(*cis*-2,4,5-*tris*(2,4-dimethoxyphenyl)-4,5-dihydro-1*H*-imidazol-1-yl)methanone (2k).**

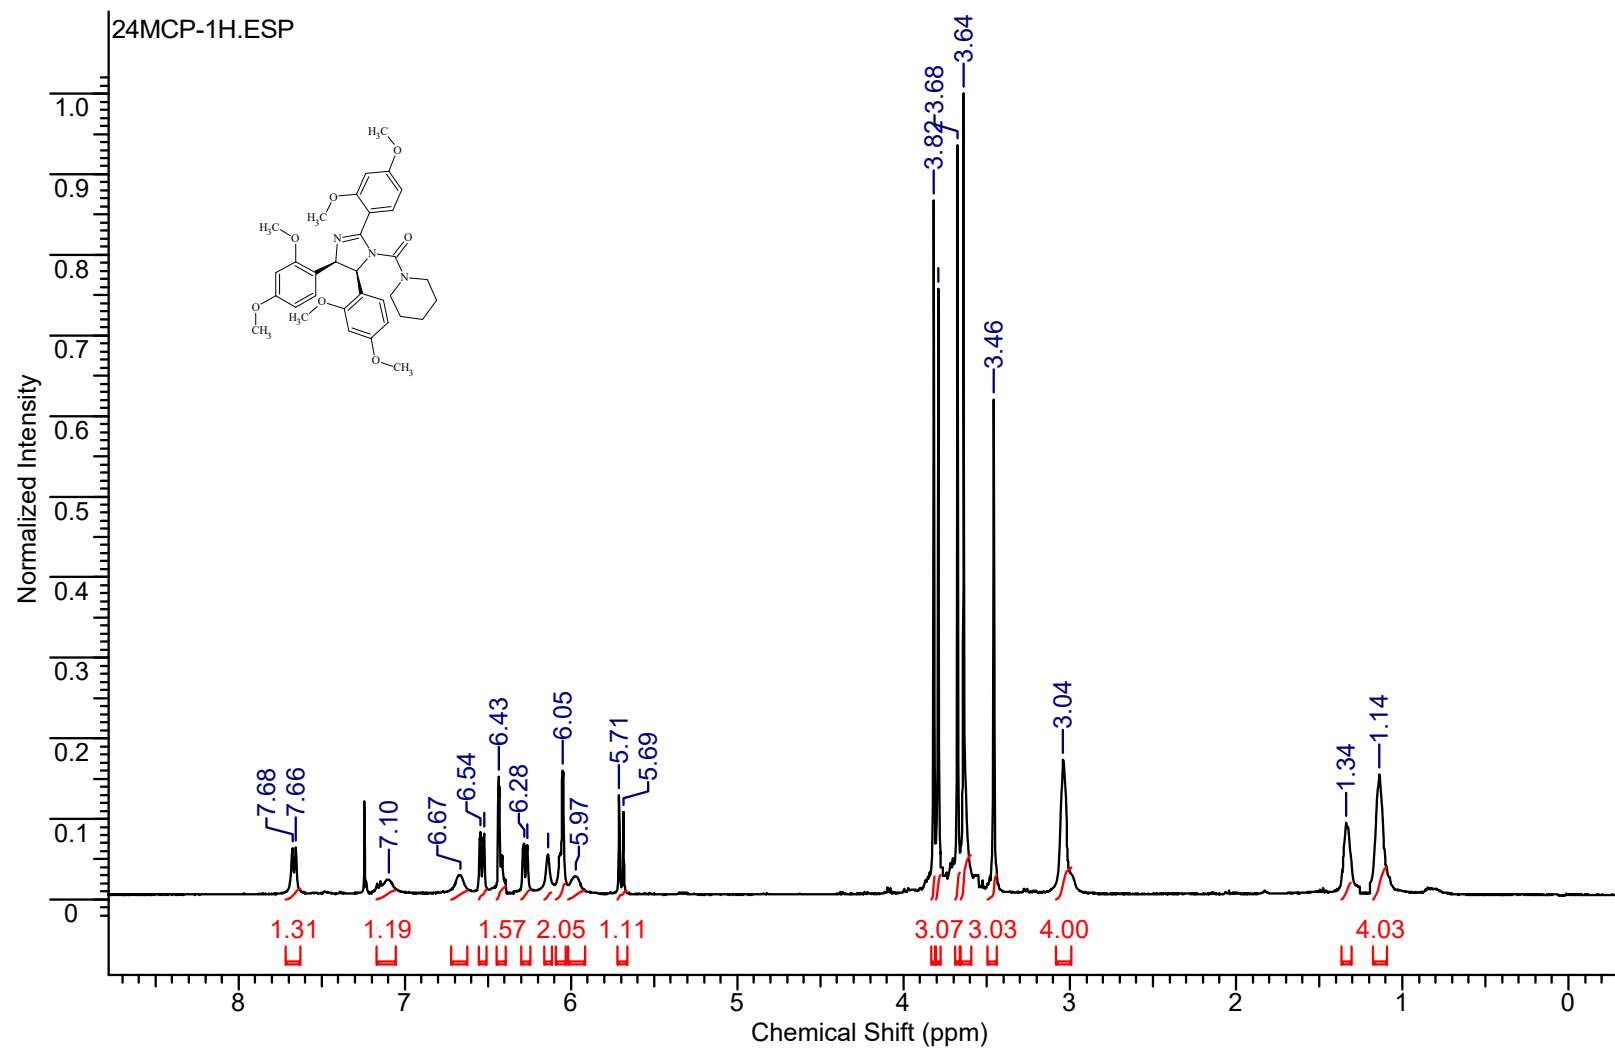

**<sup>13</sup>C NMR Piperidin-1-yl(*cis*-2,4,5-*tris*(2,4-dimethoxyphenyl)-4,5-dihydro-1*H*-imidazol-1-yl)methanone (2k).**

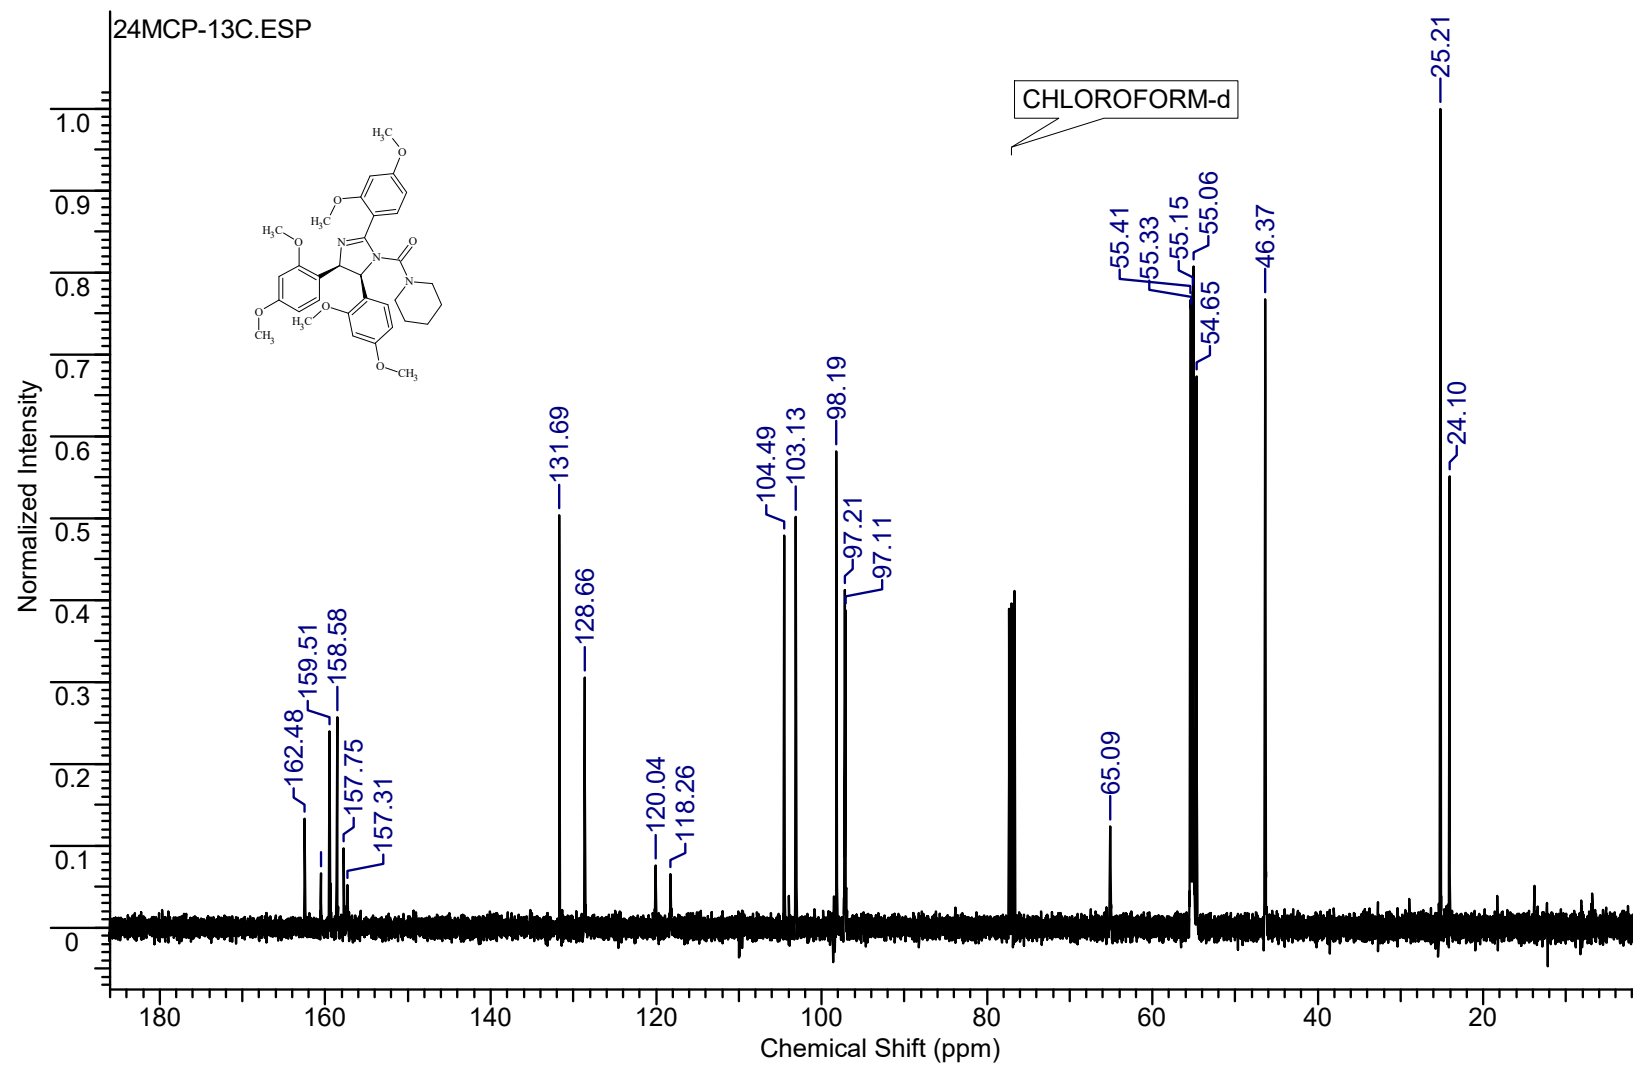

**<sup>1</sup>H NMR (4-Methylpiperidin-1-yl)(*cis*-2,4,5-*tris*(2,4-methoxyphenyl)-4,5-dihydro-1*H*-imidazol-1-yl)methanone (2I).**

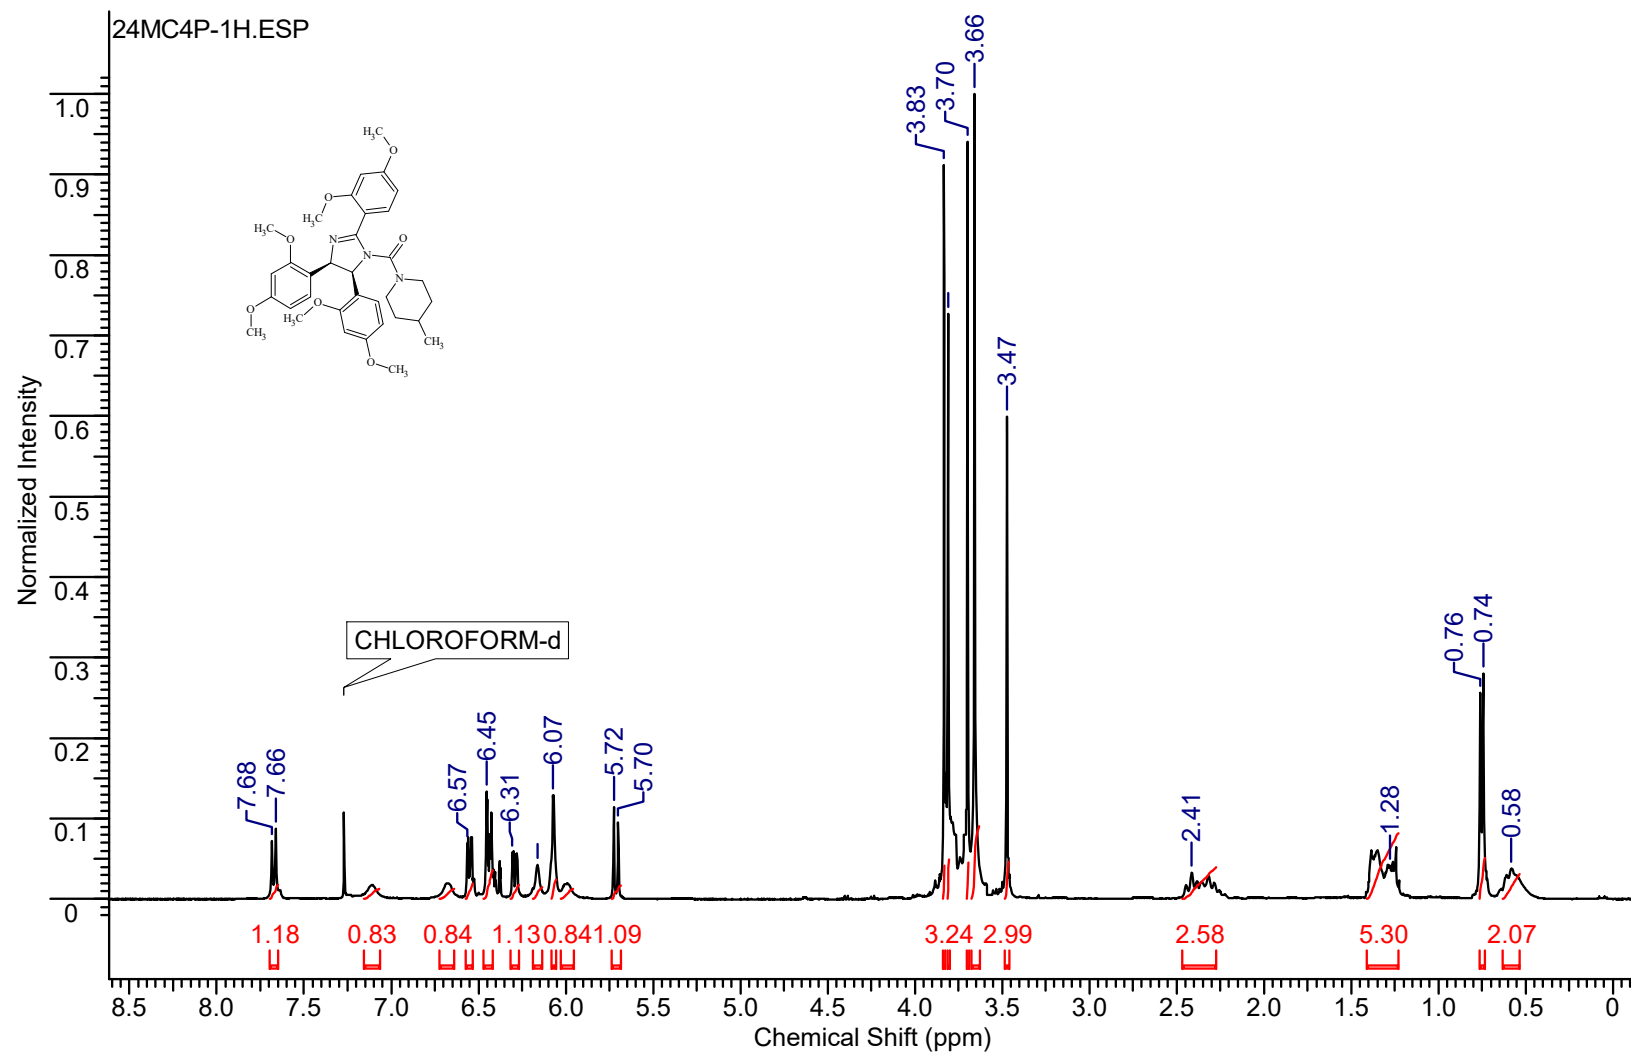

**<sup>13</sup>C NMR (4-Methylpiperidin-1-yl)(*cis*-2,4,5-*tris*(2,4-methoxyphenyl)-4,5-dihydro-1*H*-imidazol-1-yl)methanone (2l).**

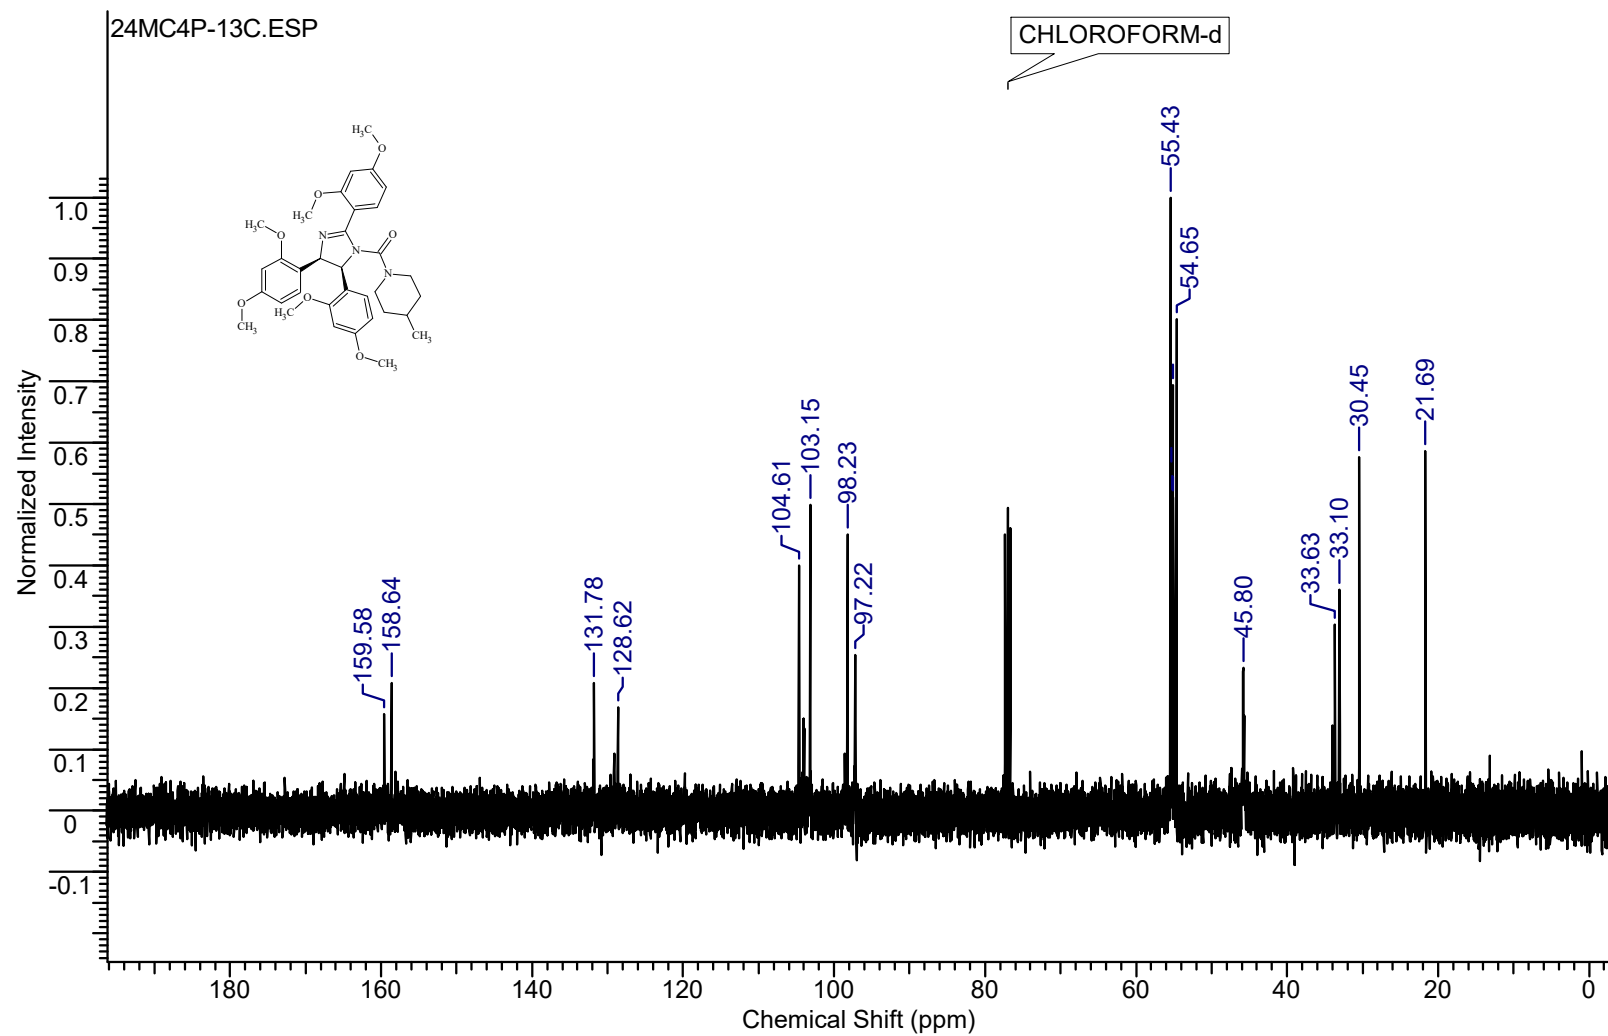

**<sup>1</sup>H NMR *tert*-Butyl 4-(*cis*-2,4,5-*tris*(2,4-dimethoxyphenyl)-4,5-dihydro-1*H*-imidazole-1-carbonyl)piperazine-1-carboxylate (2m).**

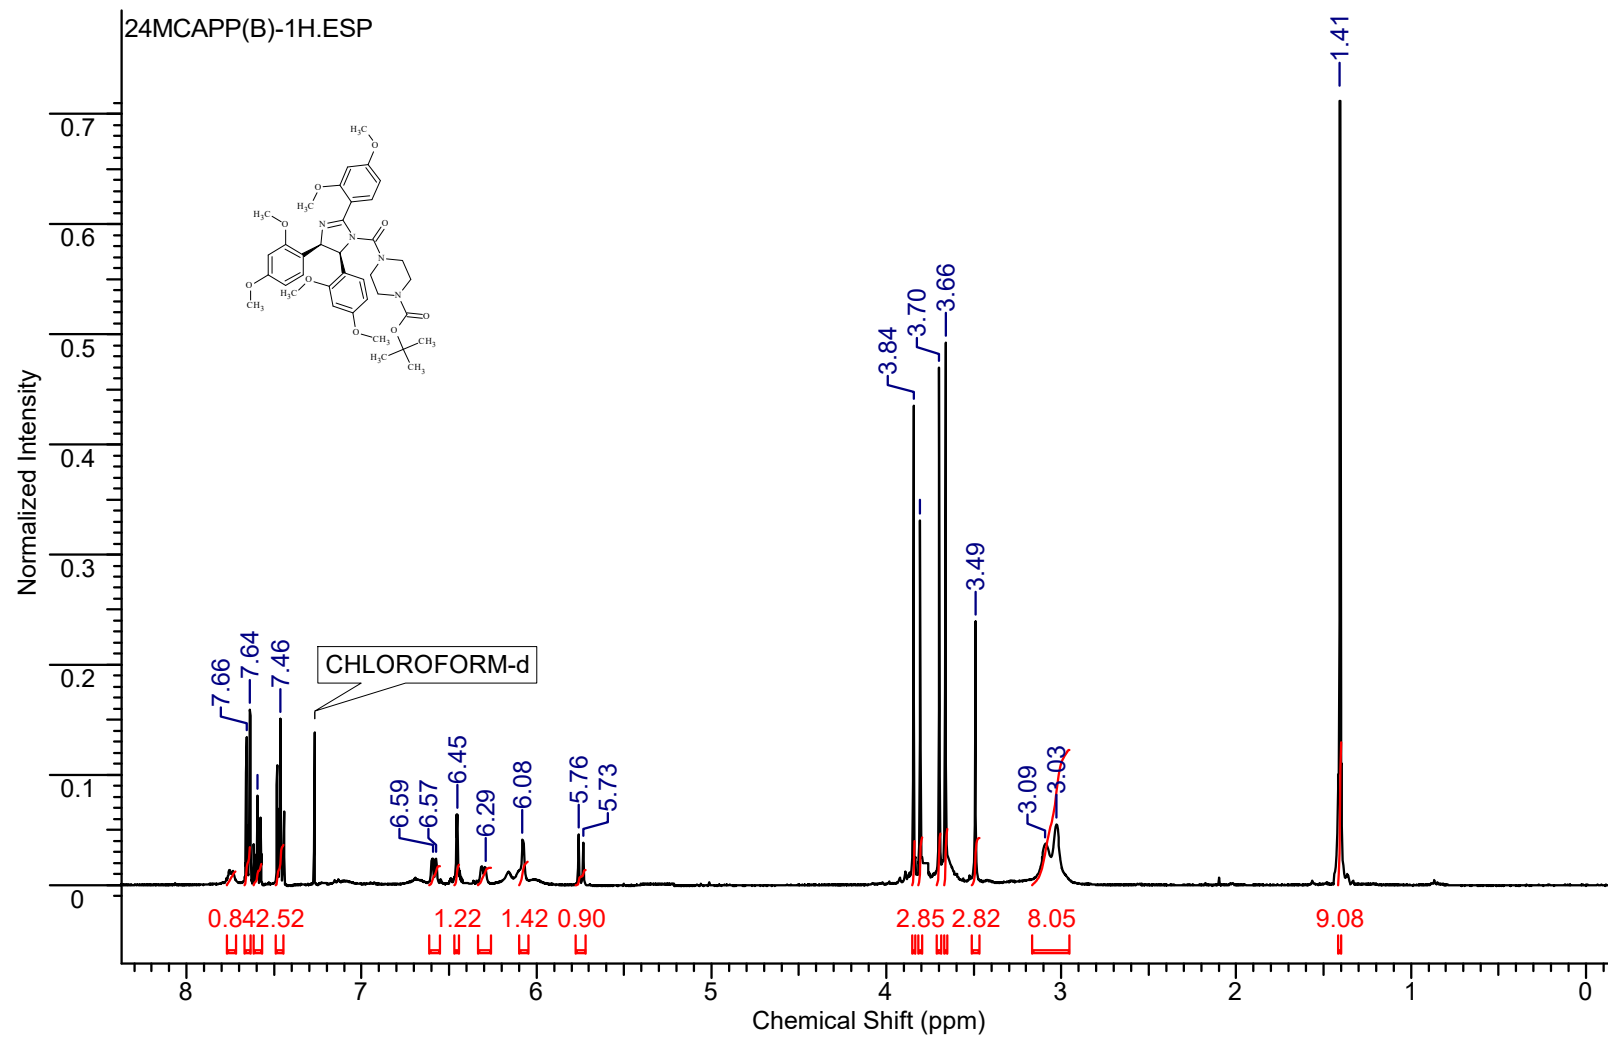

**<sup>13</sup>C NMR *tert*-Butyl 4-(*cis*-2,4,5-*tris*(2,4-dimethoxyphenyl)-4,5-dihydro-1*H*-imidazole-1-carbonyl)piperazine-1-carboxylate (2m).**

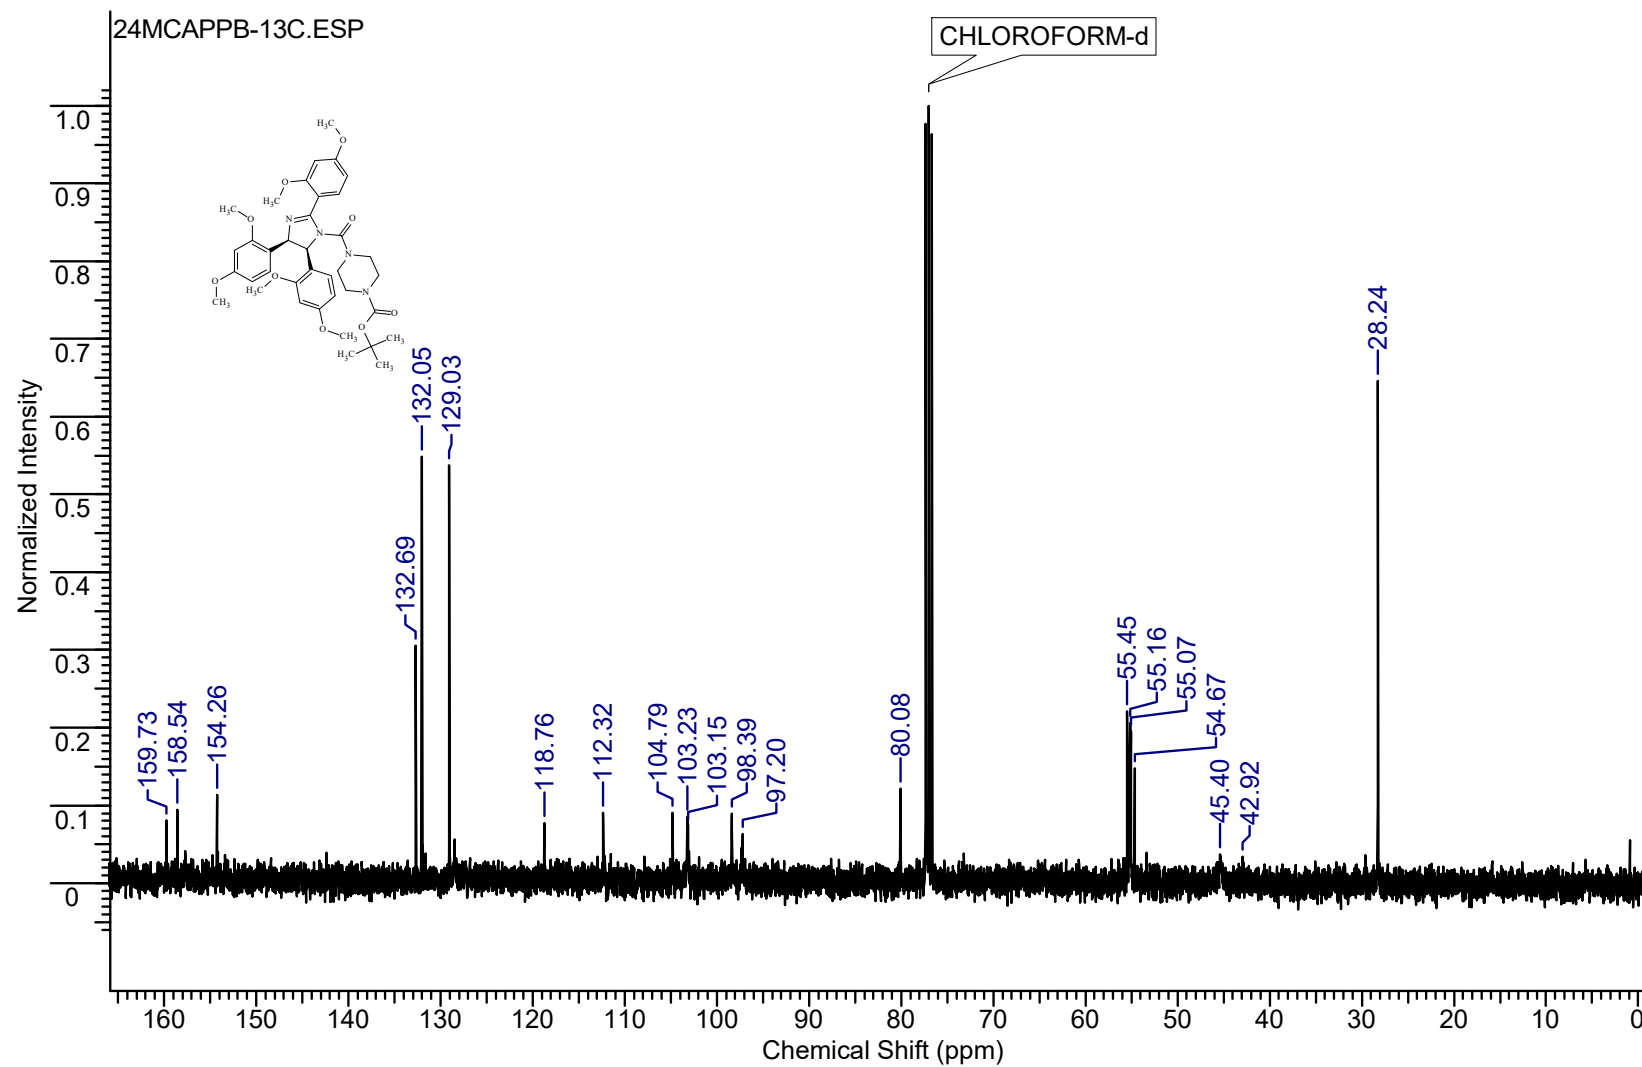

**<sup>1</sup>H NMR *Cis-N,N*-diethyl-2,4,5-*tris*(3,4-dimethoxyphenyl)-4,5-dihydro-1*H*-imidazole-1-carboxamide (2n).**

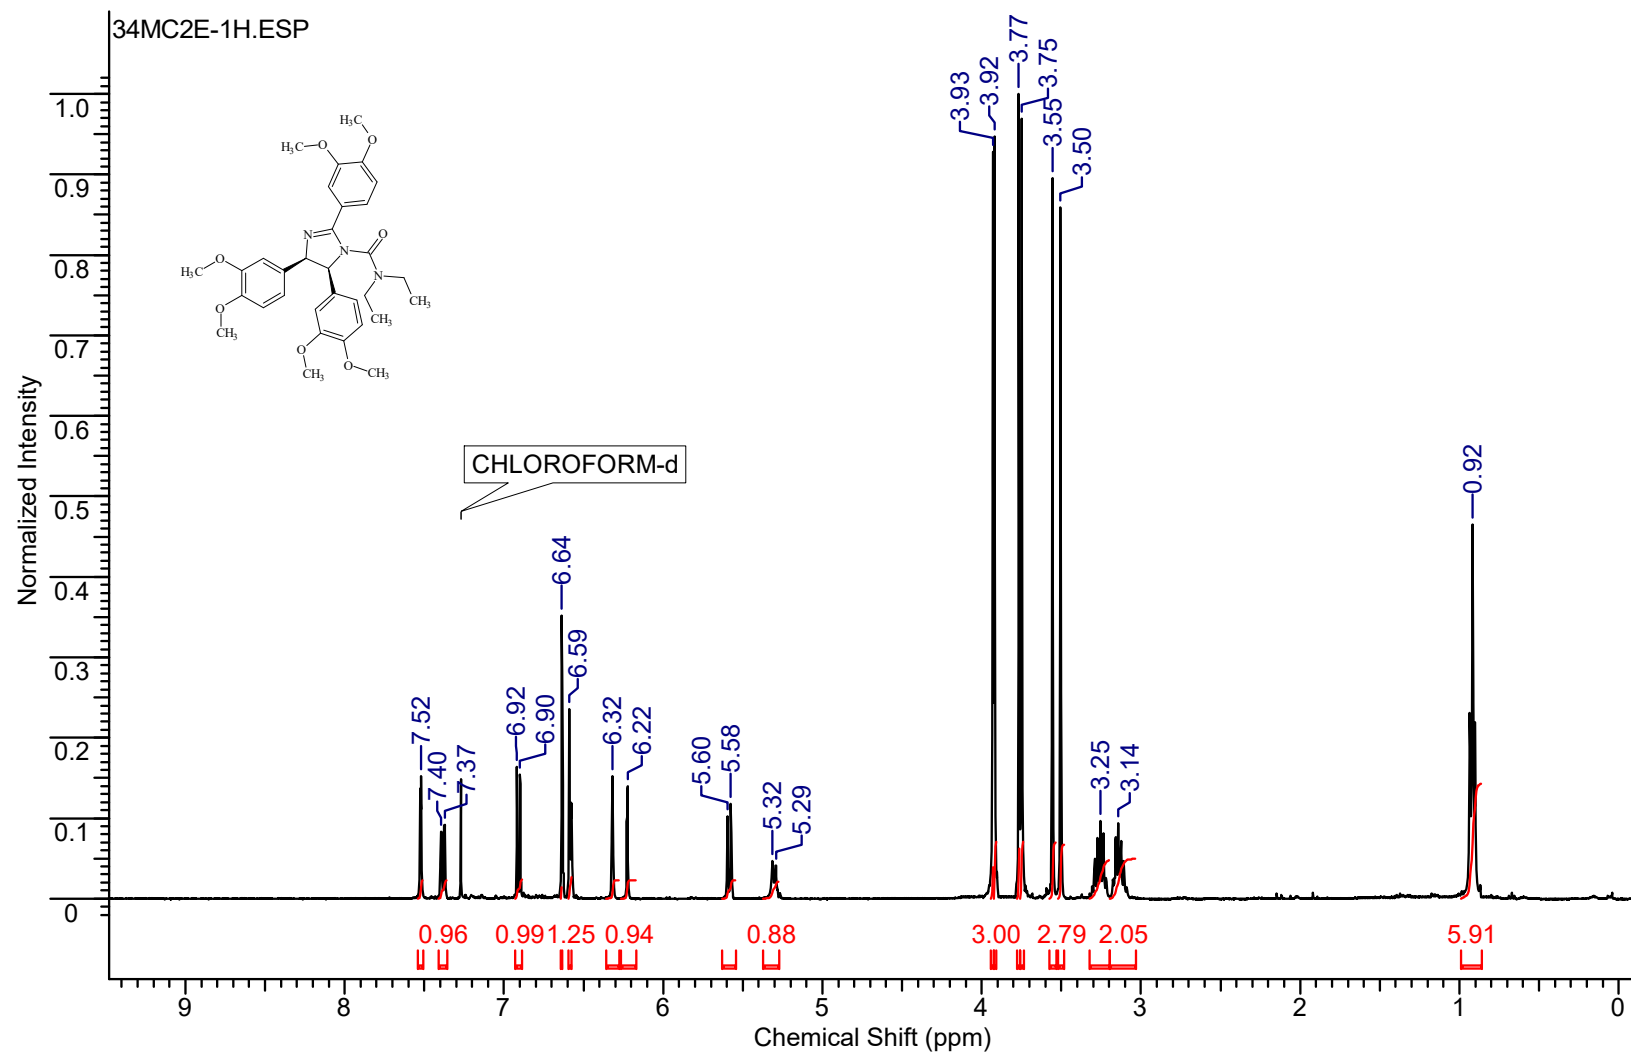

**<sup>13</sup>C NMR *Cis-N,N*-diethyl-2,4,5-*tris*(3,4-dimethoxyphenyl)-4,5-dihydro-1*H*-imidazole-1-carboxamide (2n).**

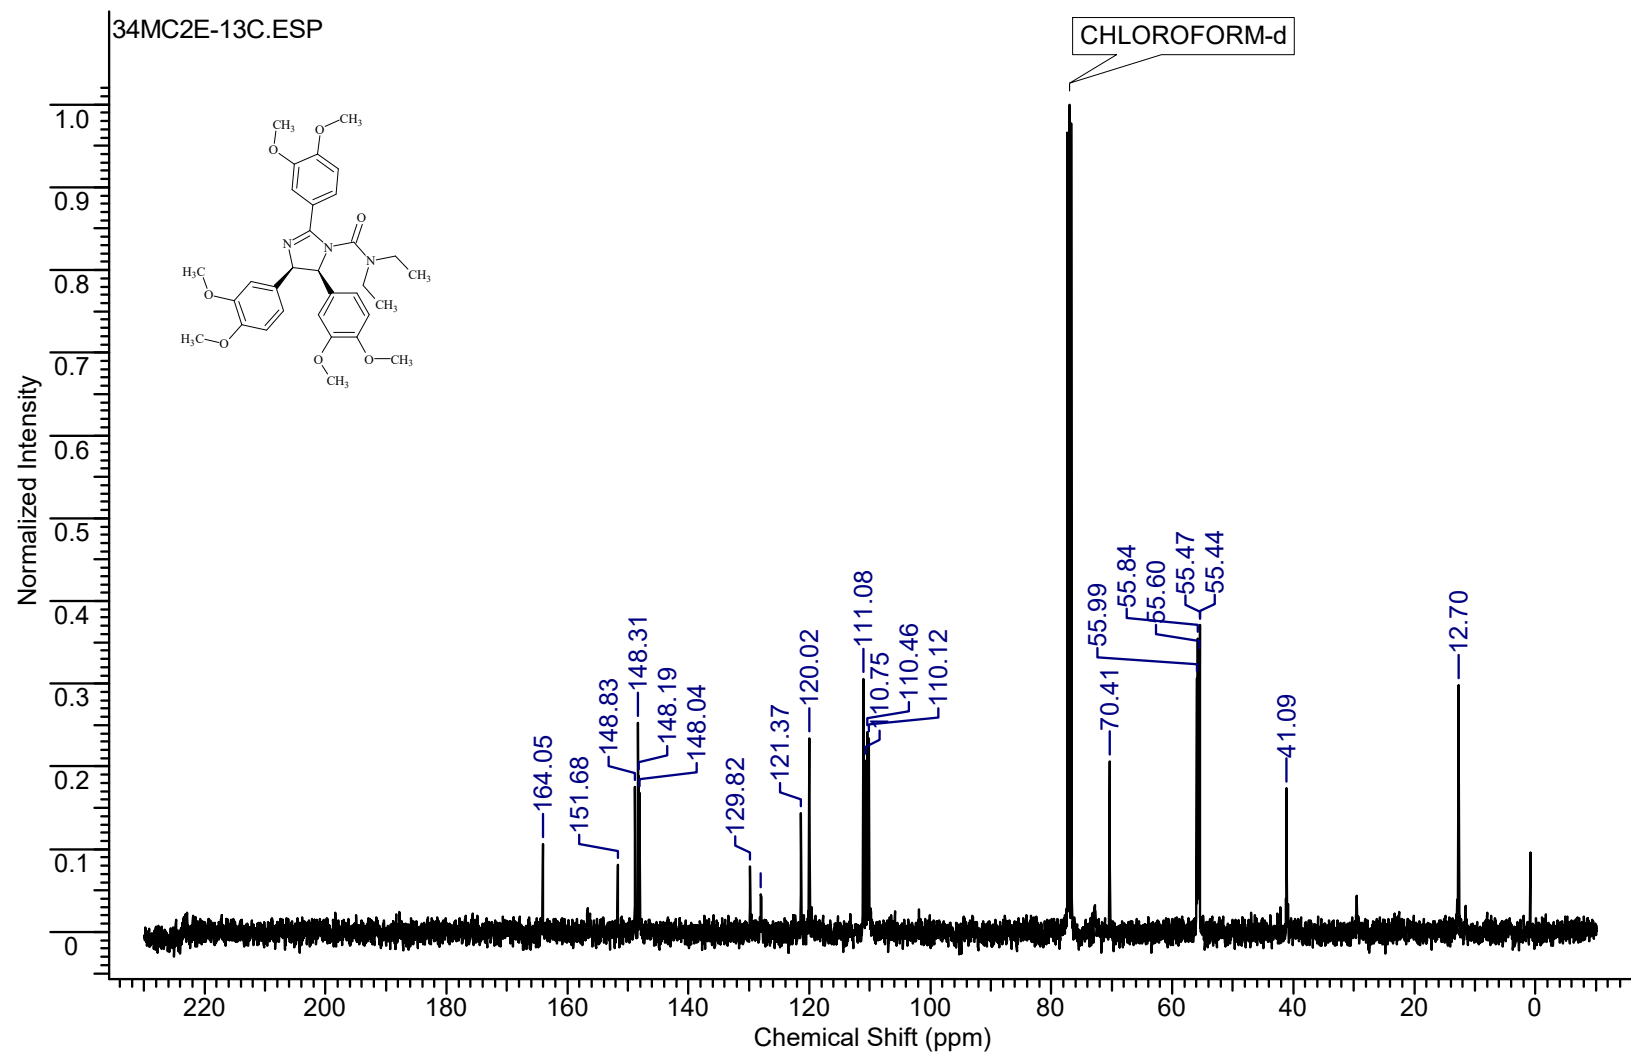

**<sup>1</sup>H NMR 4-[[*Cis*-2,4,5-*tris*(3,4-dimethoxyphenyl)-4,5-dihydro-1*H*-imidazol-1-yl]carbonyl]morpholine (2o).**

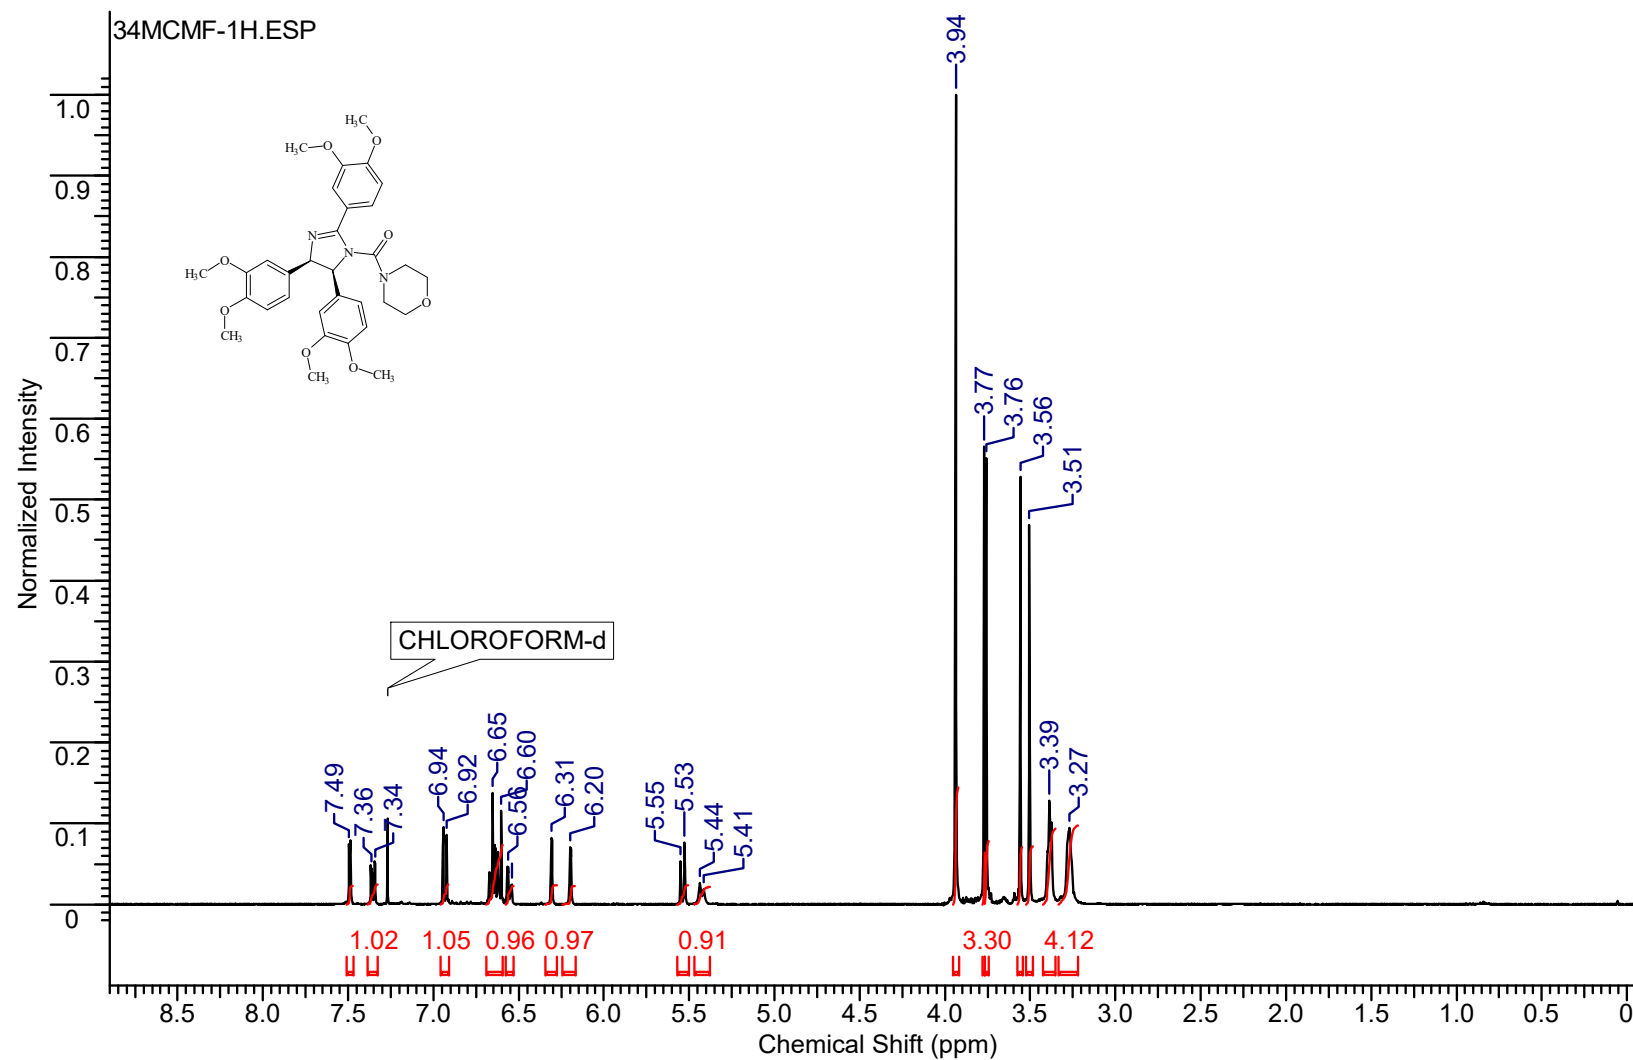

**<sup>13</sup>C NMR 4-[[*Cis*-2,4,5-*tris*(3,4-dimethoxyphenyl)-4,5-dihydro-1*H*-imidazol-1-yl]carbonyl]morpholine (2o).**

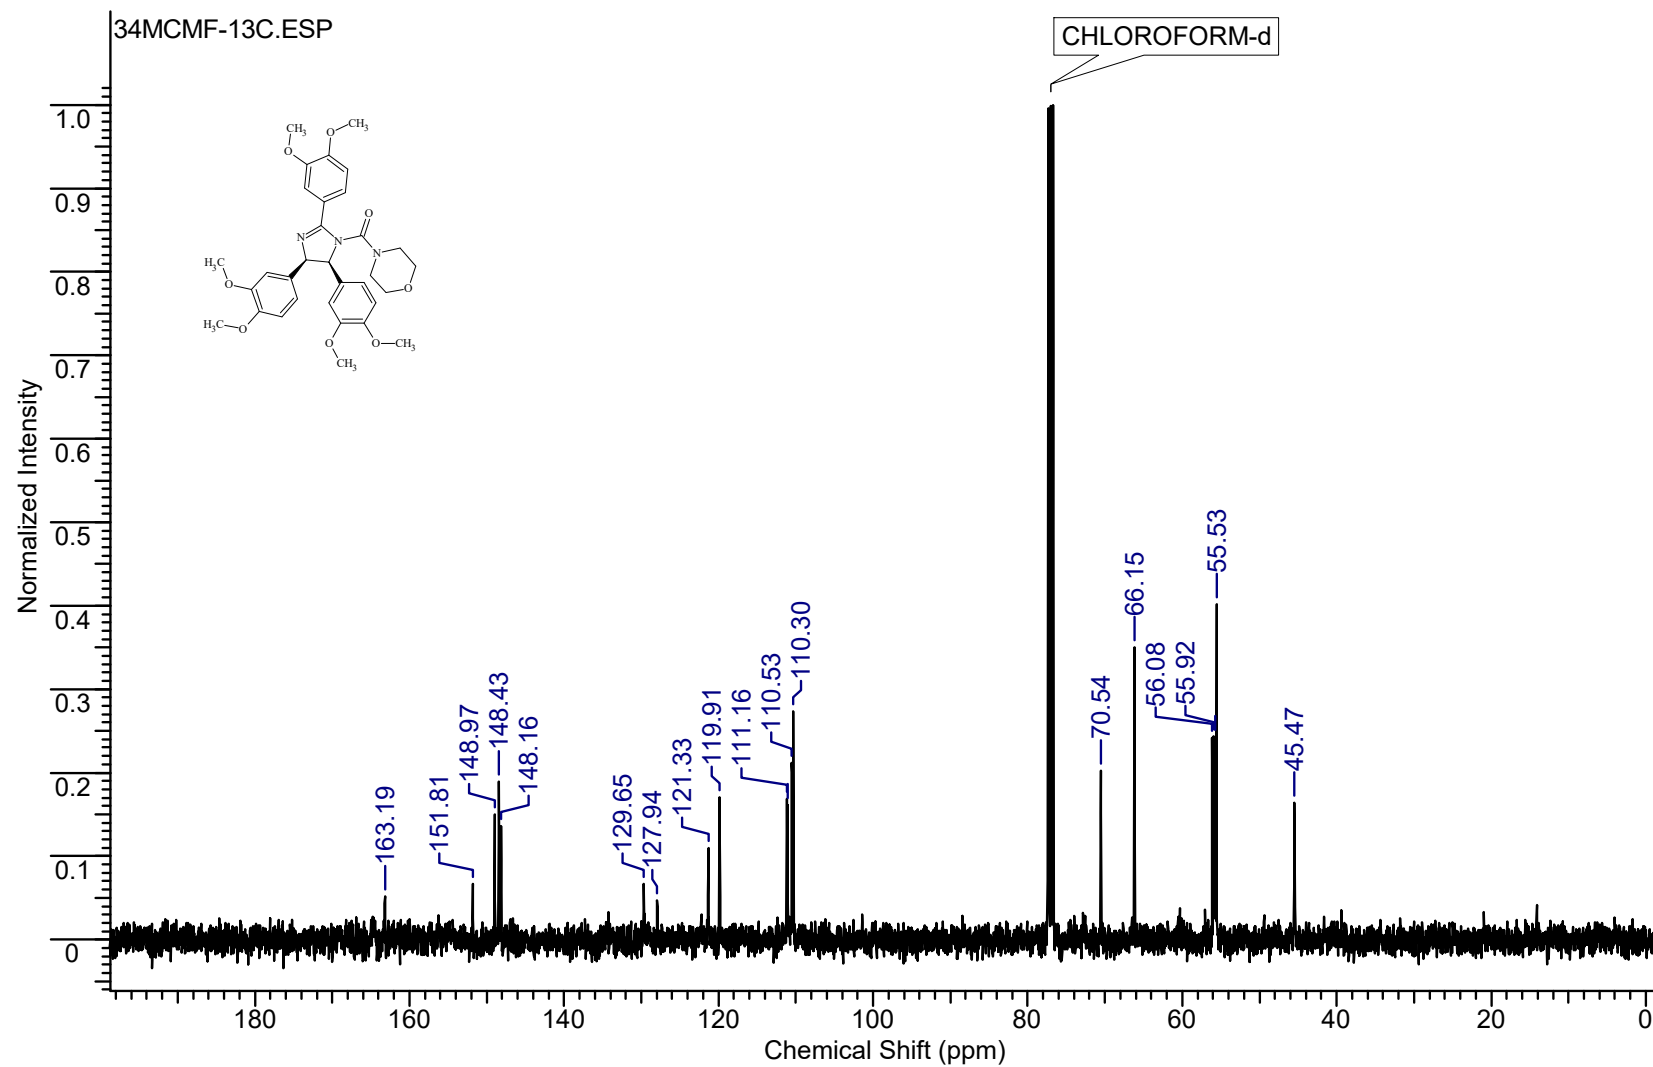

**<sup>1</sup>H NMR Piperidin-1-yl(*cis*-2,4,5-*tris*(3,4-dimethoxyphenyl)-4,5-dihydro-1*H*-imidazol-1-yl)methanone (2p).**

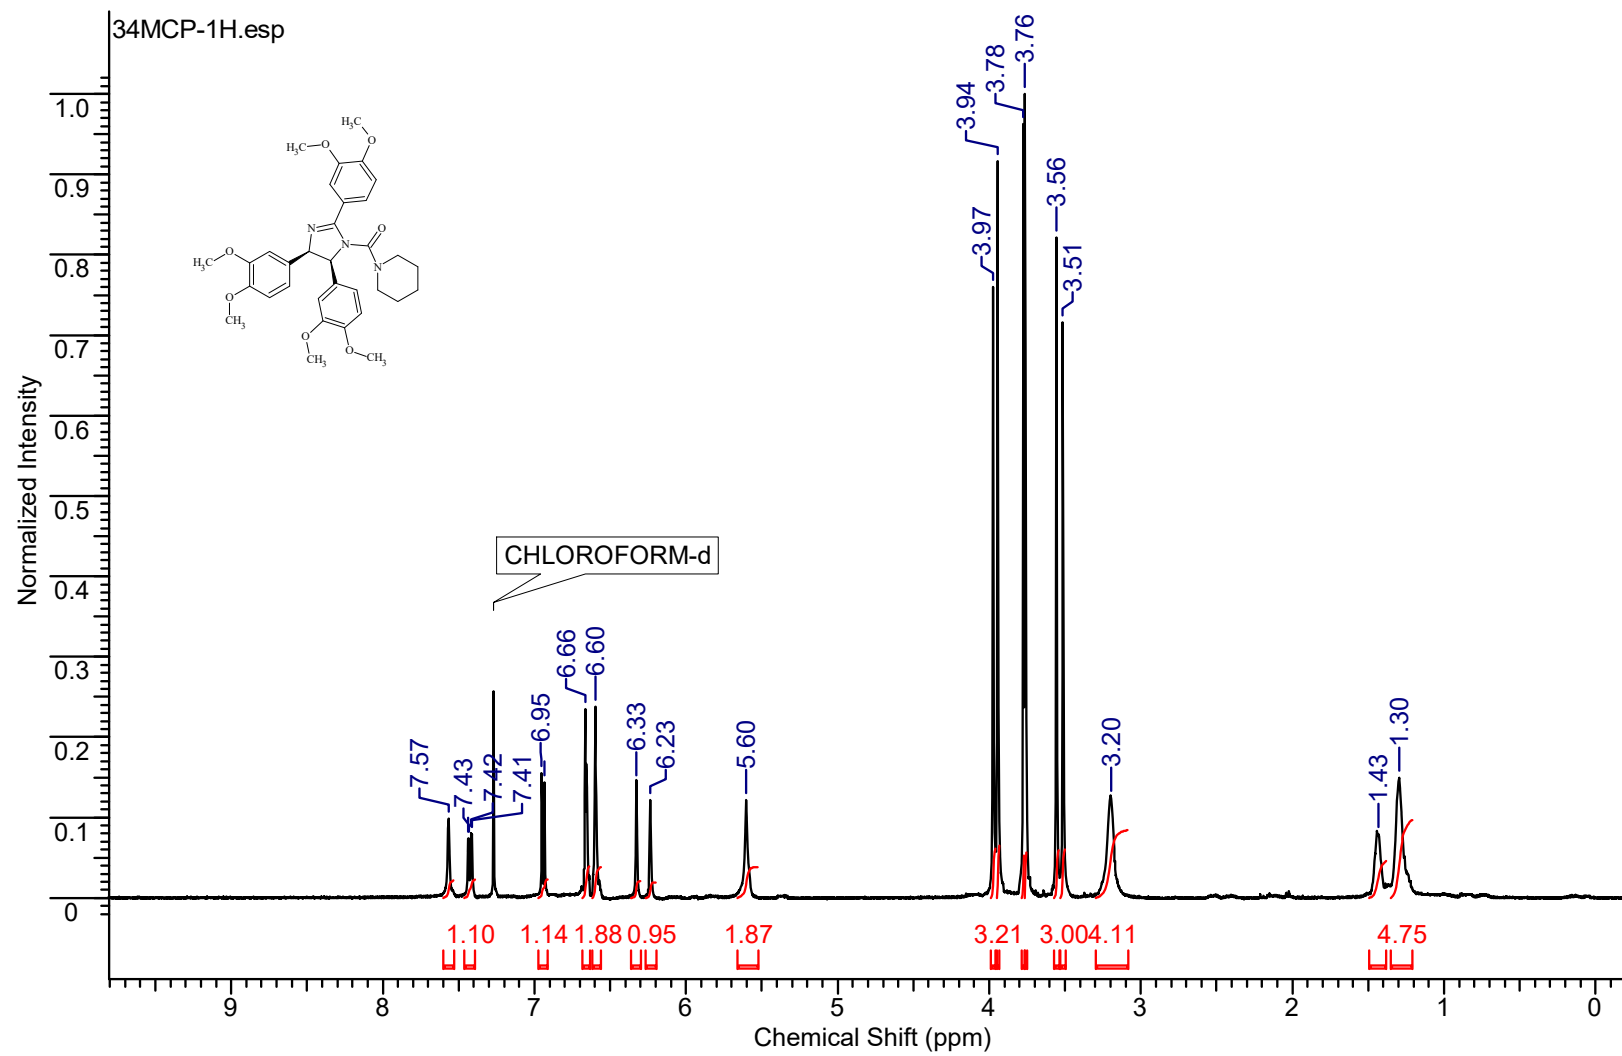

**<sup>13</sup>C NMR Piperidin-1-yl(*cis*-2,4,5-*tris*(3,4-dimethoxyphenyl)-4,5-dihydro-1*H*-imidazol-1-yl)methanone (2p).**

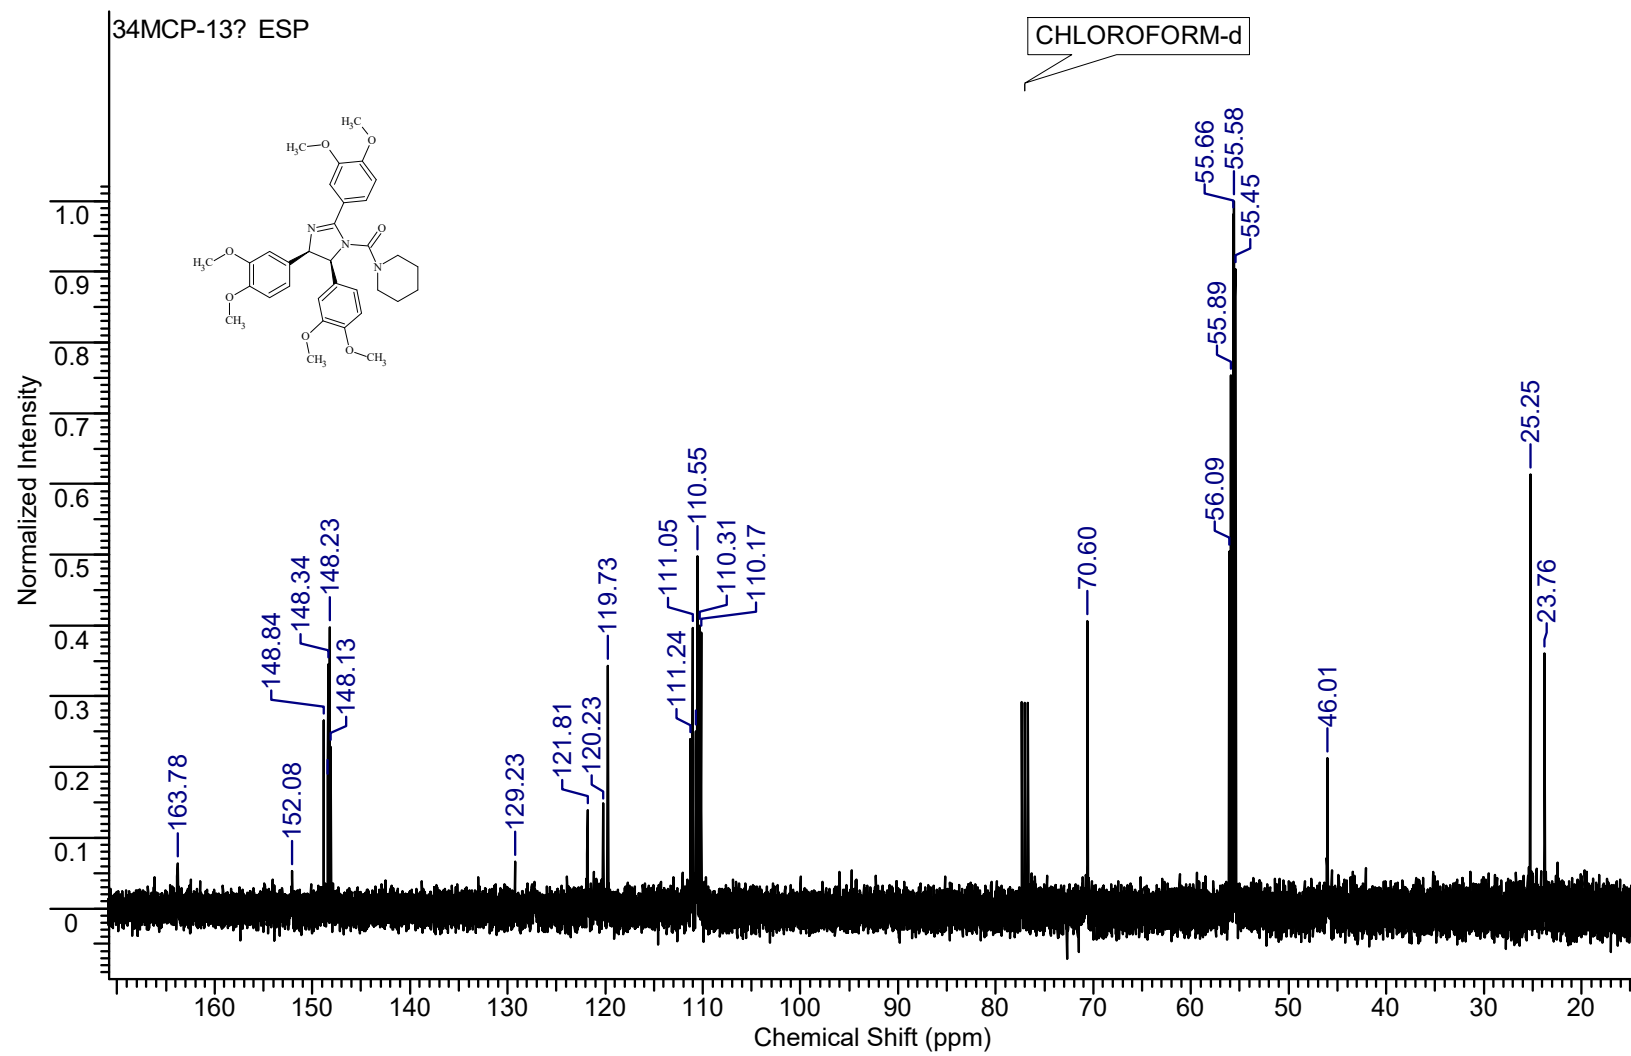

**<sup>1</sup>H NMR (4-Methylpiperidin-1-yl)(*cis*-2,4,5-*tris*(3,4-dimethoxyphenyl)-4,5-dihydro-1*H*-imidazol-1-yl)methanone (2q).**

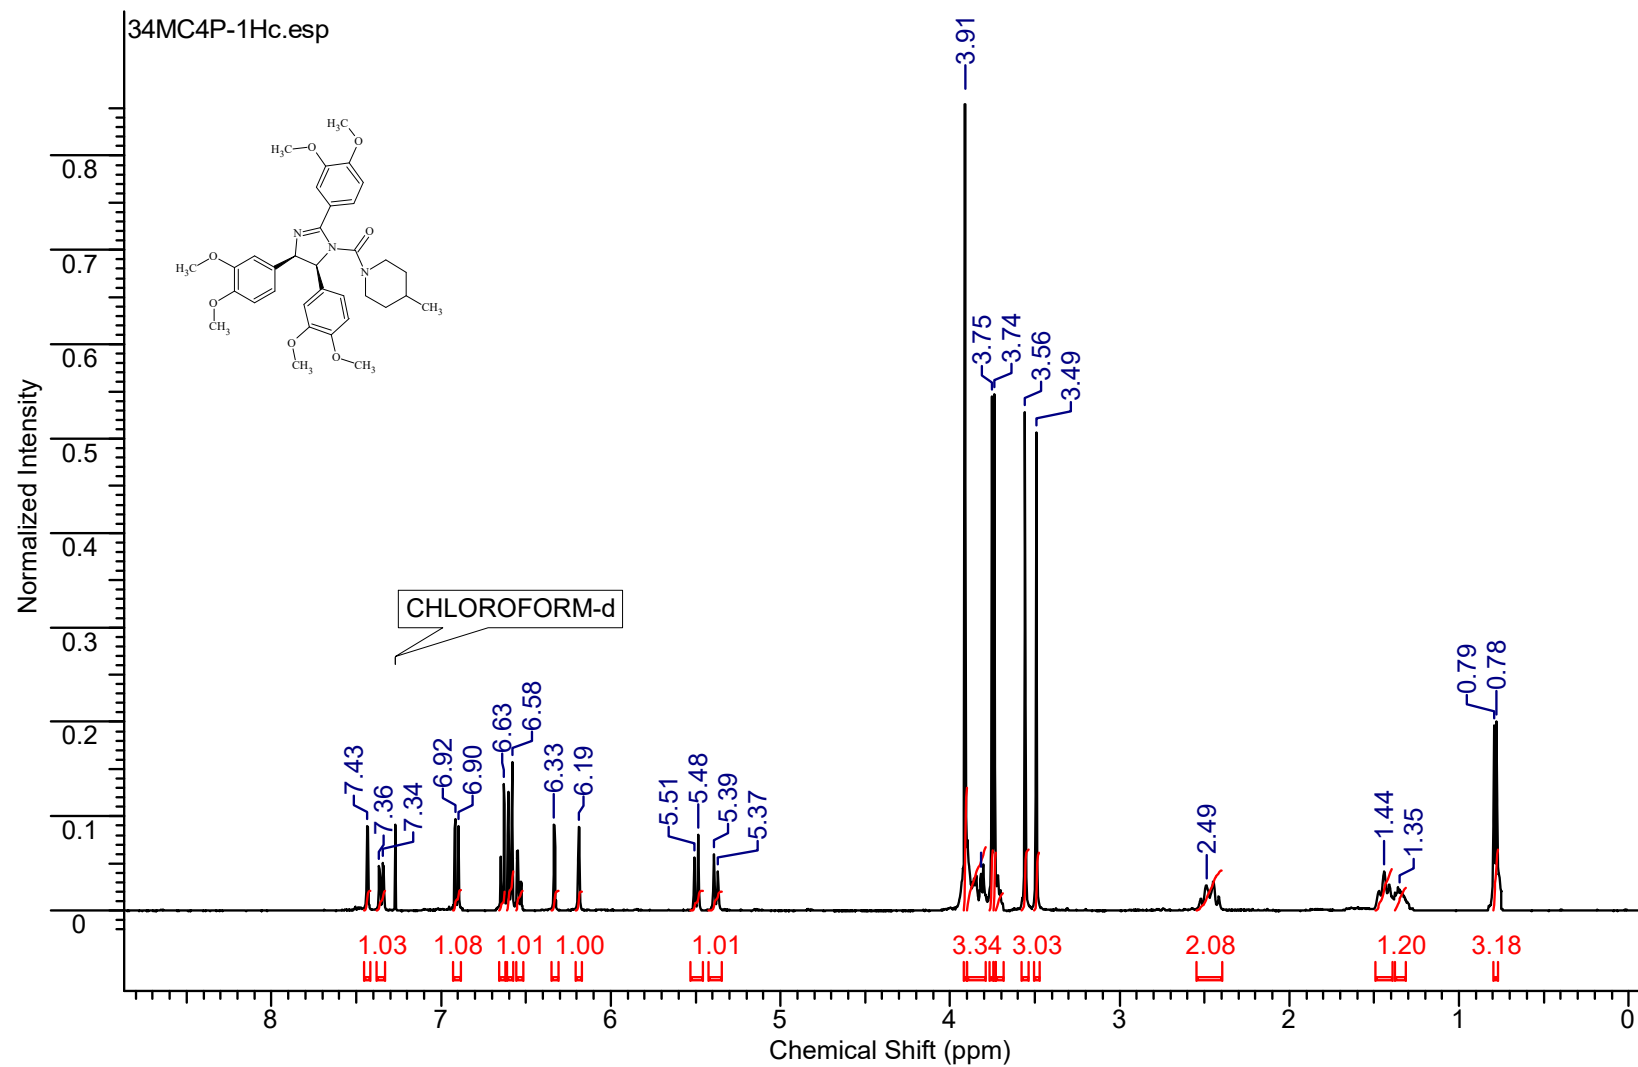

**<sup>13</sup>C NMR (4-Methylpiperidin-1-yl)(*cis*-2,4,5-*tris*(3,4-dimethoxyphenyl)-4,5-dihydro-1*H*-imidazol-1-yl)methanone (2q).**

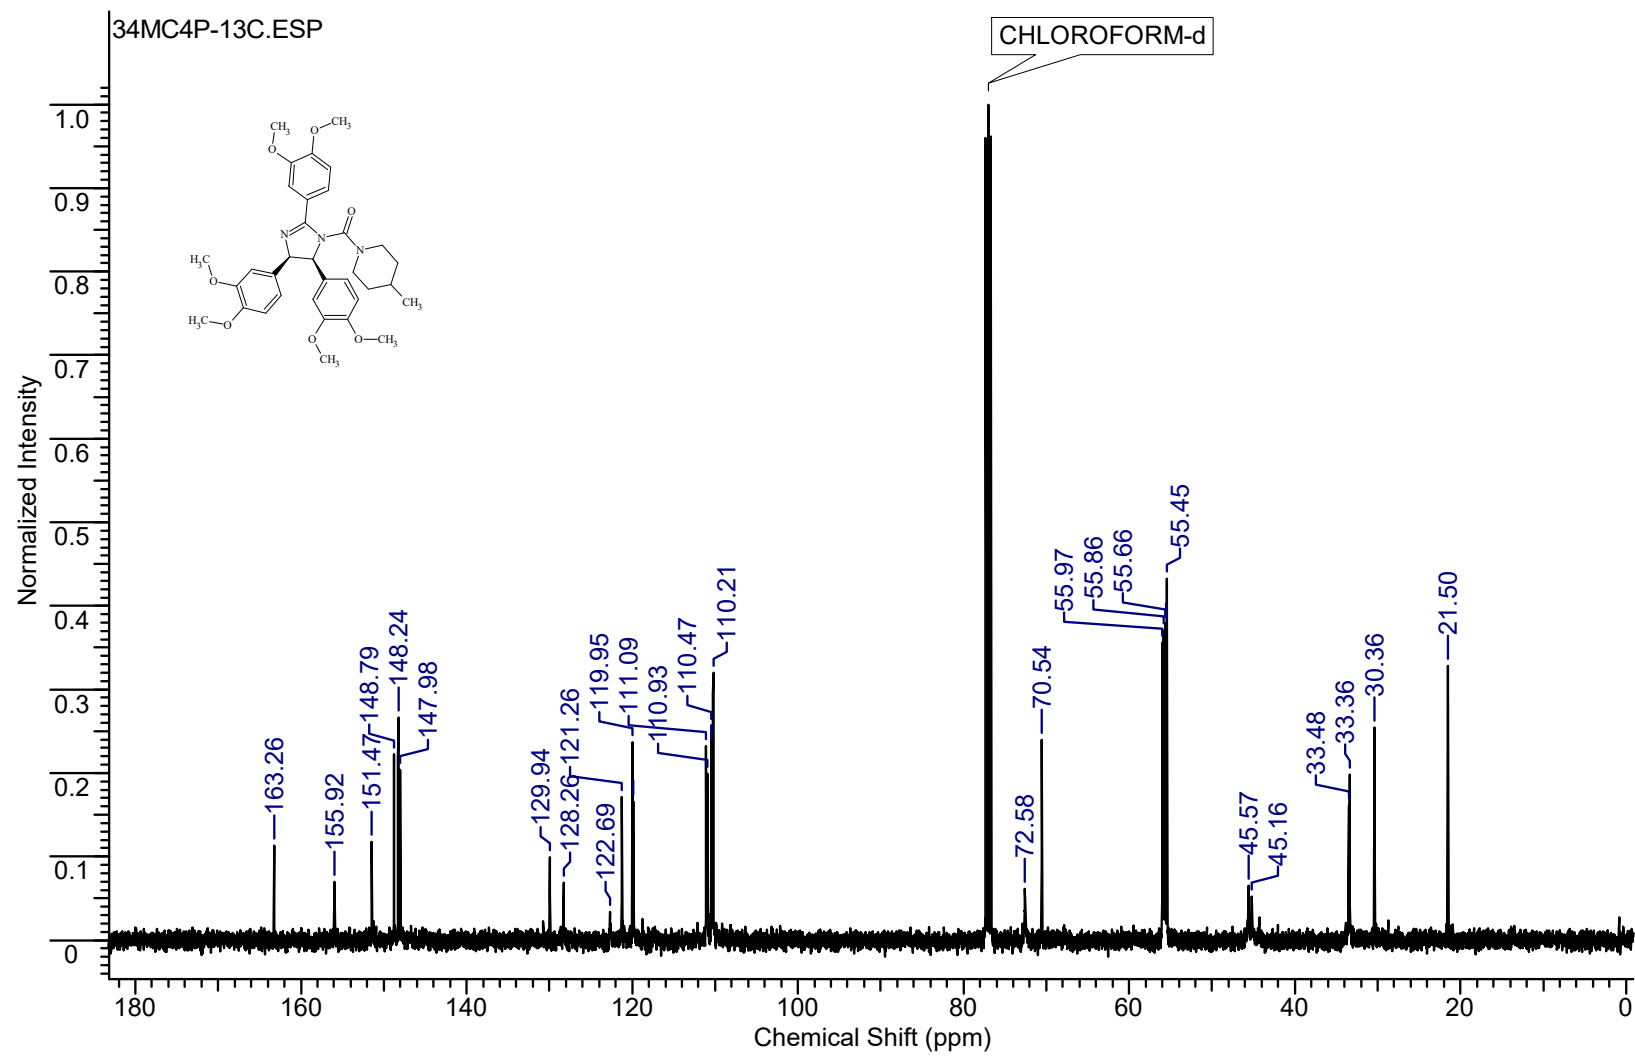

**<sup>1</sup>H NMR Pyrrolidin-1-yl(*cis*-2,4,5-*tris*(3,4-dimethoxyphenyl)-4,5-dihydro-1*H*-imidazol-1-yl)methanone (2r).**

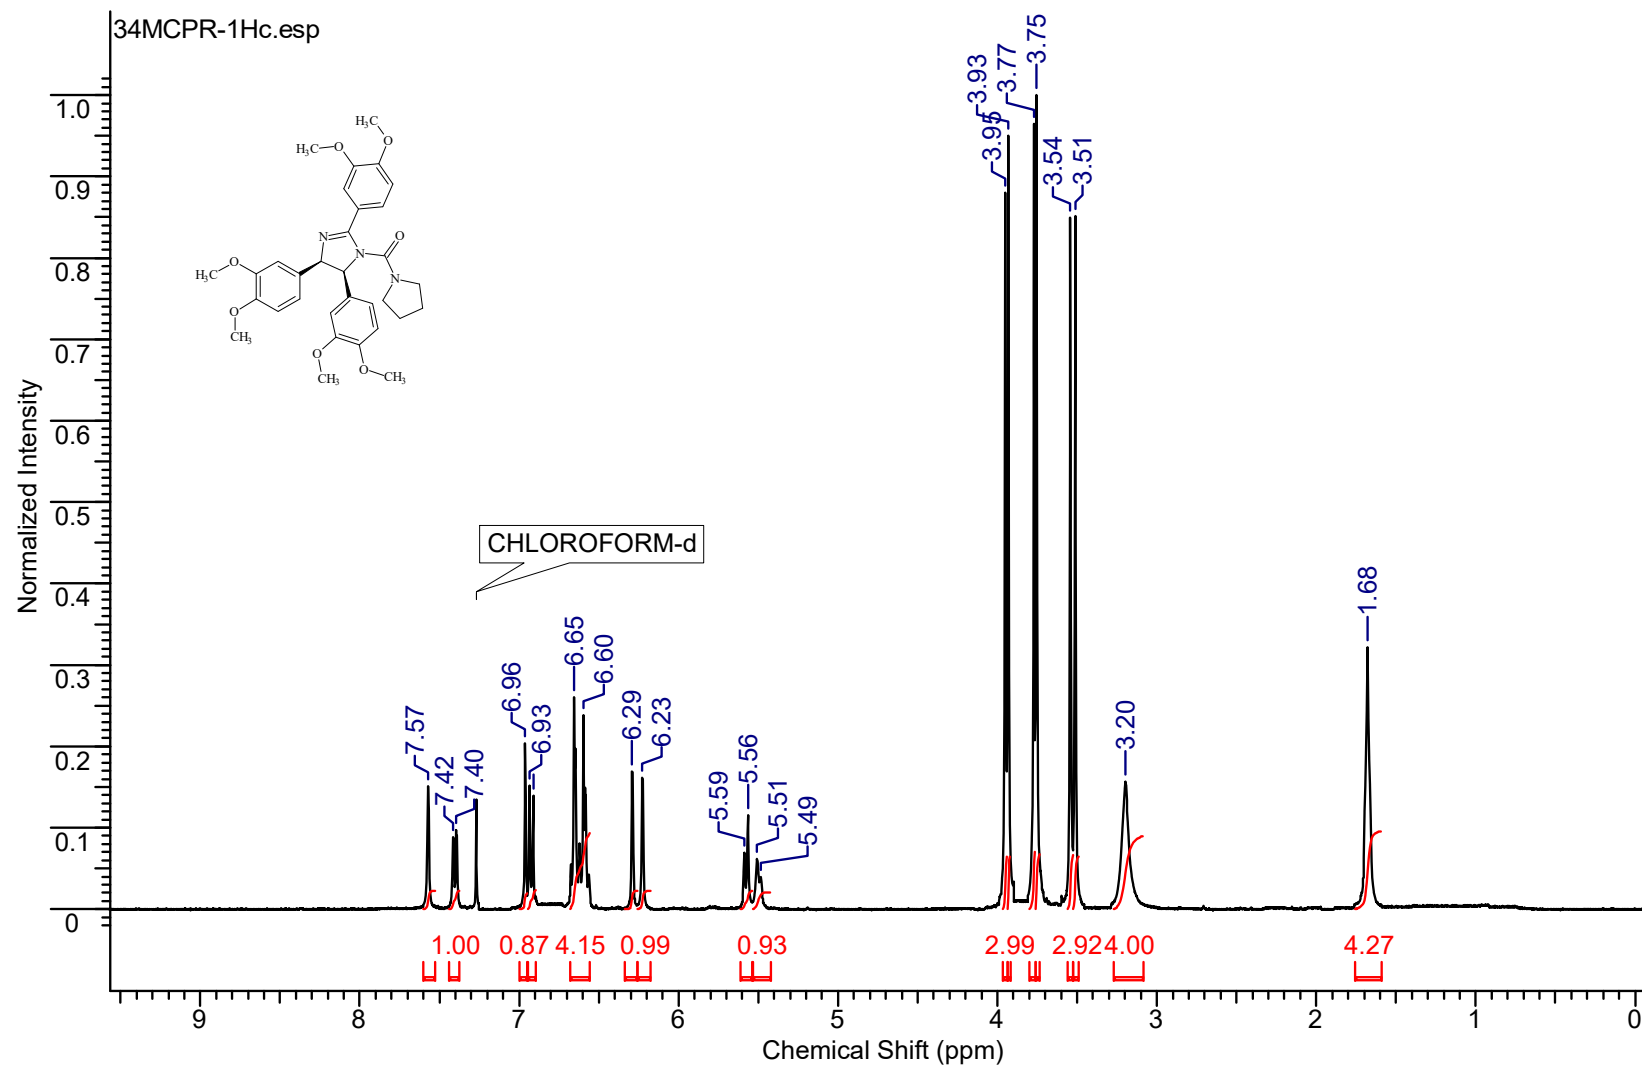

**<sup>13</sup>C NMR Pyrrolidin-1-yl(*cis*-2,4,5-*tris*(3,4-dimethoxyphenyl)-4,5-dihydro-1*H*-imidazol-1-yl)methanone (2r).**

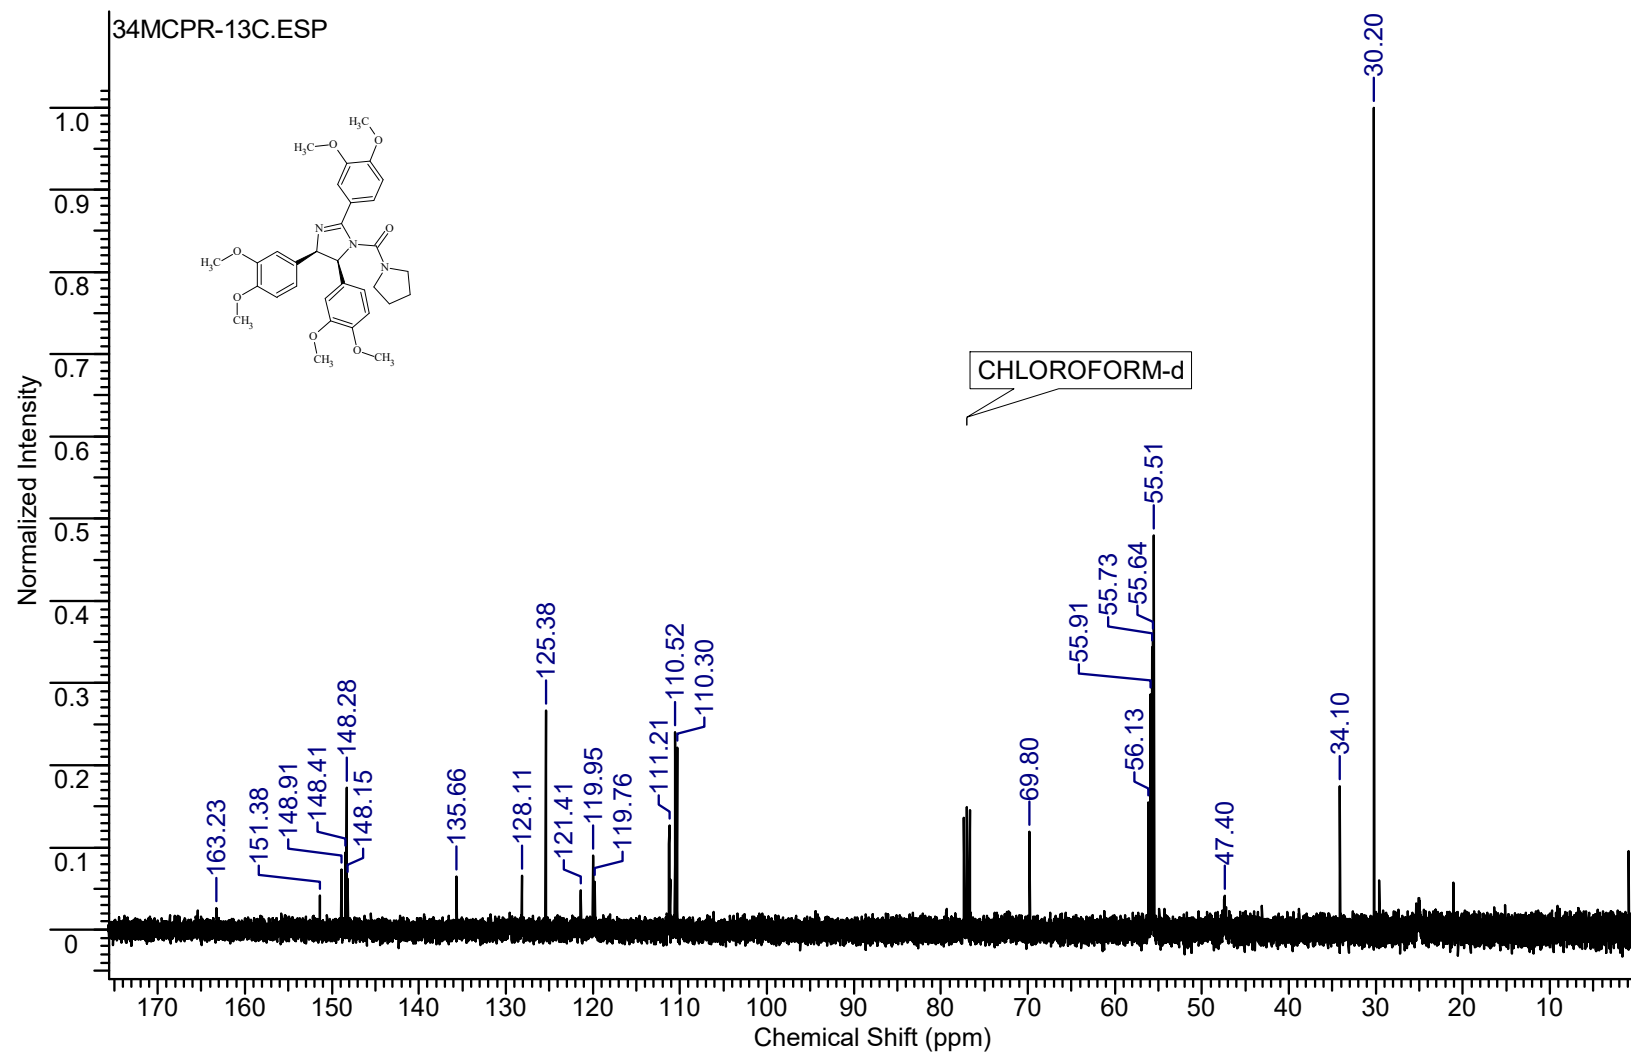

**<sup>1</sup>H NMR Azepan-1-yl(*cis*-2,4,5-*tris*(3,4-dimethoxyphenyl)-4,5-dihydro-1*H*-imidazol-1-yl)methanone (2s).**

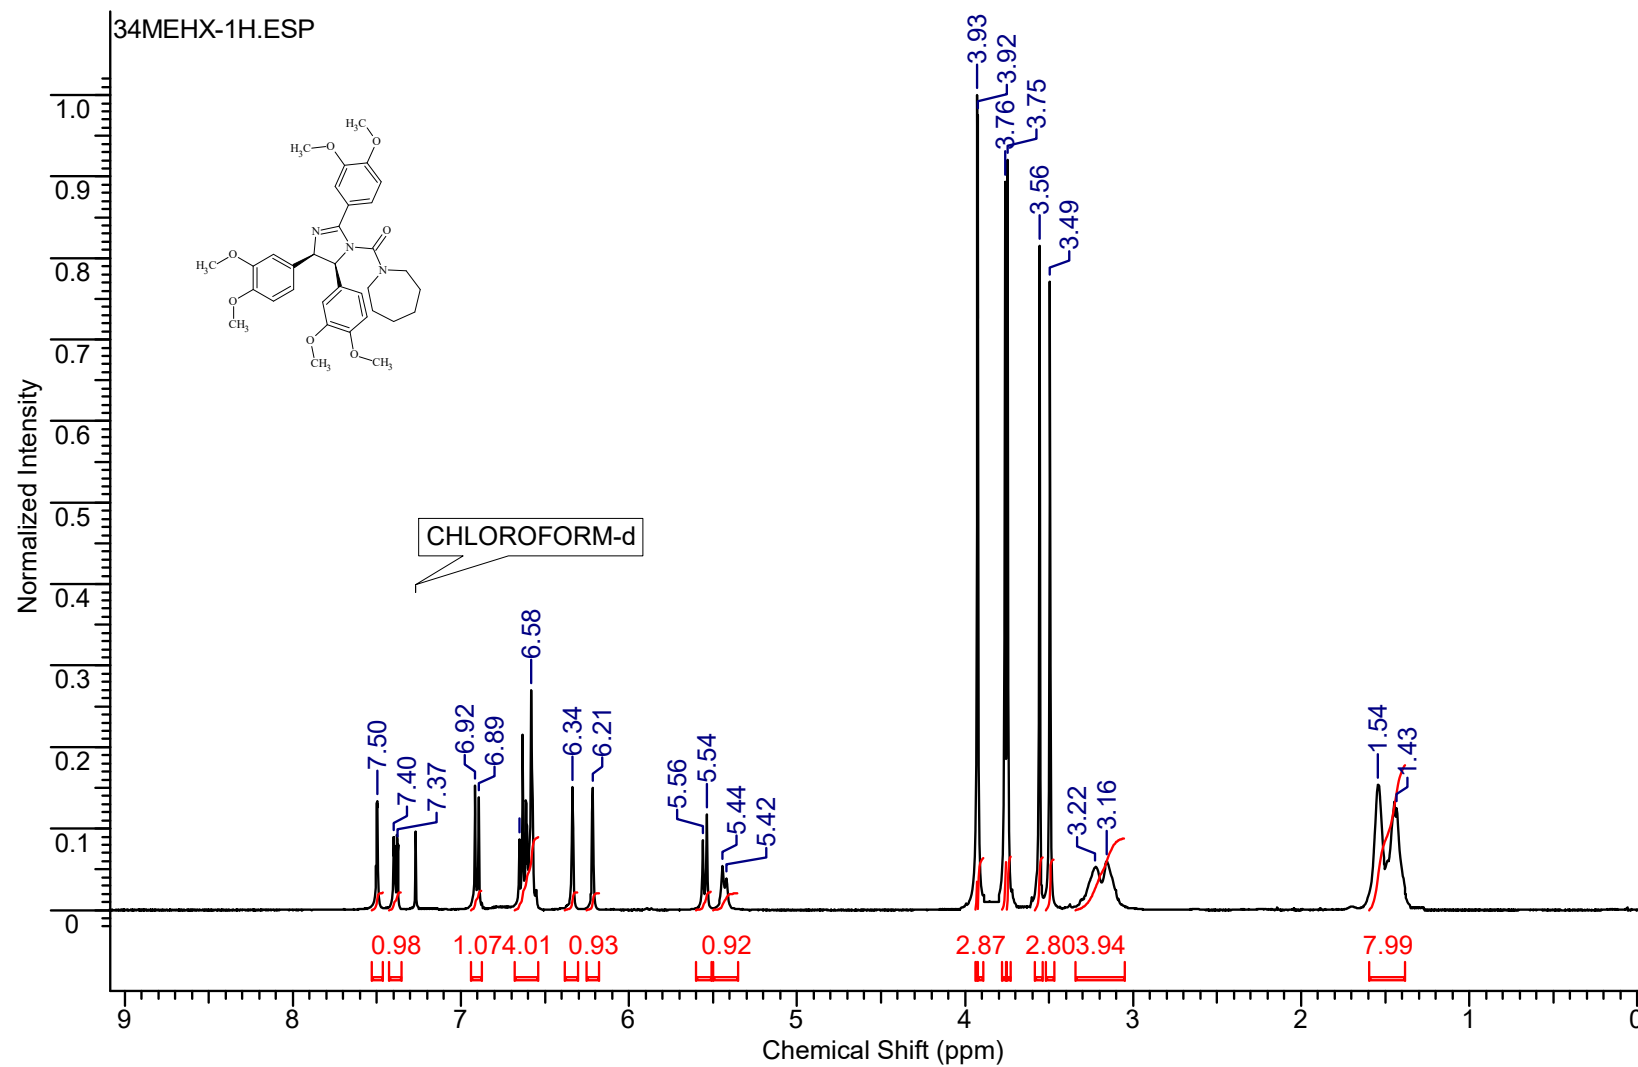

**<sup>13</sup>C NMR Azepan-1-yl(*cis*-2,4,5-*tris*(3,4-dimethoxyphenyl)-4,5-dihydro-1*H*-imidazol-1-yl)methanone (2s).**

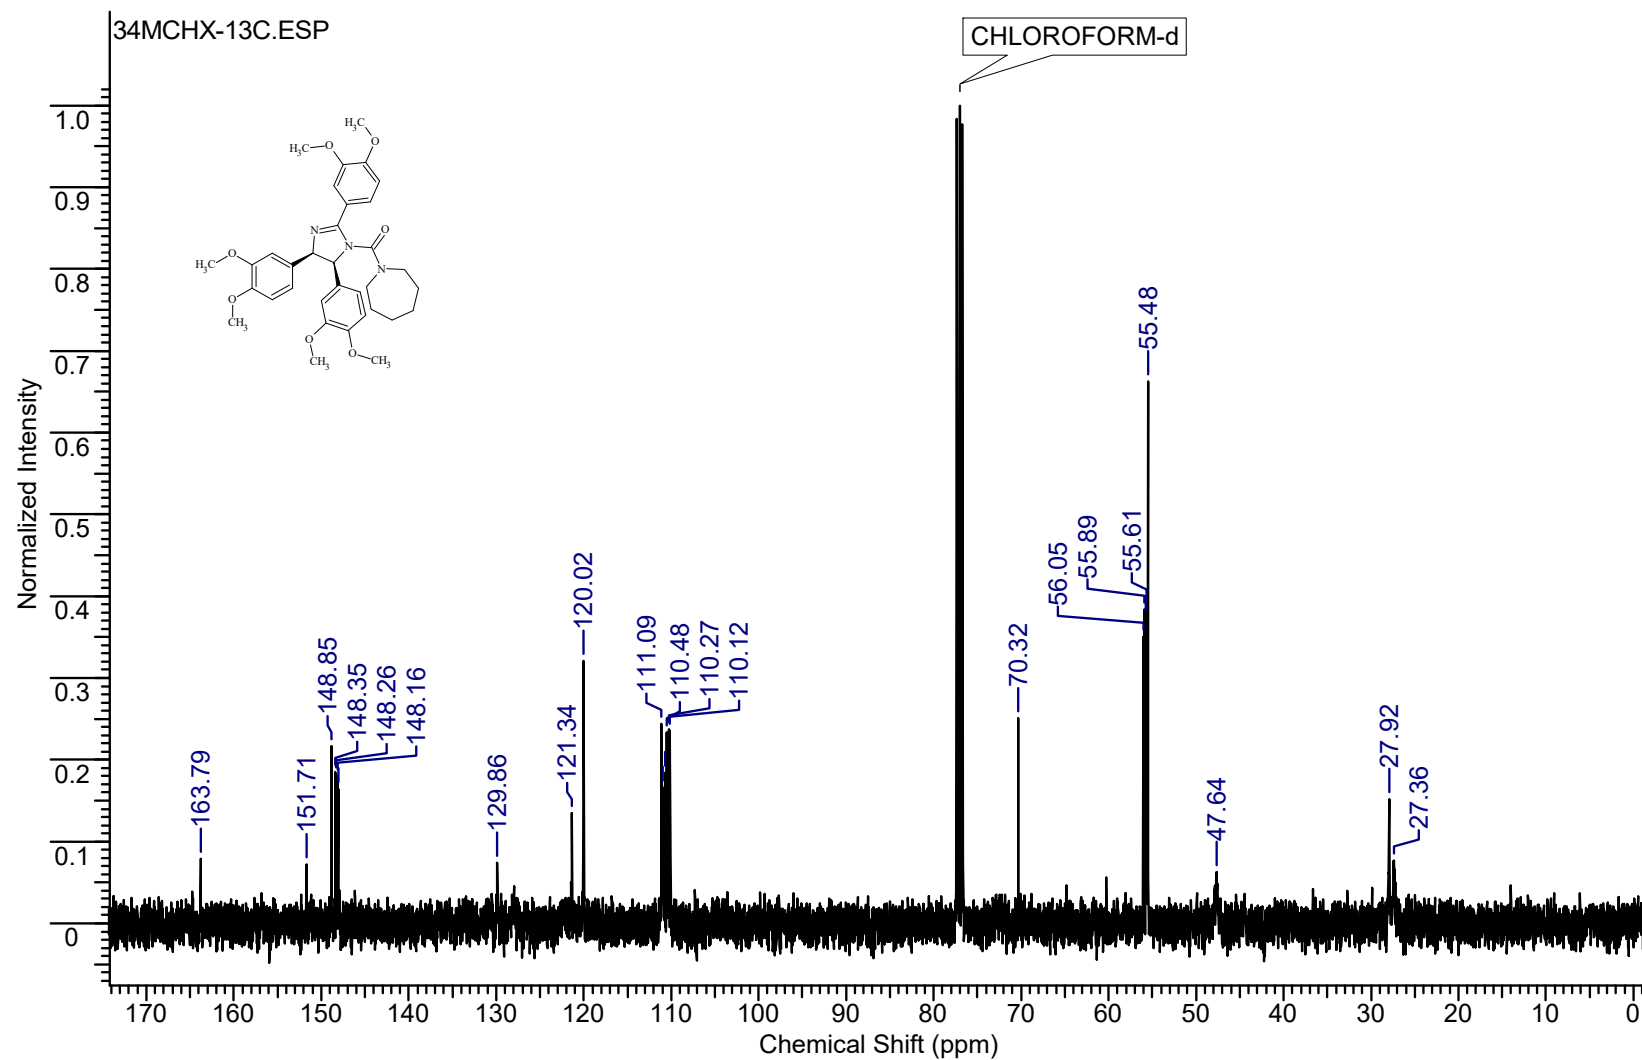

**<sup>1</sup>H NMR (4-Methylpiperazin-1-yl)(*cis*-2,4,5-*tris*(3,4-dimethoxyphenyl)-4,5-dihydro-1*H*-imidazol-1-yl)methanone (2t).**

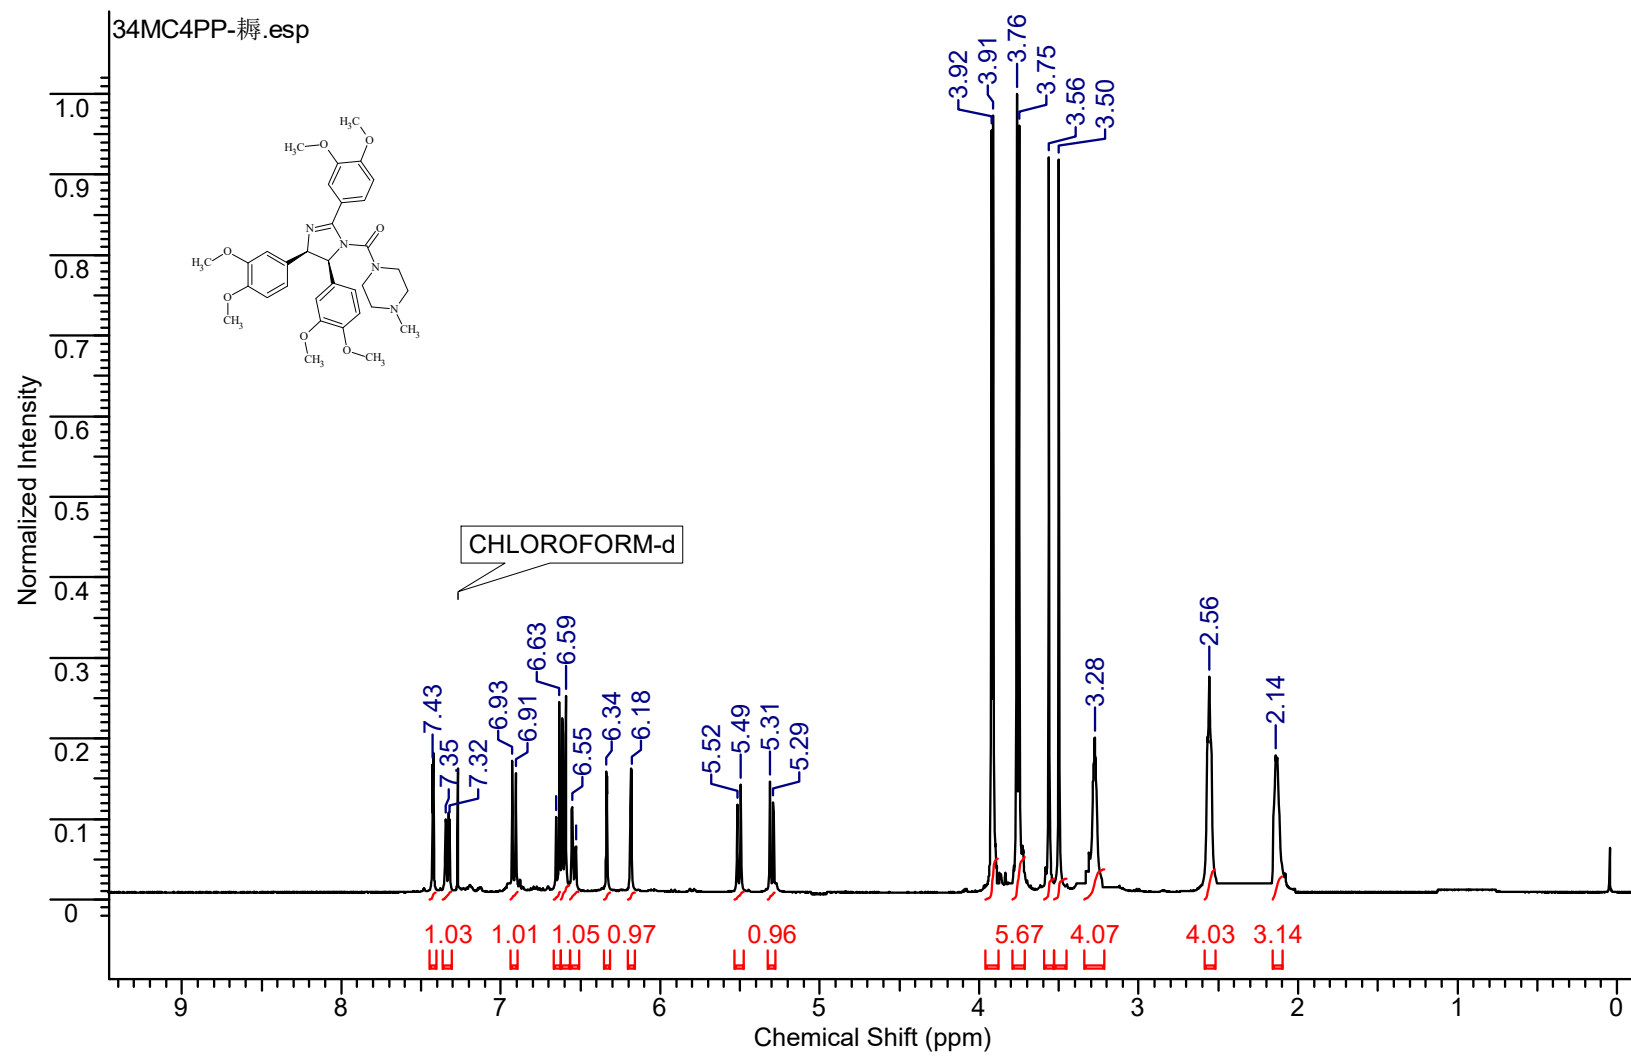

**<sup>13</sup>C NMR (4-Methylpiperazin-1-yl)(*cis*-2,4,5-*tris*(3,4-dimethoxyphenyl)-4,5-dihydro-1*H*-imidazol-1-yl)methanone (2t).**

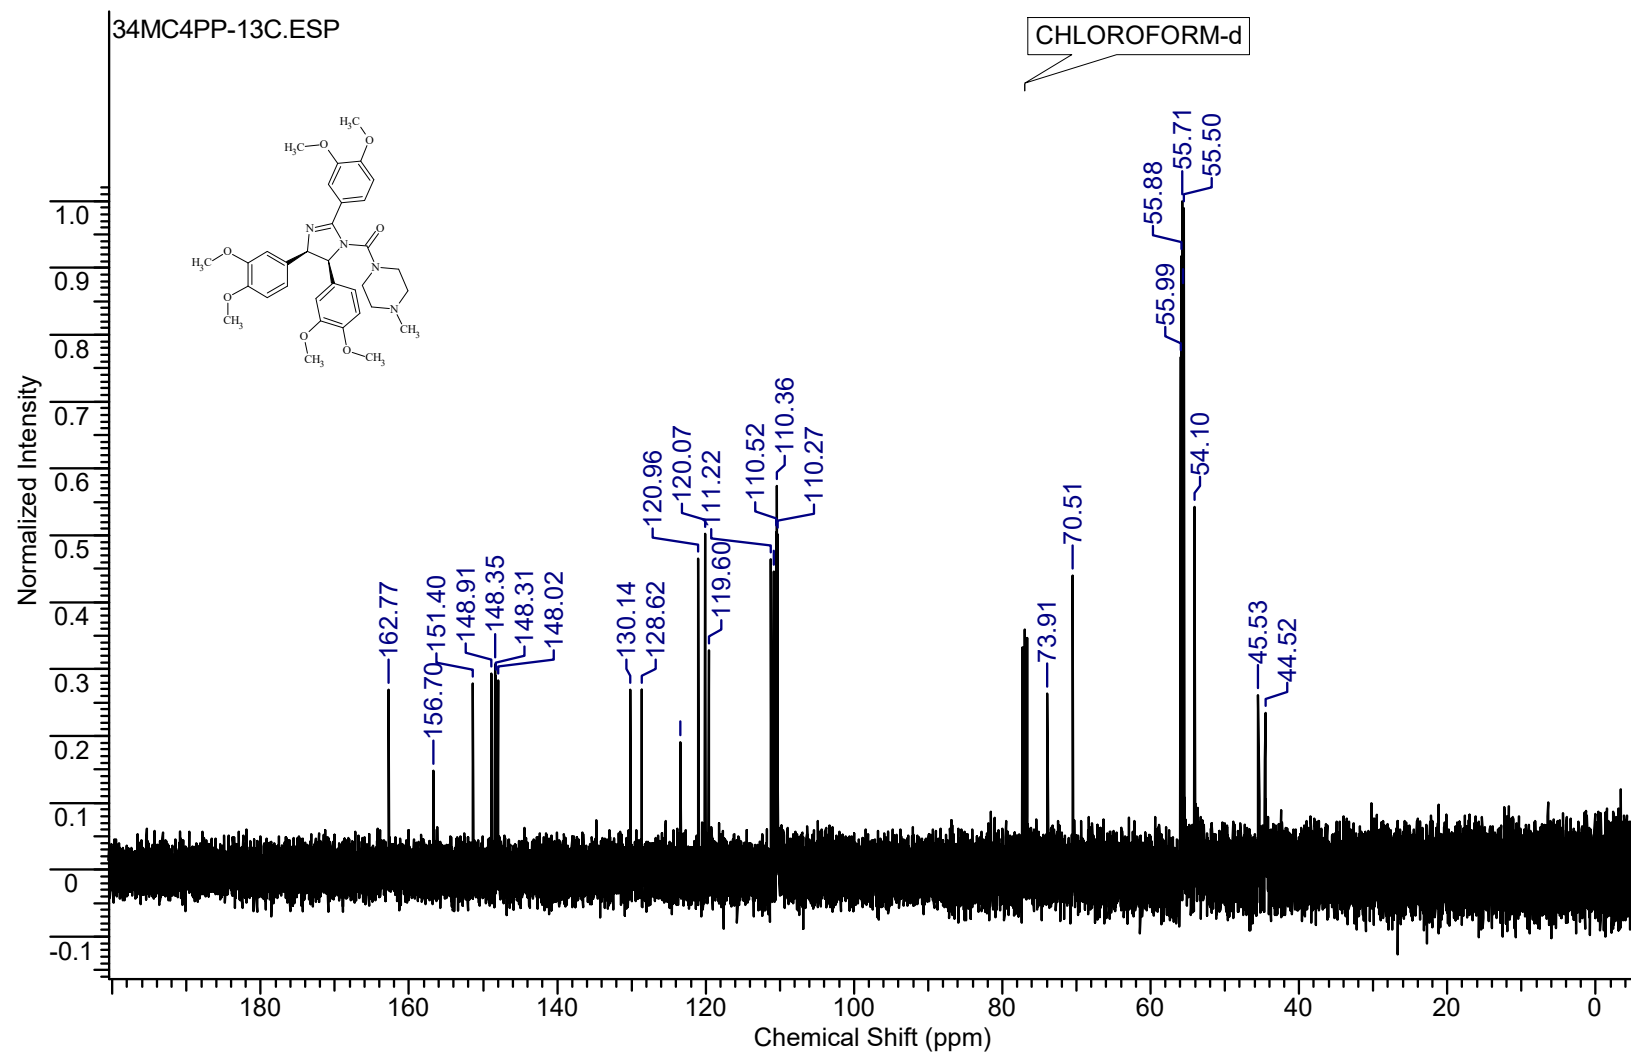

***1H* NMR *Cis-N,N*-diethyl-2,4,5-*tris*(3,5-dimethoxyphenyl)-4,5-dihydro-1*H*-imidazole-1-carboxamide (2u).**

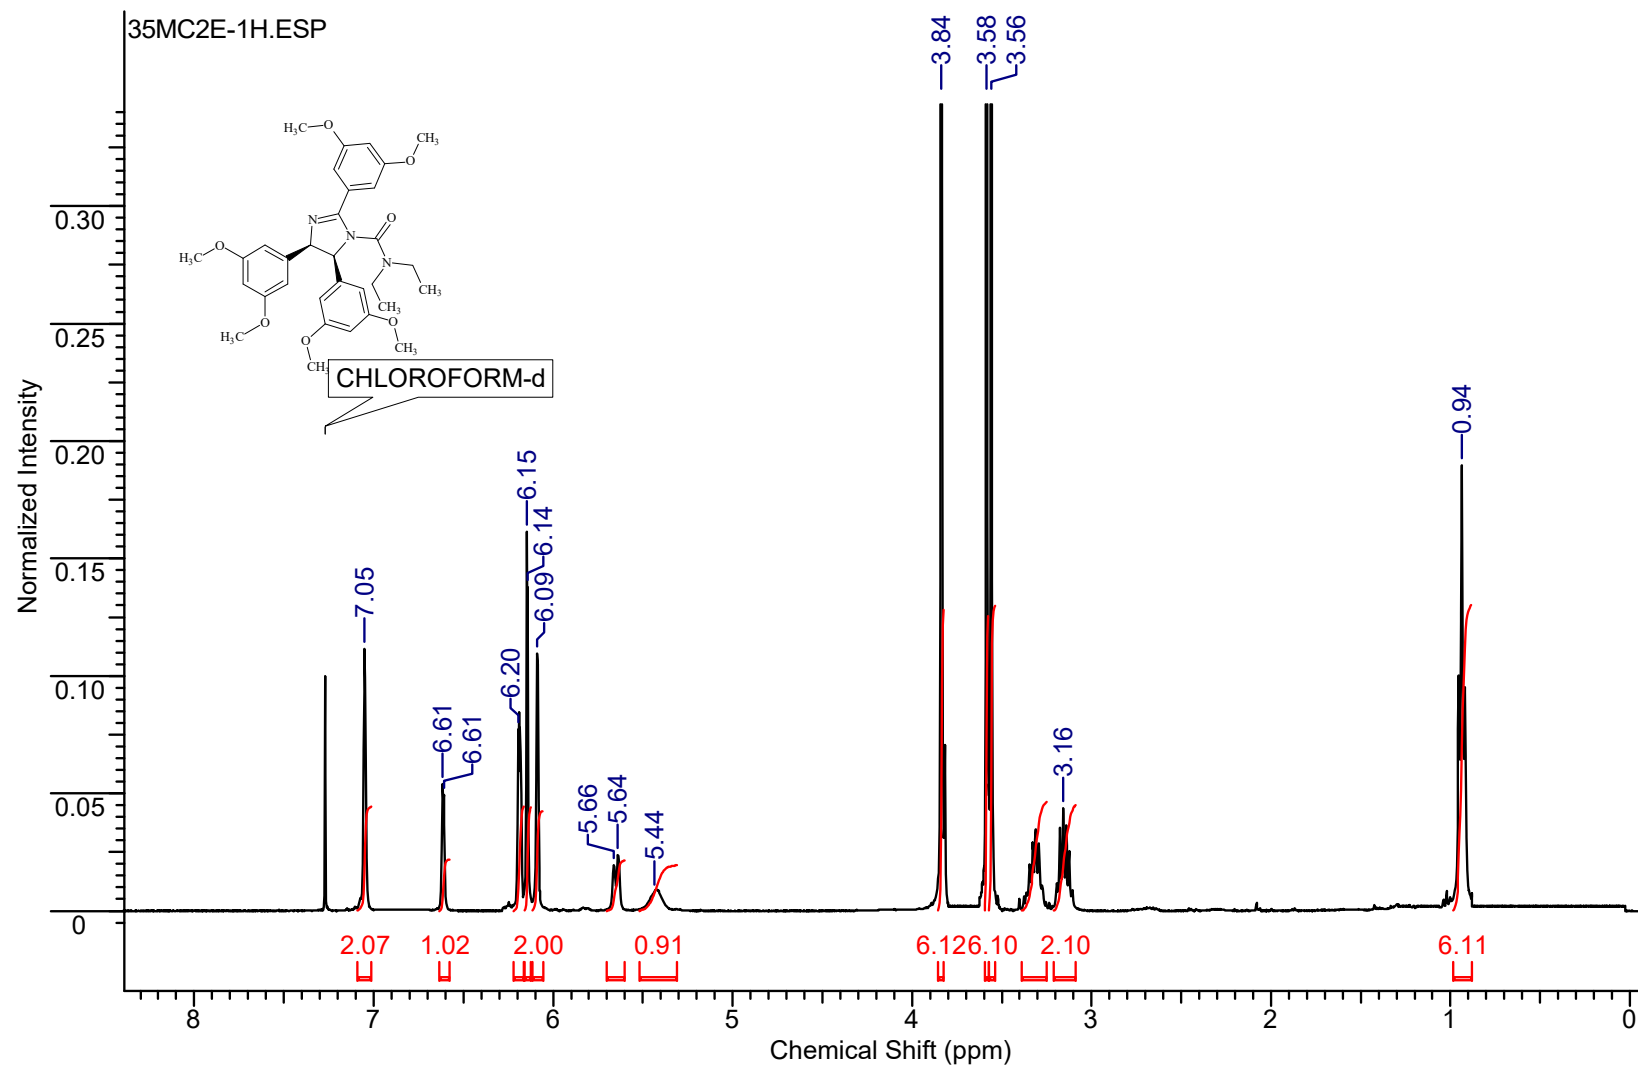

***<sup>13</sup>C NMR* *Cis-N,N*-diethyl-2,4,5-*tris*(3,5-dimethoxyphenyl)-4,5-dihydro-1*H*-imidazole-1-carboxamide (2u).**

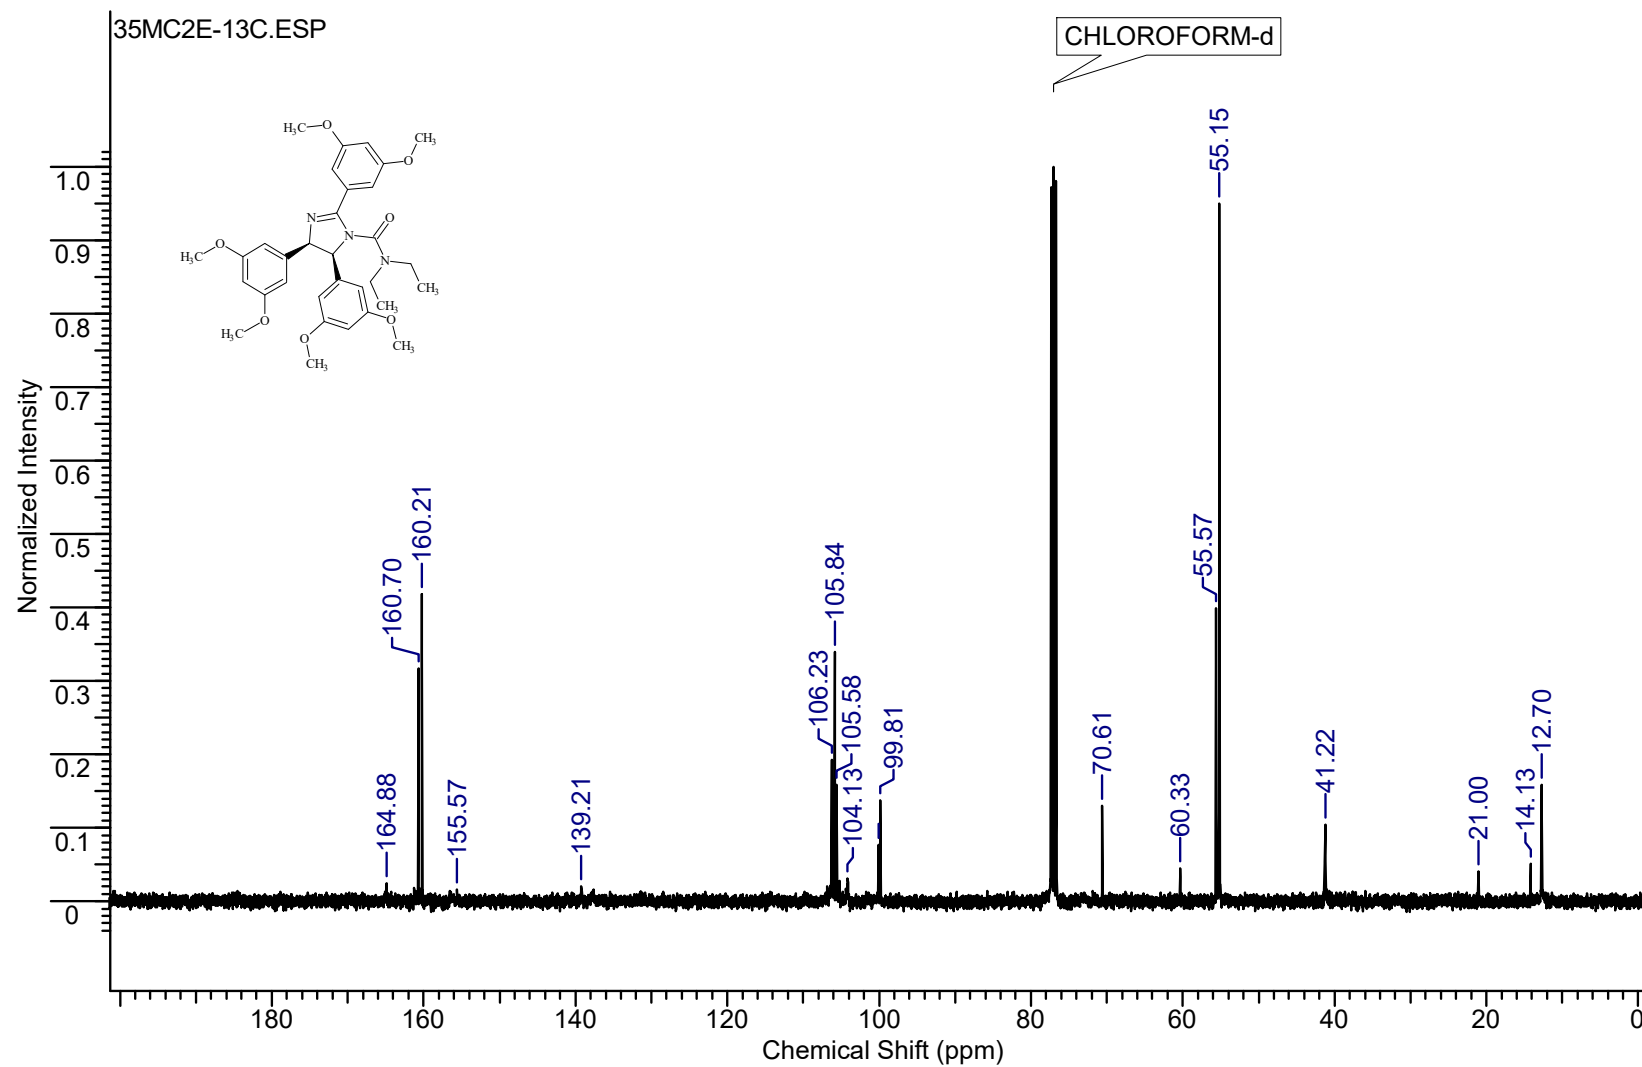

**<sup>1</sup>H NMR 4-[[*Cis*-2,4,5-*tris*(3,5-dimethoxyphenyl)-4,5-dihydro-1*H*-imidazol-1-yl]carbonyl]morpholine (2v).**

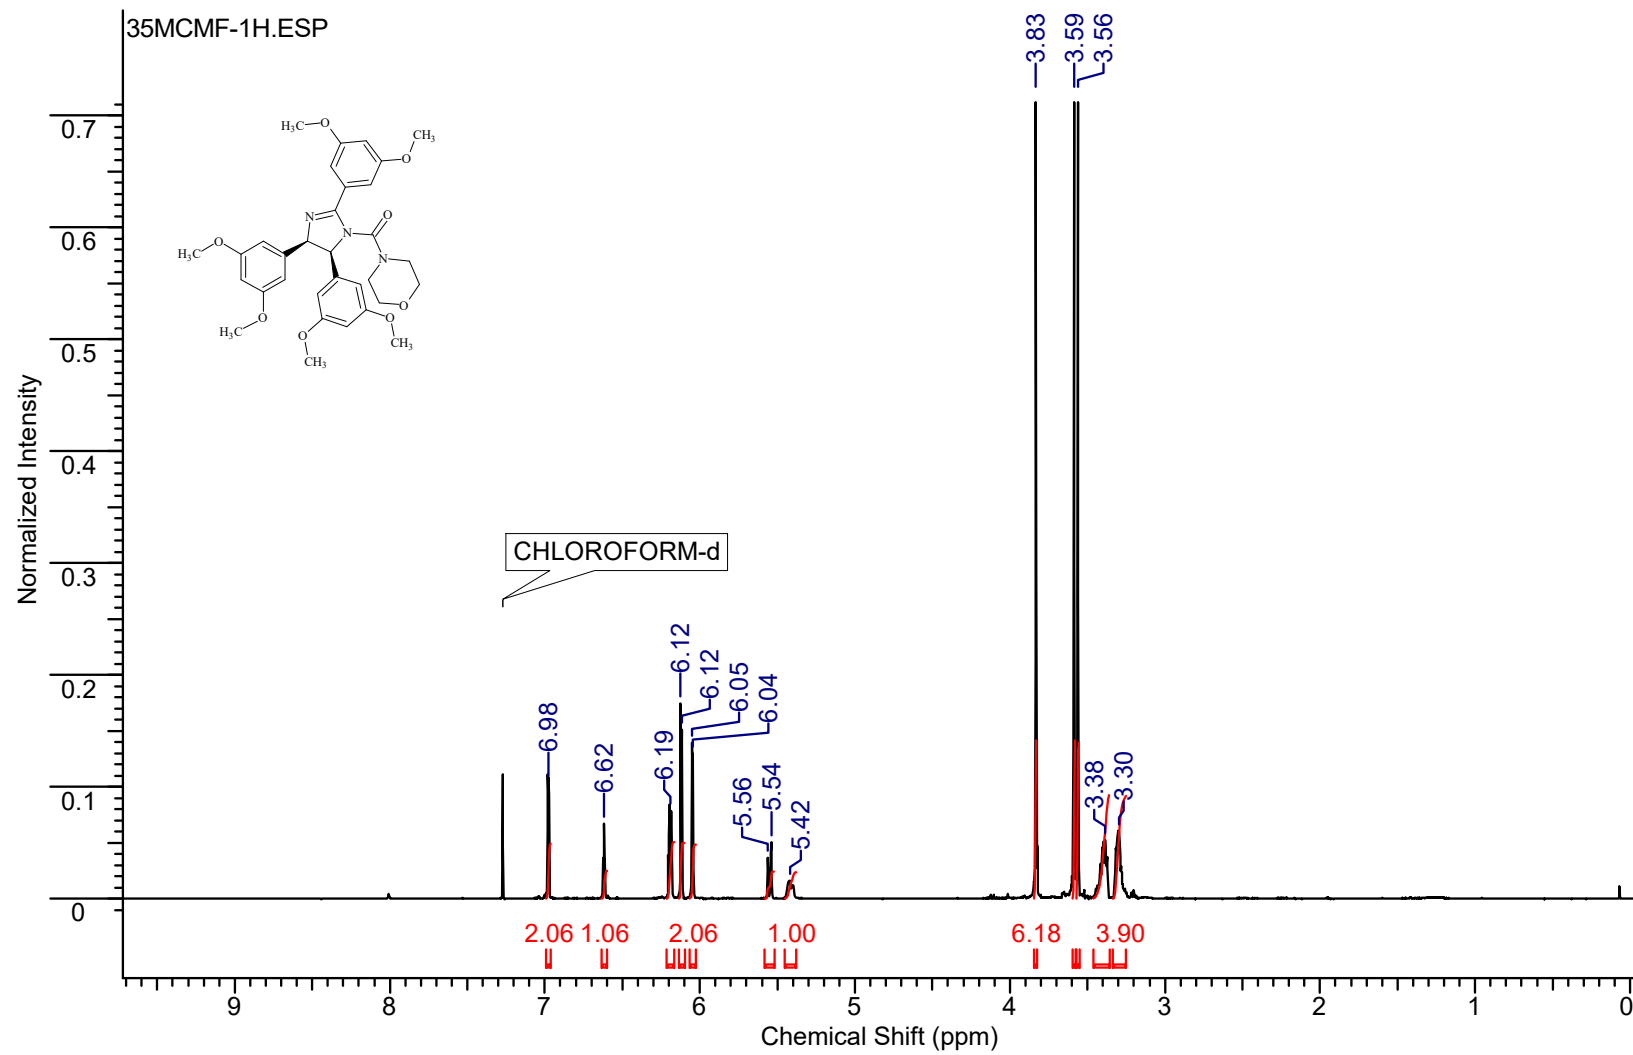

**<sup>13</sup>C NMR 4-*[(Cis-2,4,5-tris(3,5-dimethoxyphenyl)-4,5-dihydro-1H-imidazol-1-yl)carbonyl]morpholine (2v).***

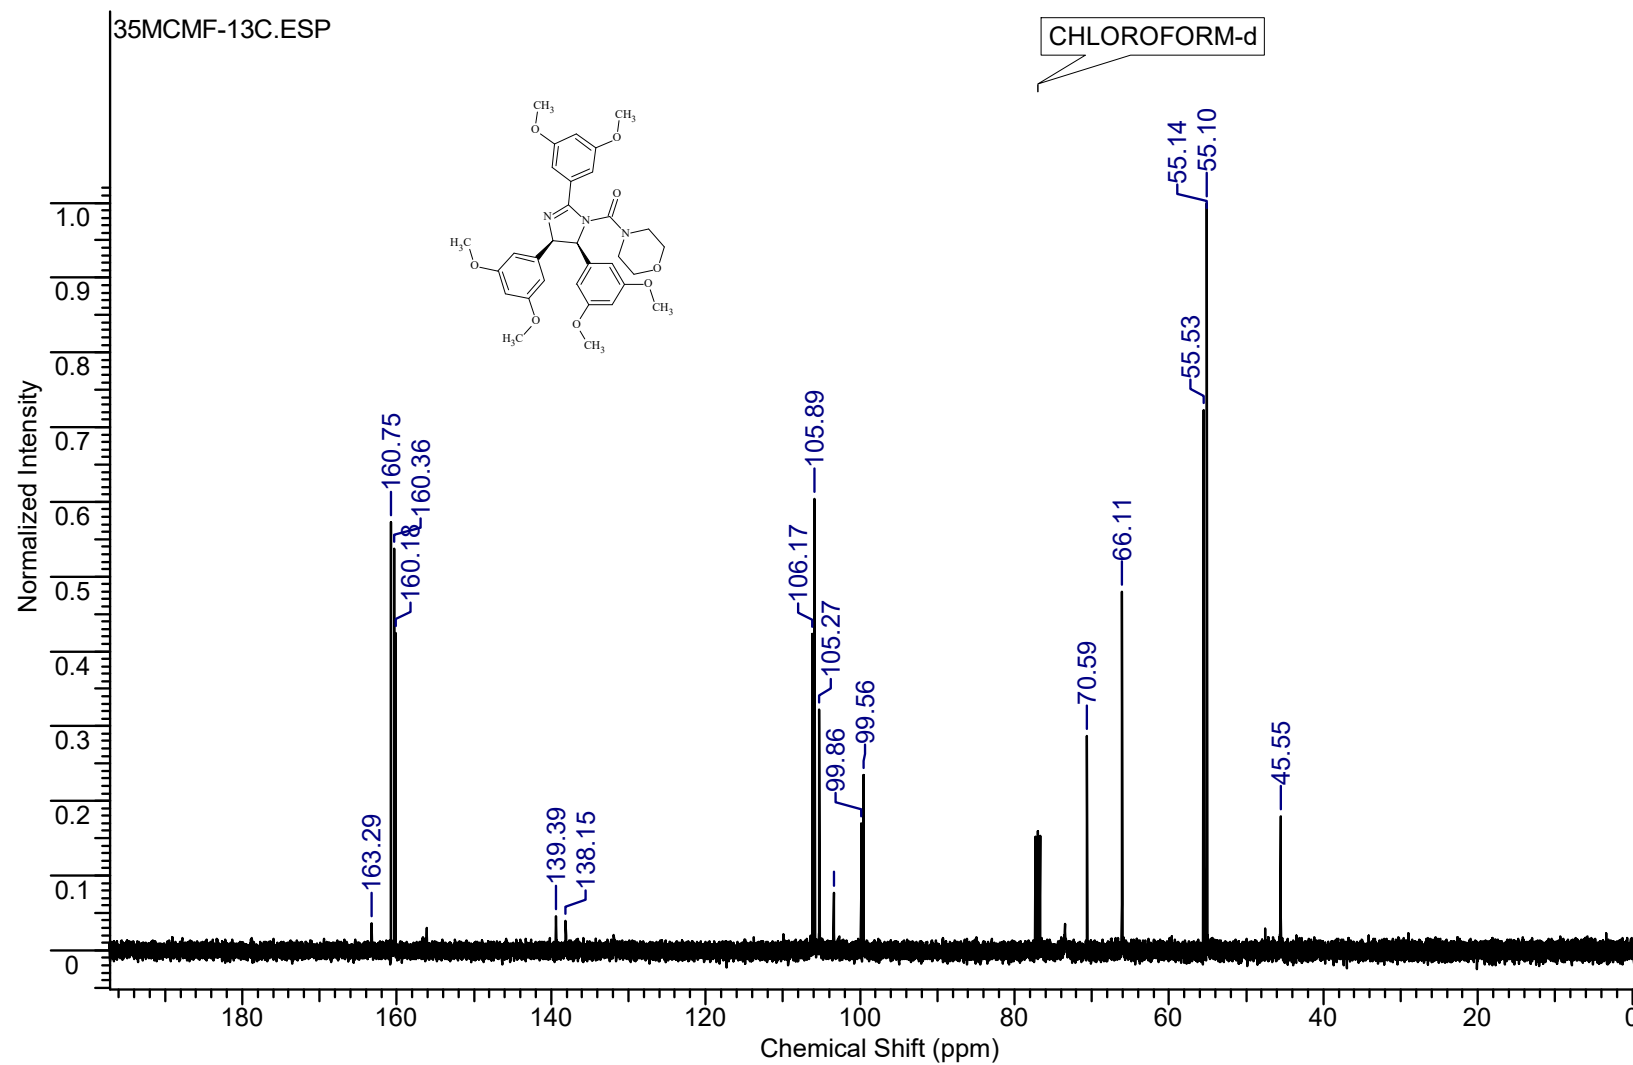

**<sup>1</sup>H NMR (4-Methylpiperazin-1-yl)(*cis*-2,4,5-*tris*(3,5-dimethoxyphenyl)-4,5-dihydro-1*H*-imidazol-1-yl)methanone (2w).**

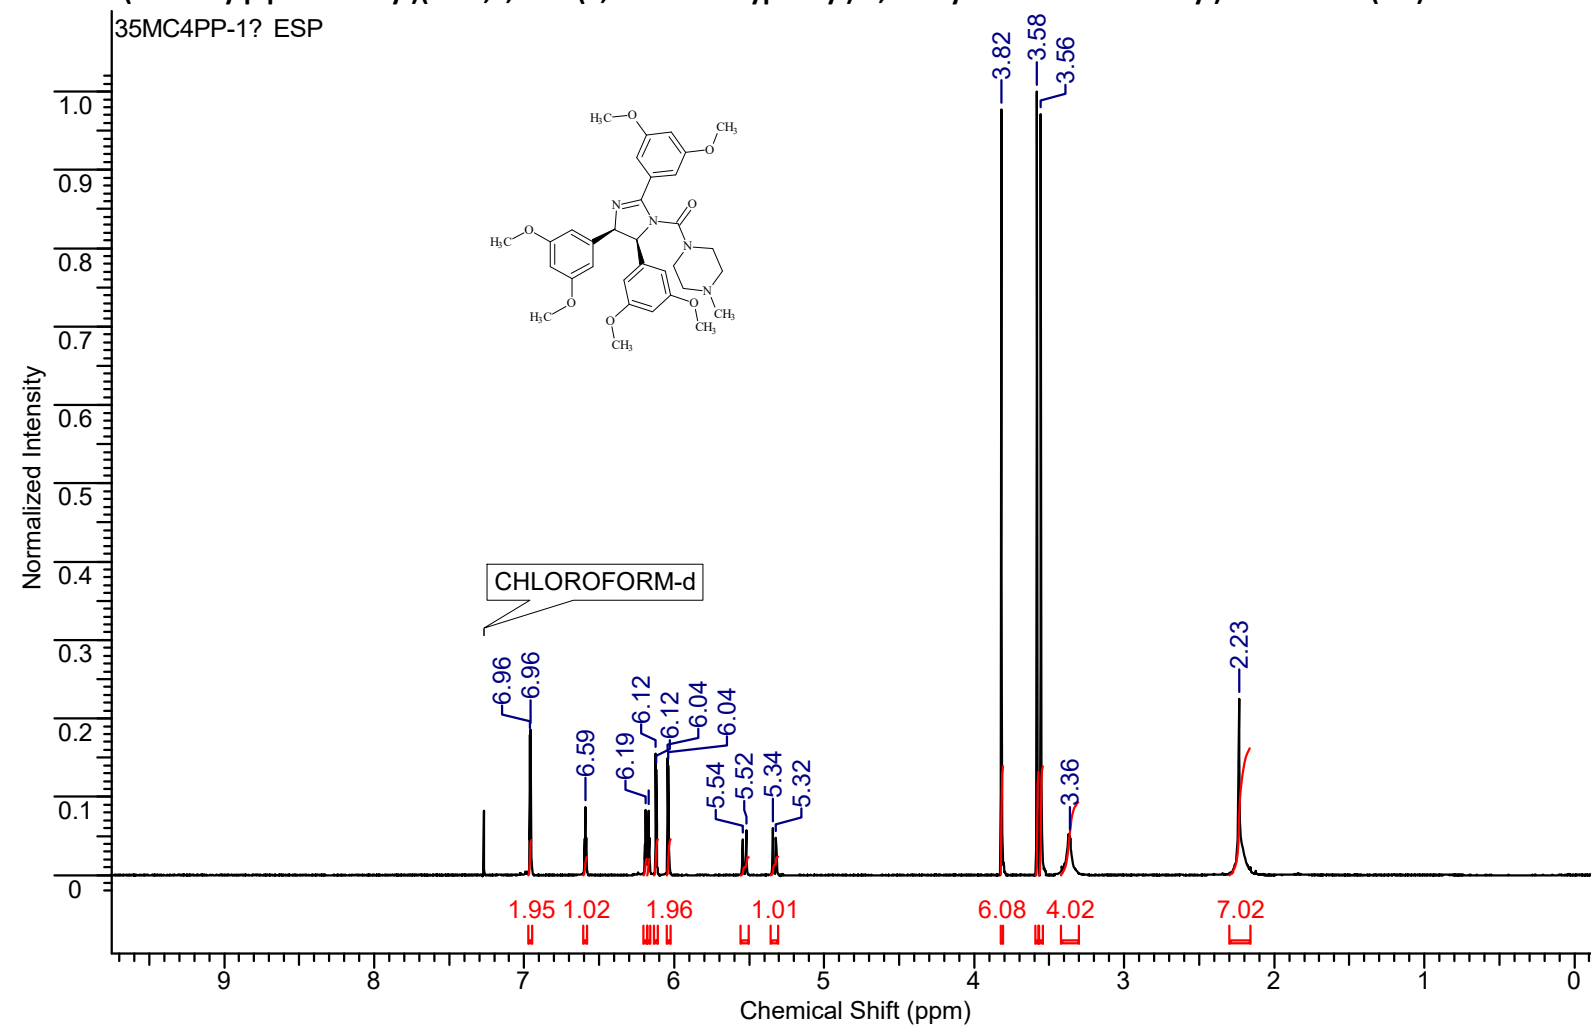

**<sup>13</sup>C NMR (4-Methylpiperazin-1-yl)(*cis*-2,4,5-*tris*(3,5-dimethoxyphenyl)-4,5-dihydro-1*H*-imidazol-1-yl)methanone (2w).**

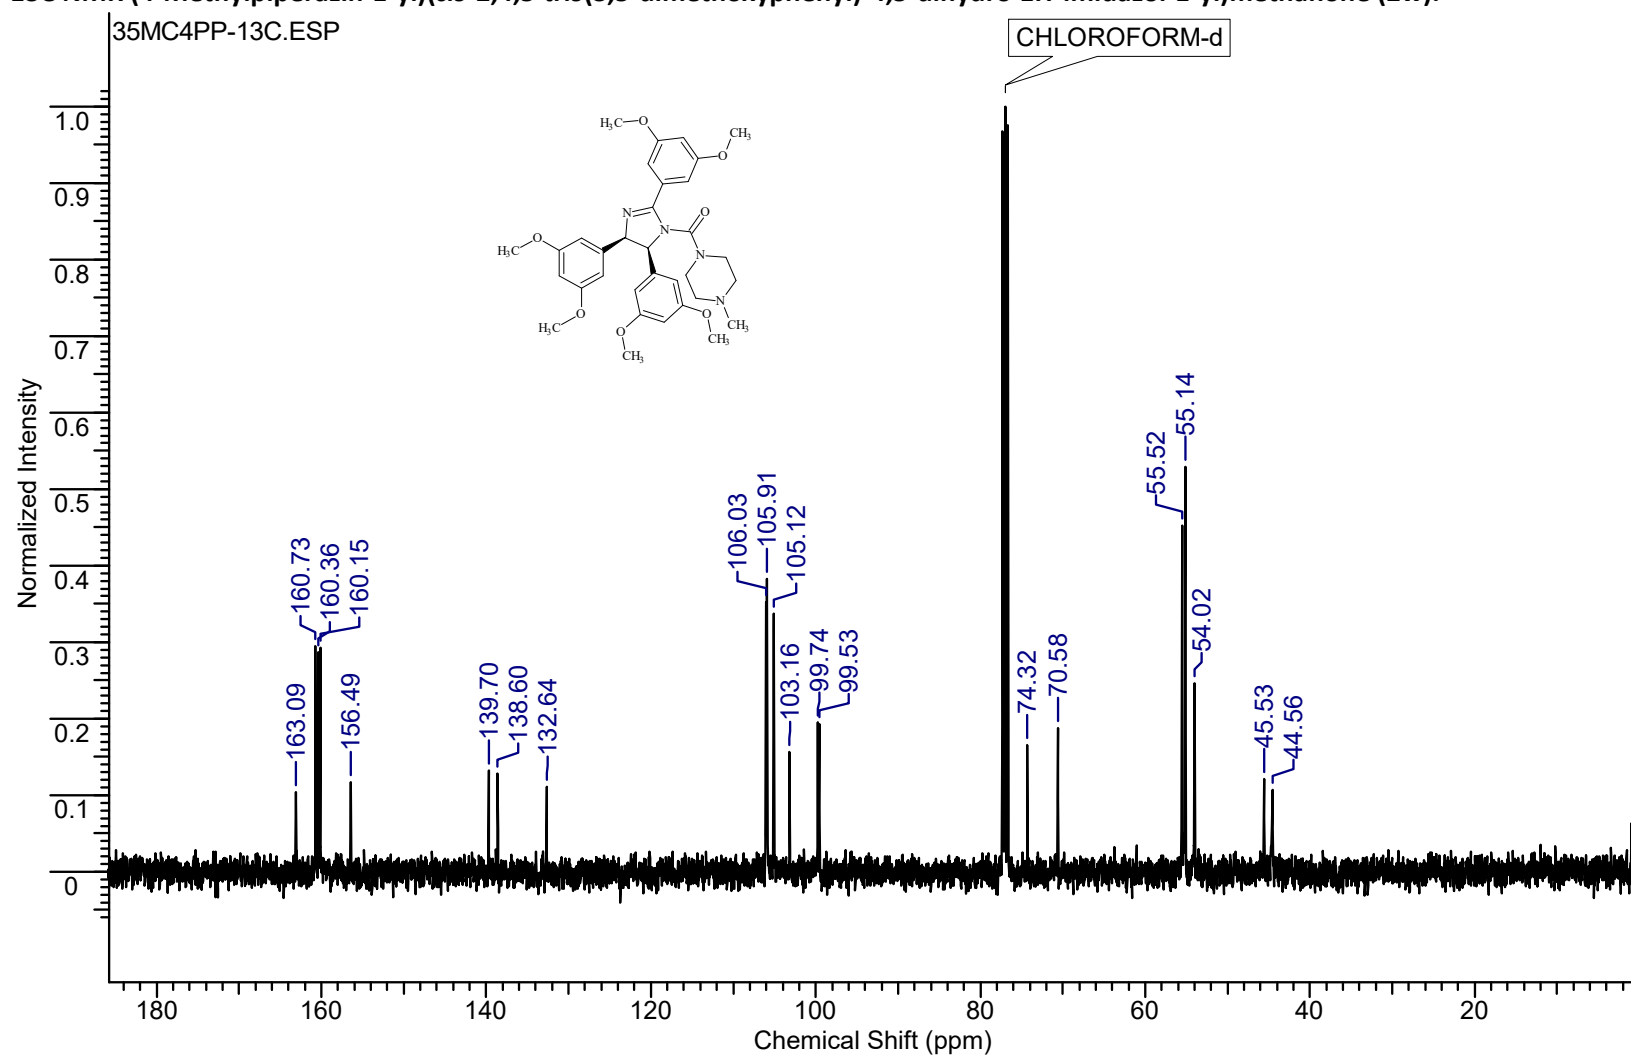

**<sup>1</sup>H NMR Piperidin-1-yl(*cis*-2,4,5-*tris*(4-chlorophenyl)-4,5-dihydro-1*H*-imidazol-1-yl)methanone (2x).**

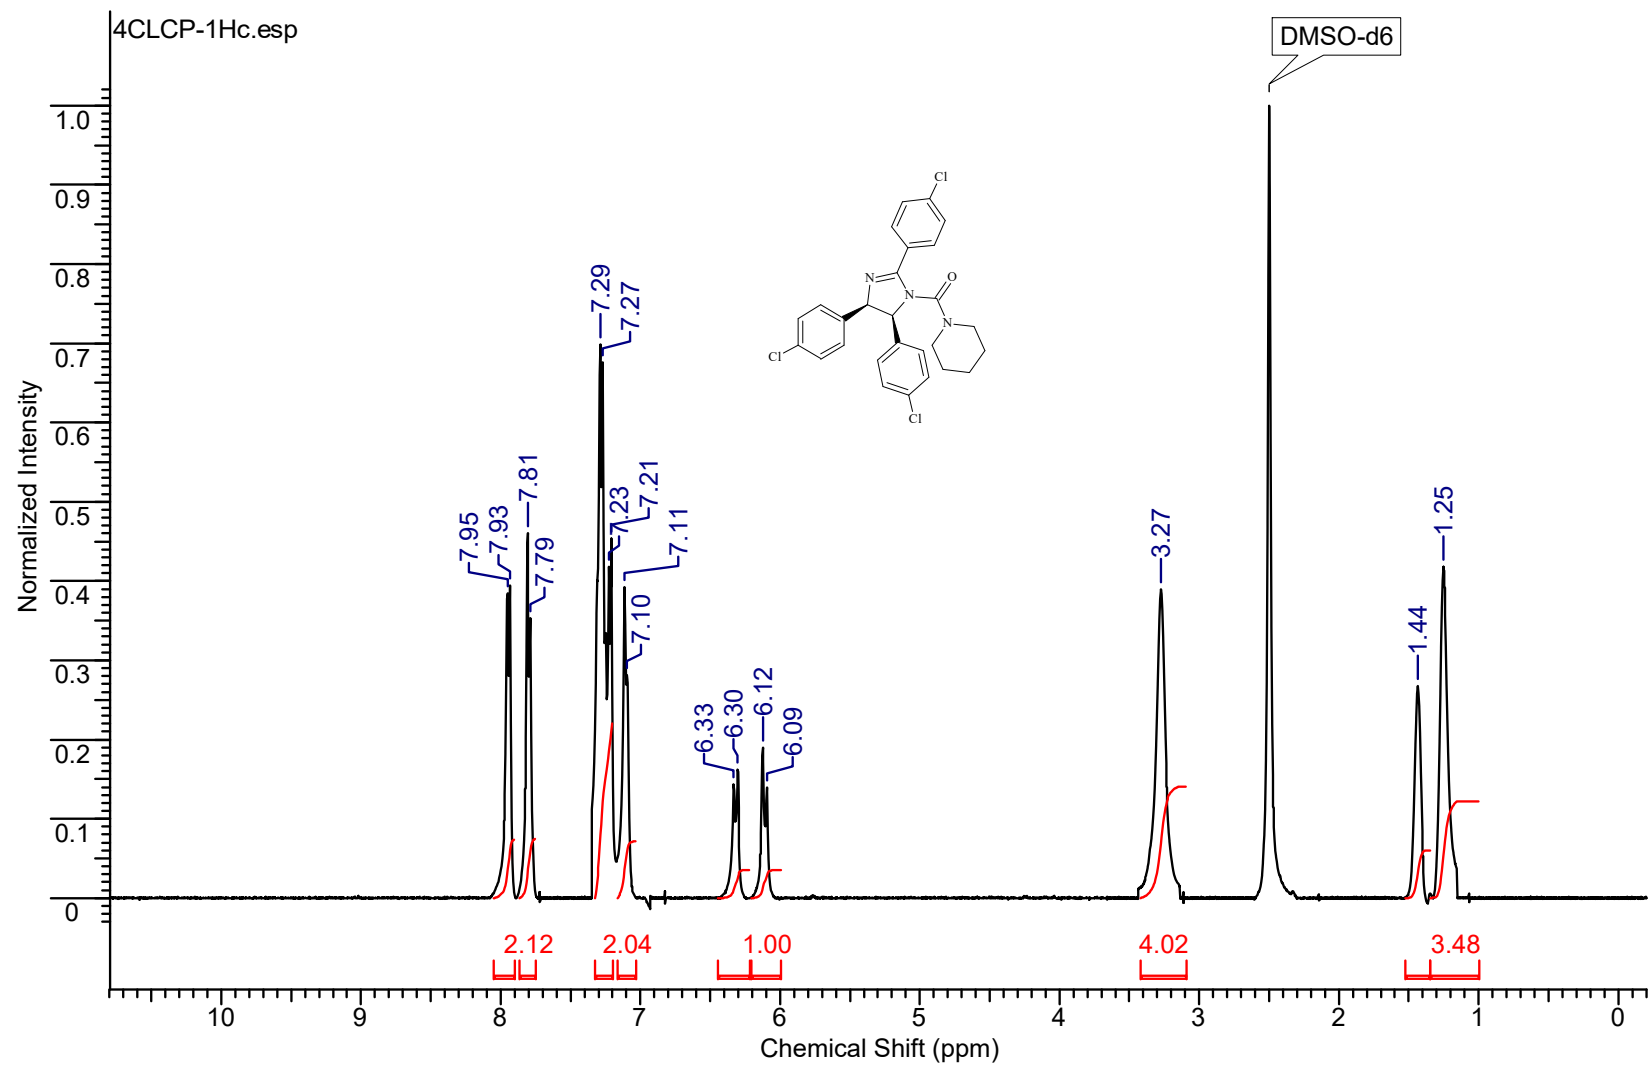

**<sup>13</sup>C NMR Piperidin-1-yl(*cis*-2,4,5-*tris*(4-chlorophenyl)-4,5-dihydro-1*H*-imidazol-1-yl)methanone (2x).**

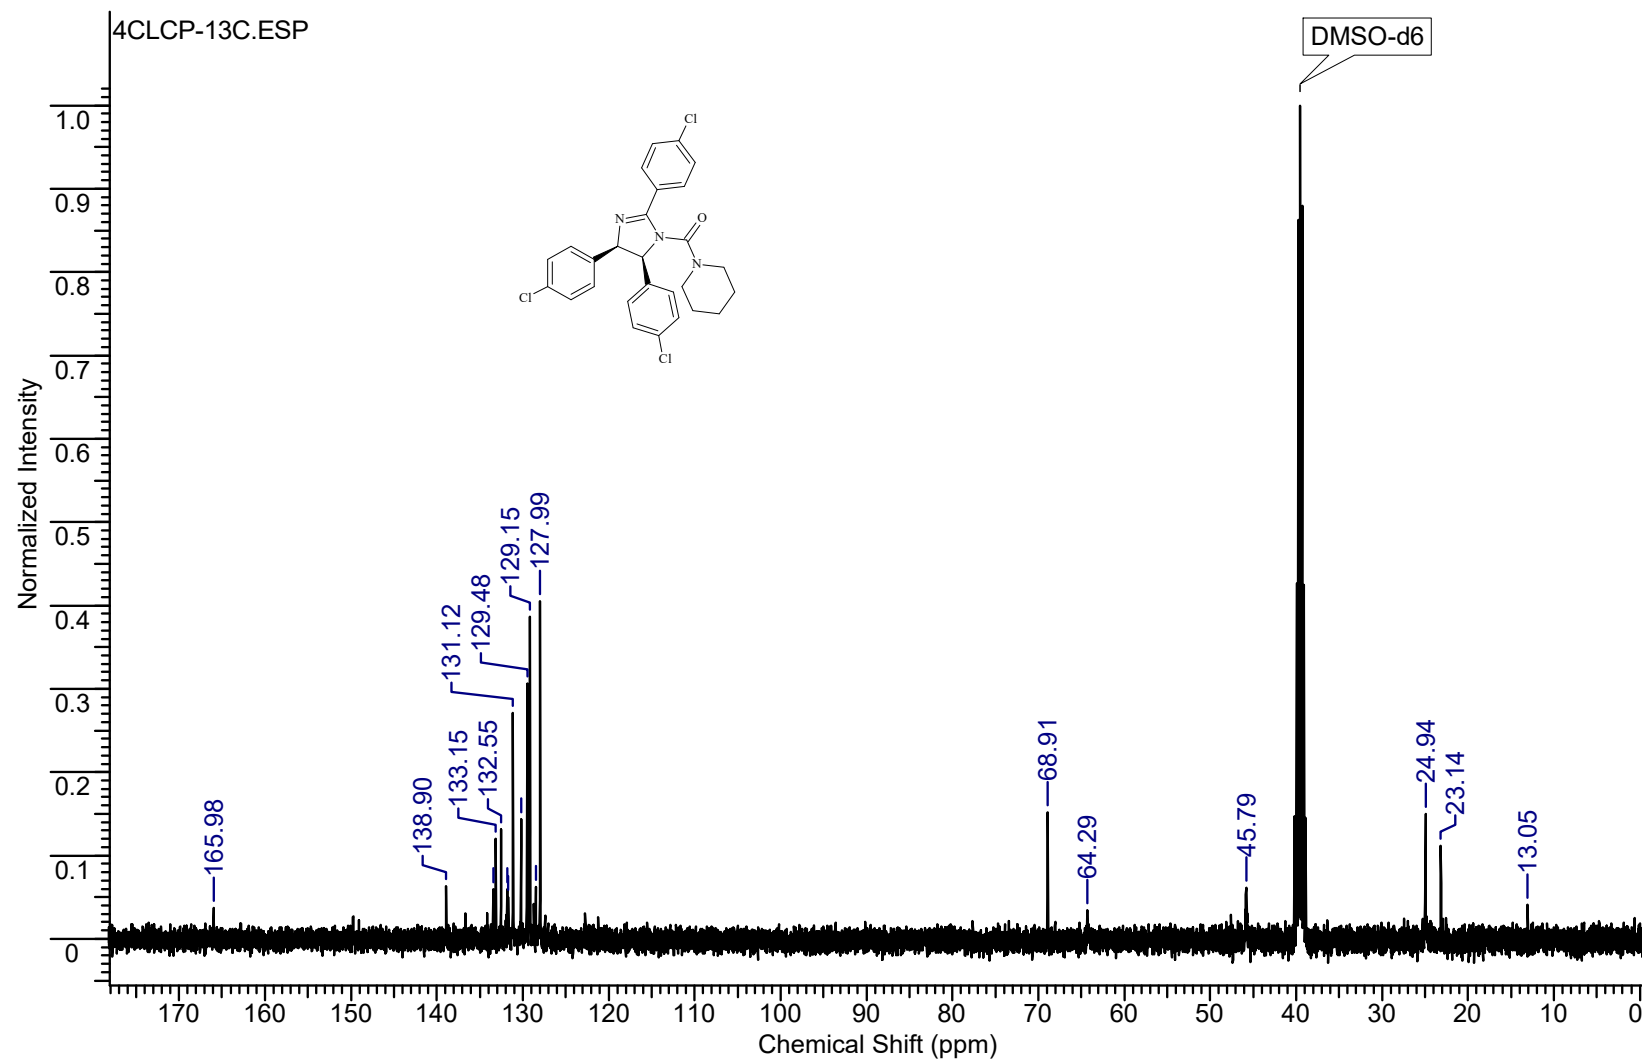

**<sup>1</sup>H NMR *Cis-N,N*-diethyl-2,4,5-*tris*(2,4-dichlorophenyl)-4,5-dihydro-1*H*-imidazole-1-carboxamide (2y).**

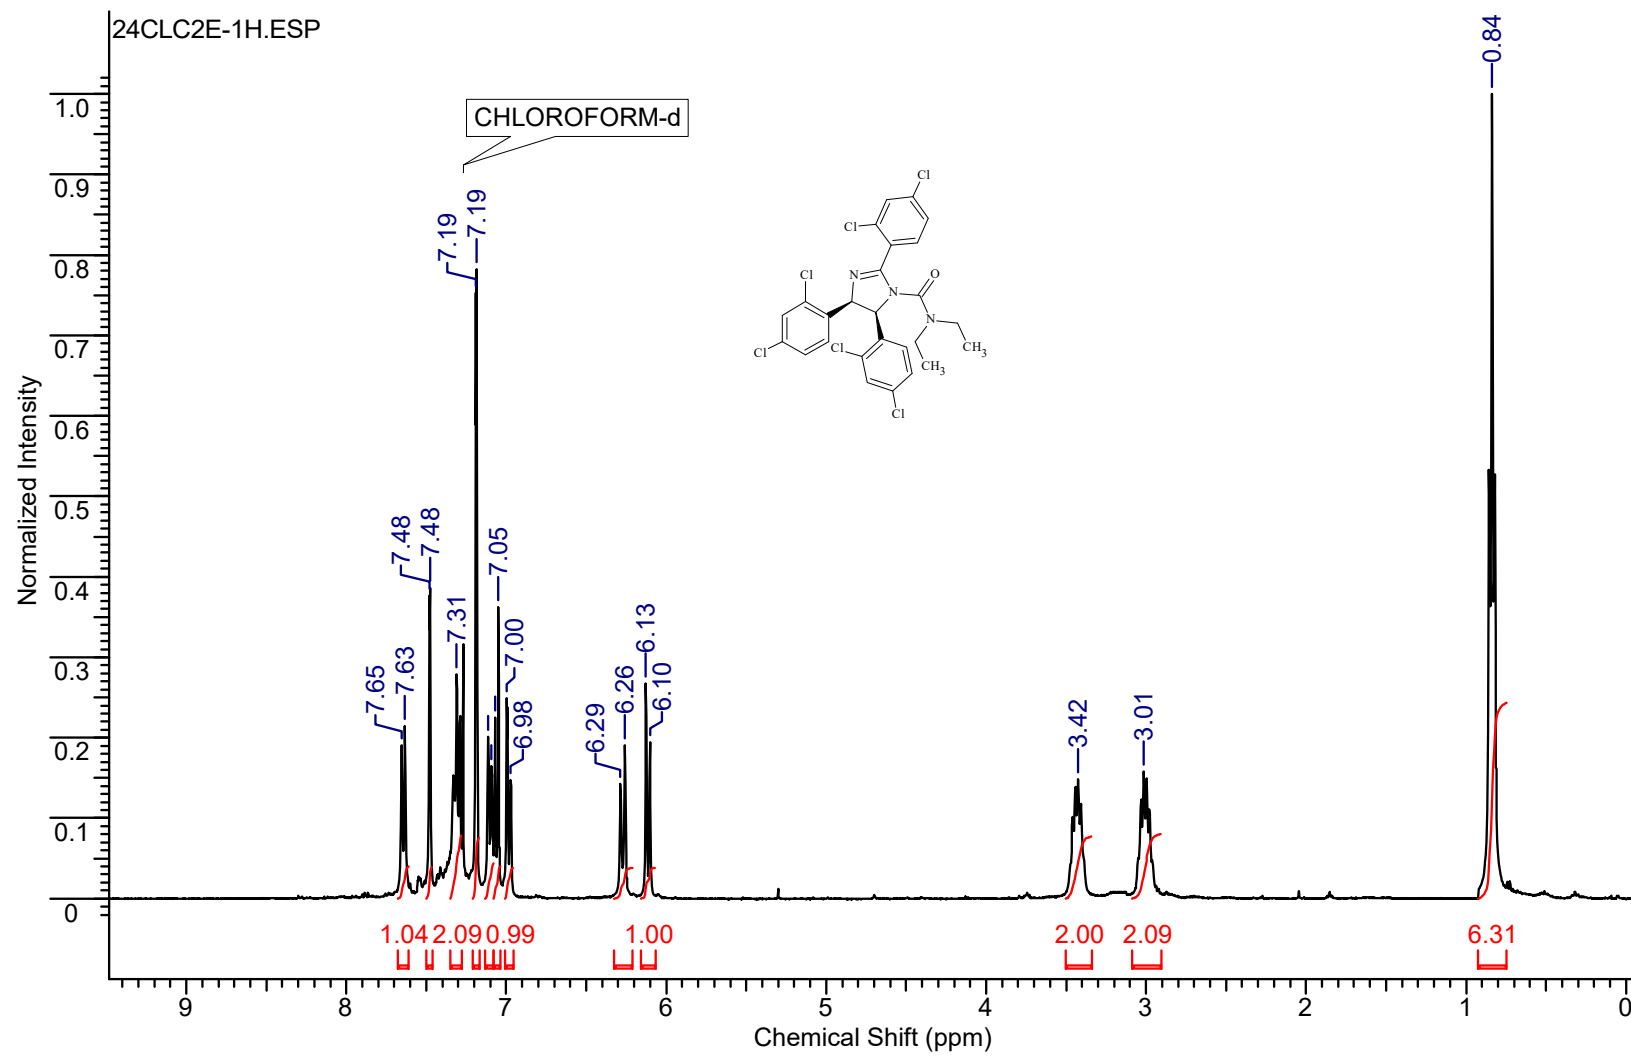

**<sup>13</sup>C NMR *Cis-N,N*-diethyl-2,4,5-*tris*(2,4-dichlorophenyl)-4,5-dihydro-1*H*-imidazole-1-carboxamide (2y).**

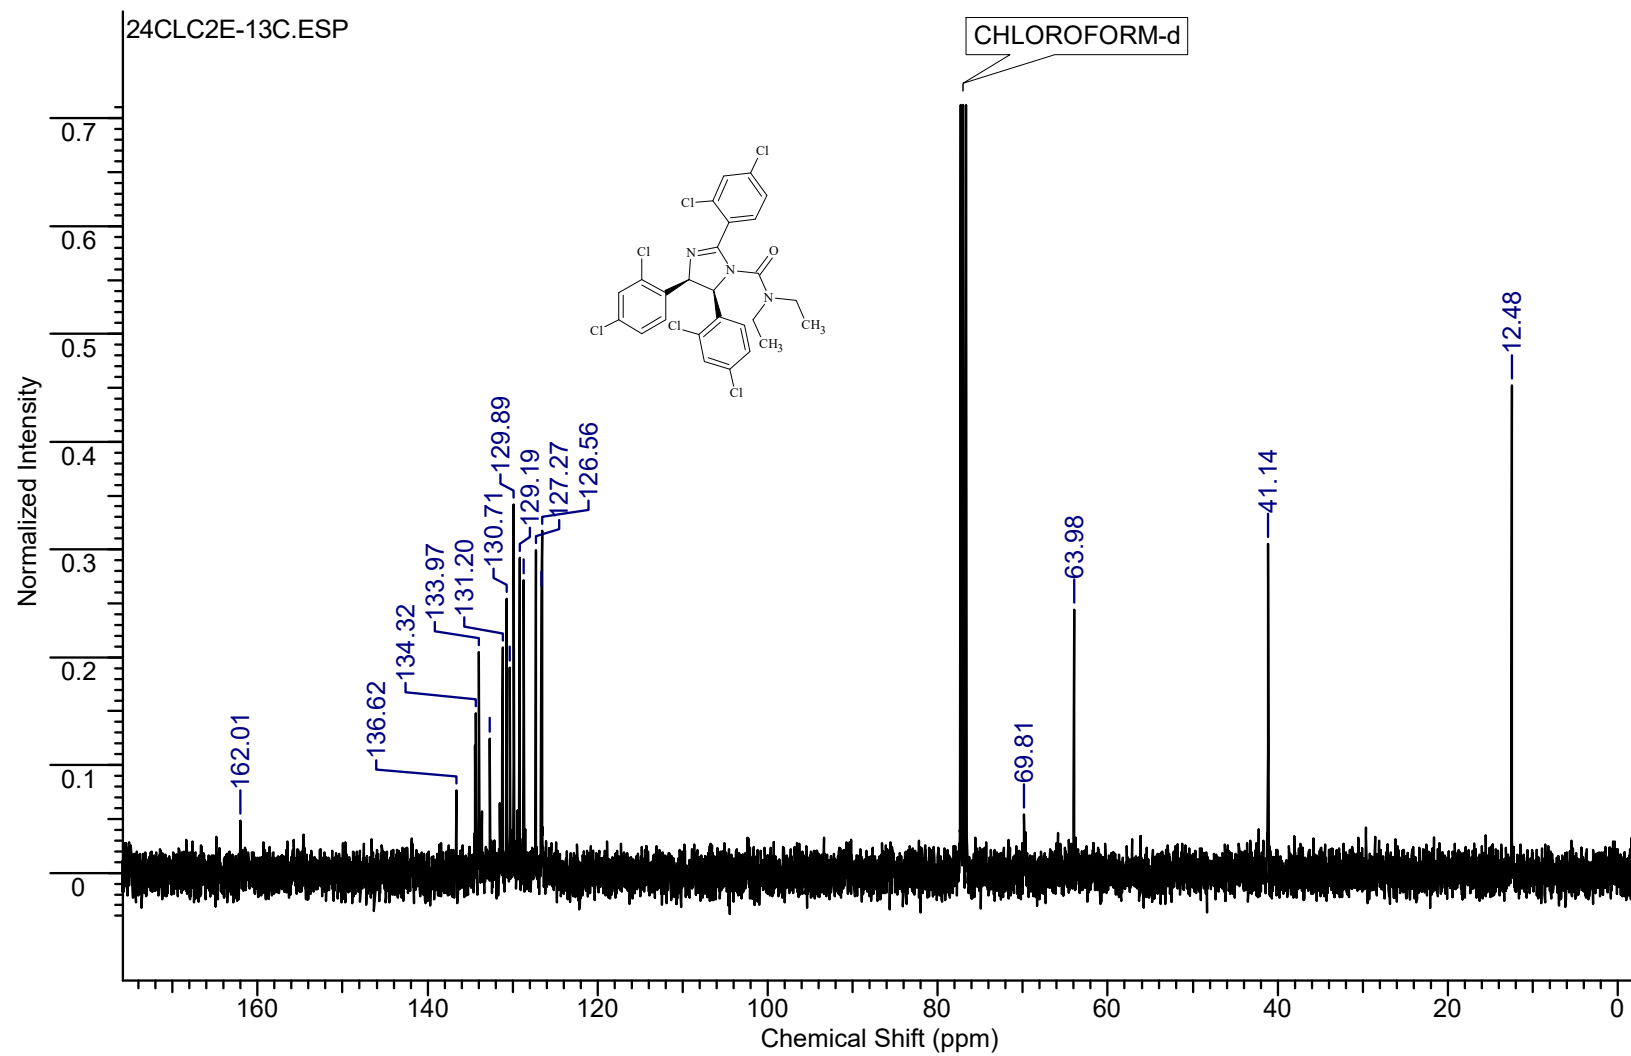

**<sup>1</sup>H NMR 4-[[*Cis*-2,4,5-*tris*(2,4-dichlorophenyl)-4,5-dihydro-1*H*-imidazol-1-yl]carbonyl]morpholine (2z).**

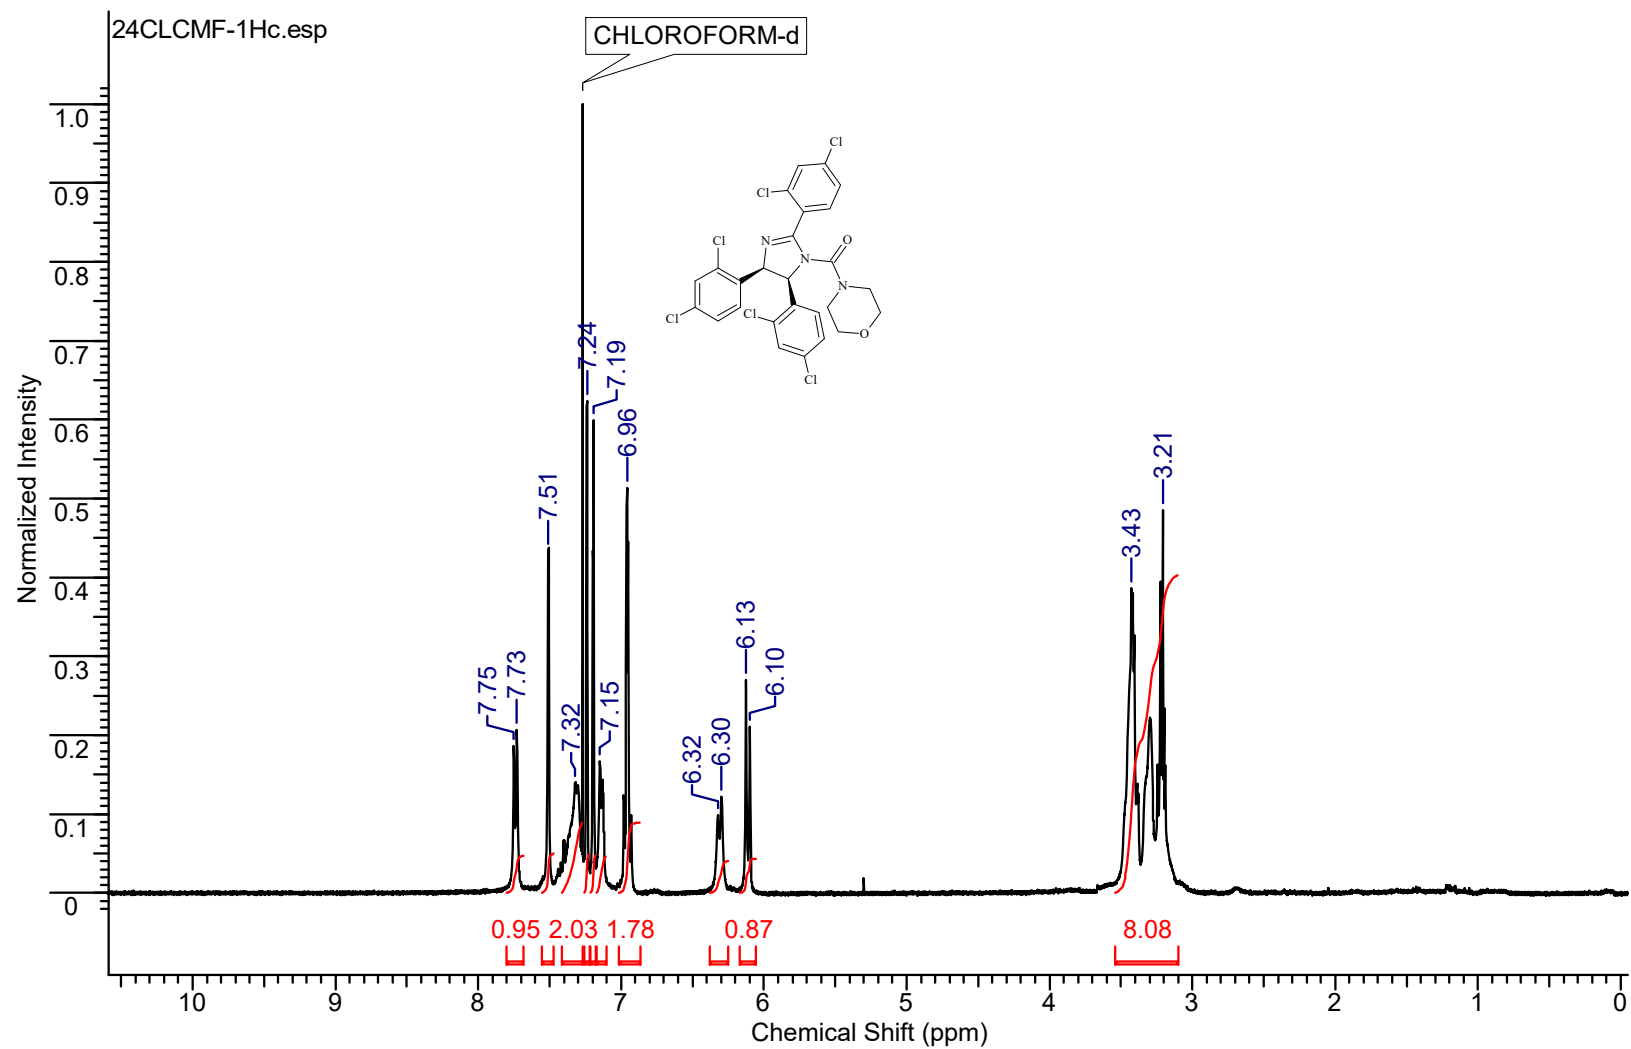

**<sup>13</sup>C NMR 4-[[*Cis*-2,4,5-*tris*(2,4-dichlorophenyl)-4,5-dihydro-1*H*-imidazol-1-yl]carbonyl]morpholine (2z).**

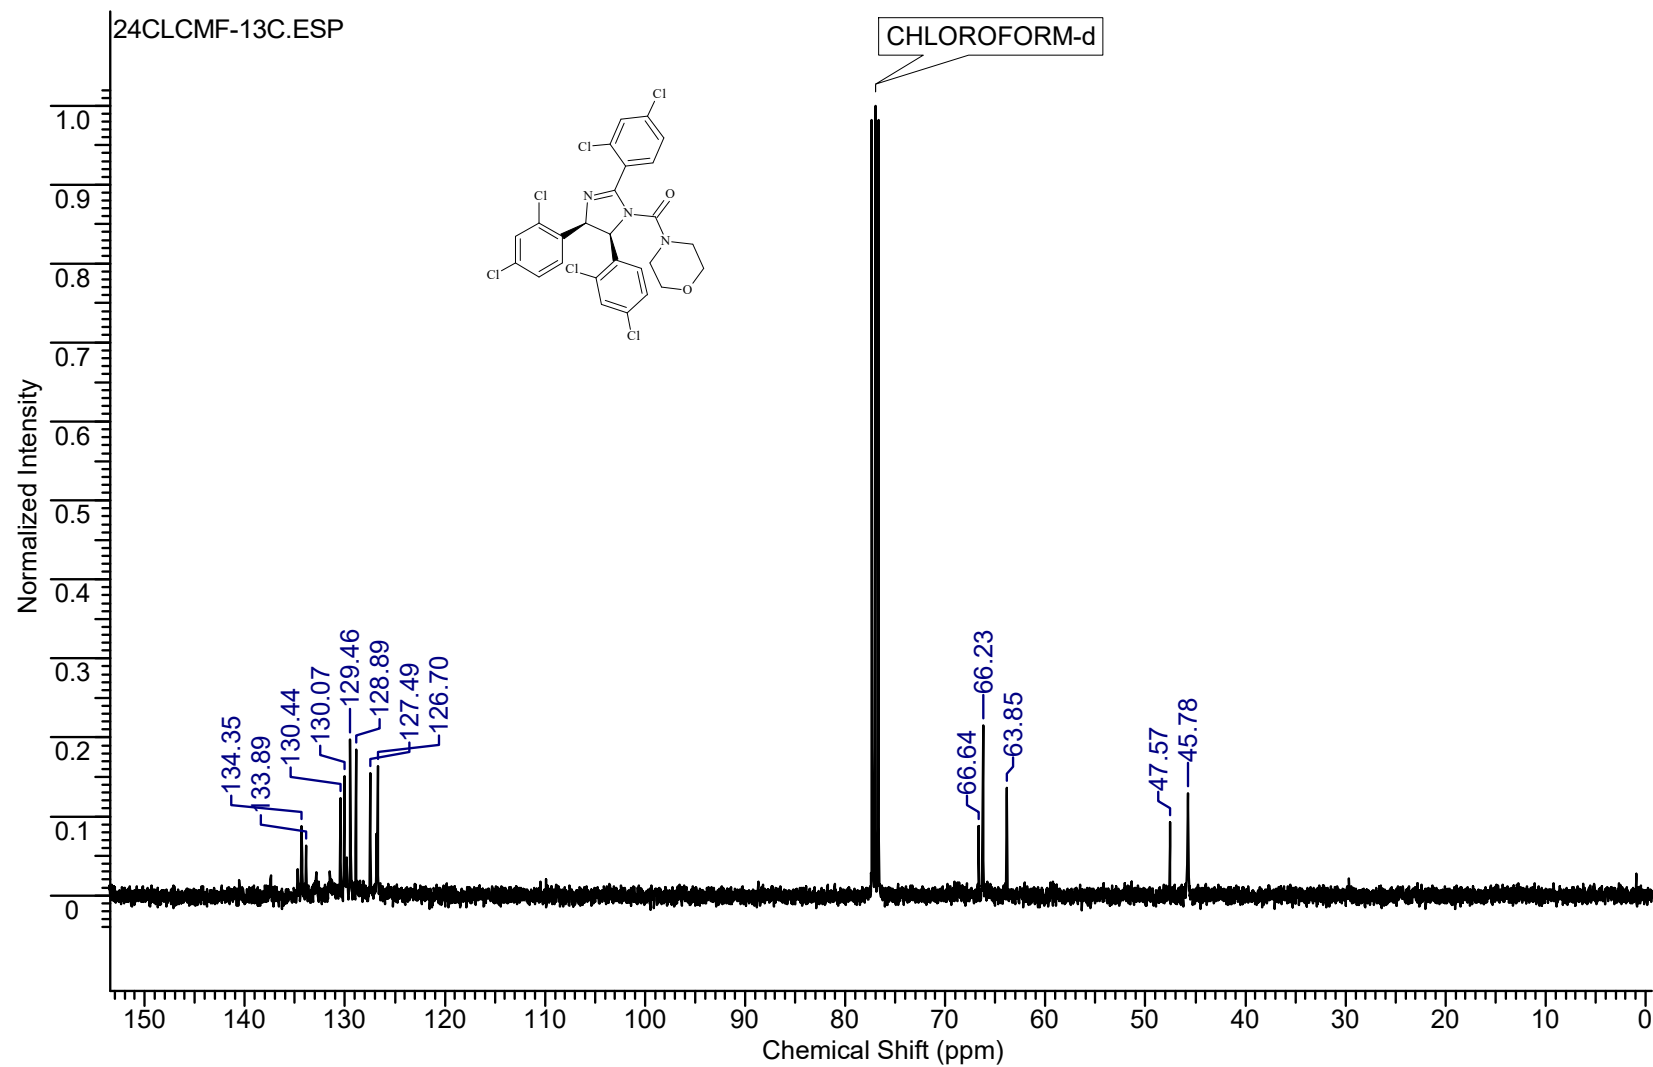

**<sup>1</sup>H NMR *tert*-Butyl 4-(*cis*-2,4,5-*tris*(2,4-dichlorophenyl)-4,5-dihydro-1*H*-imidazole-1-carbonyl)piperazine-1-carboxylate (2aa).**

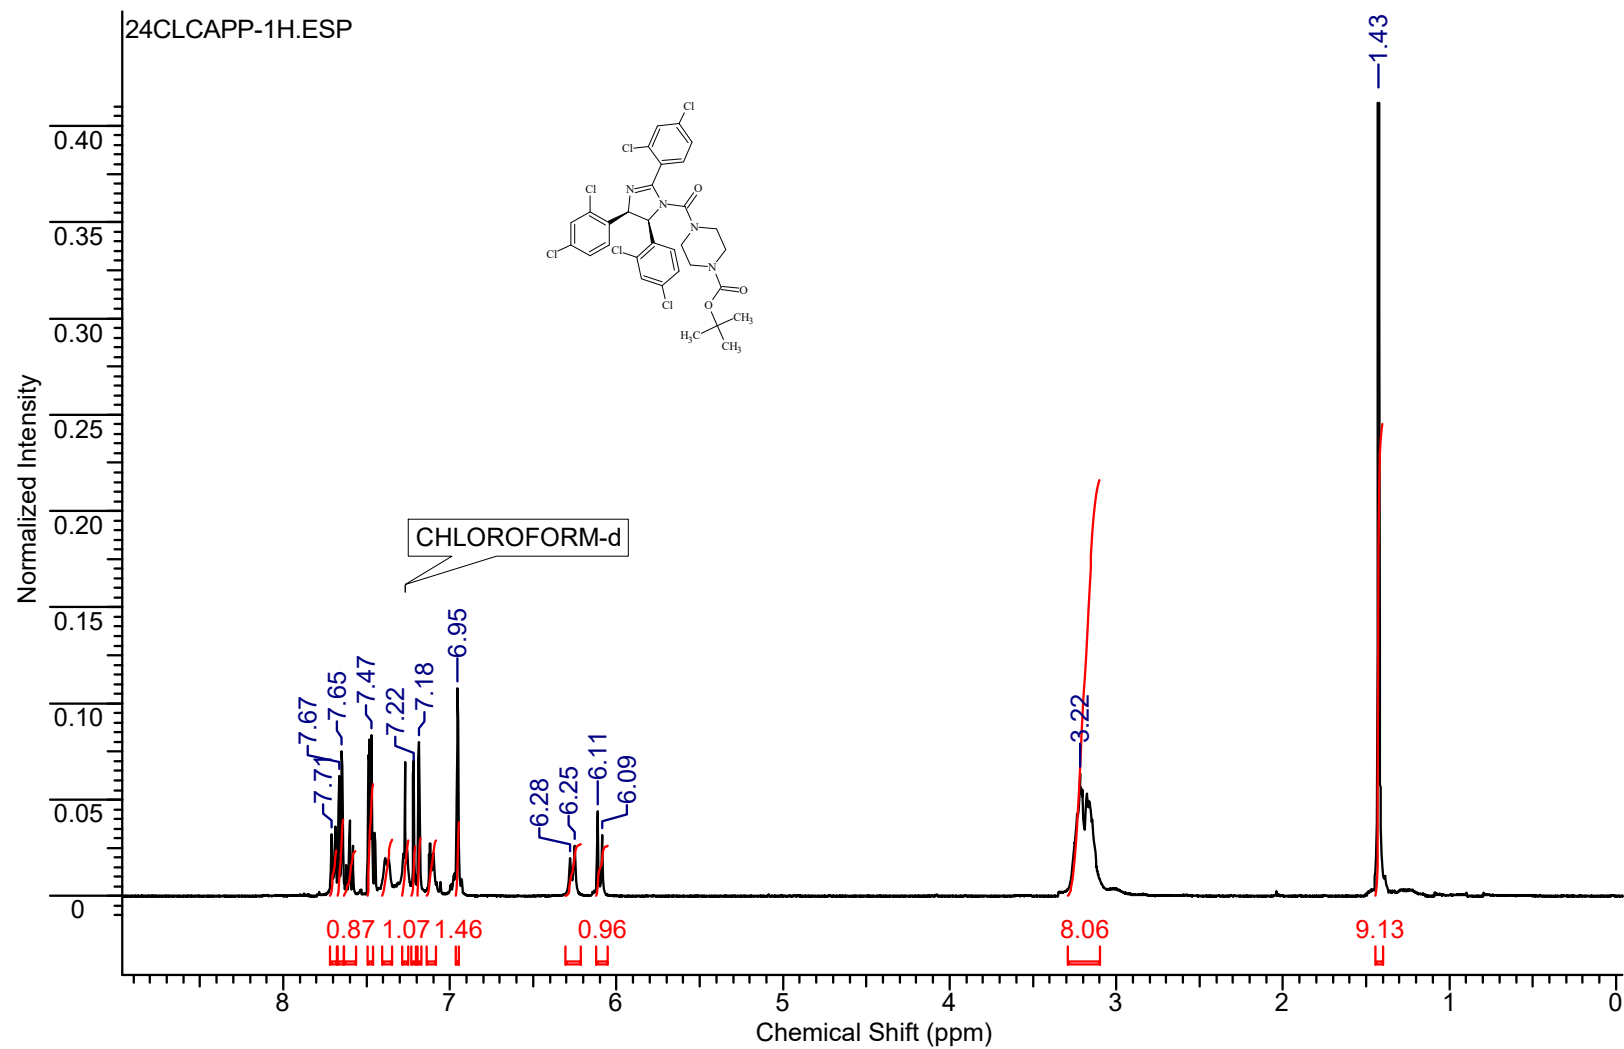

**<sup>13</sup>C NMR *tert*-Butyl 4-(*cis*-2,4,5-*tris*(2,4-dichlorophenyl)-4,5-dihydro-1*H*-imidazole-1-carbonyl)piperazine-1-carboxylate (2aa).**

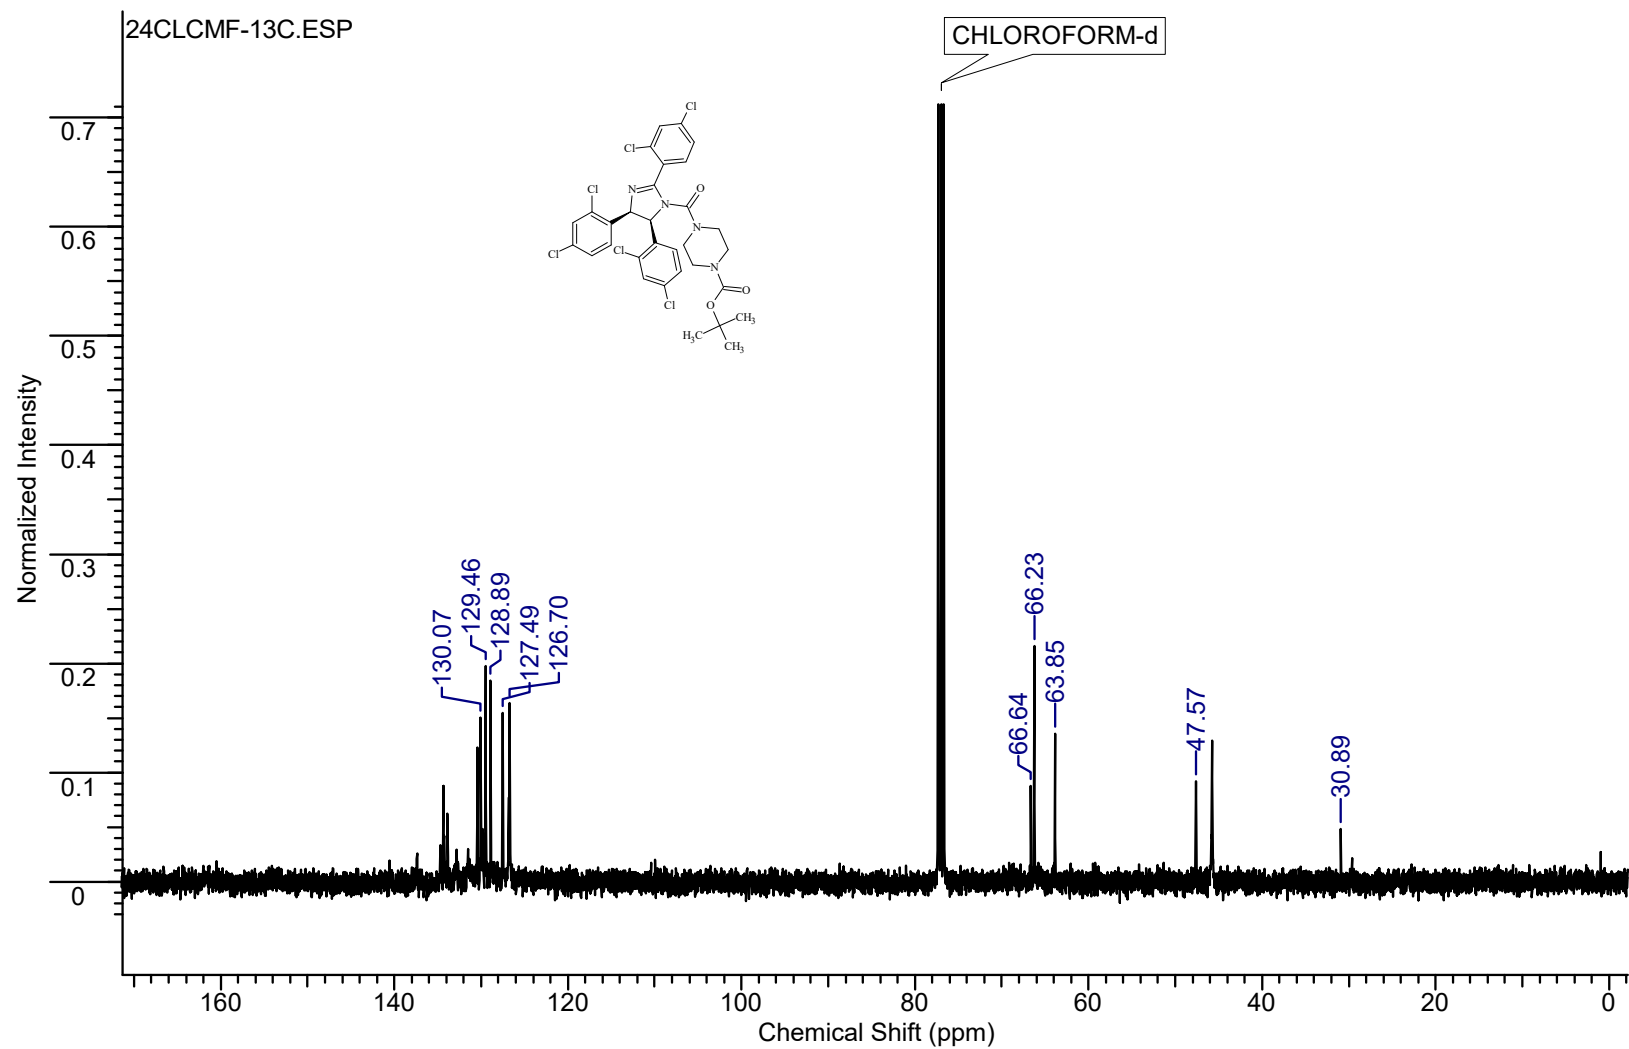

Supplement: s1 [file s1]
